# Supplementary material for: Biased, Non-equivalent Gene-Proximal and -Distal Binding Motifs of Orphan Nuclear Receptor TR4 in Primary Human Erythroid Cells
Source: PubMed Central journal article supplement (PMC4014424; doi:10.1371/journal.pgen.1004339), 2014-05-08

### Supplemental Figure 5

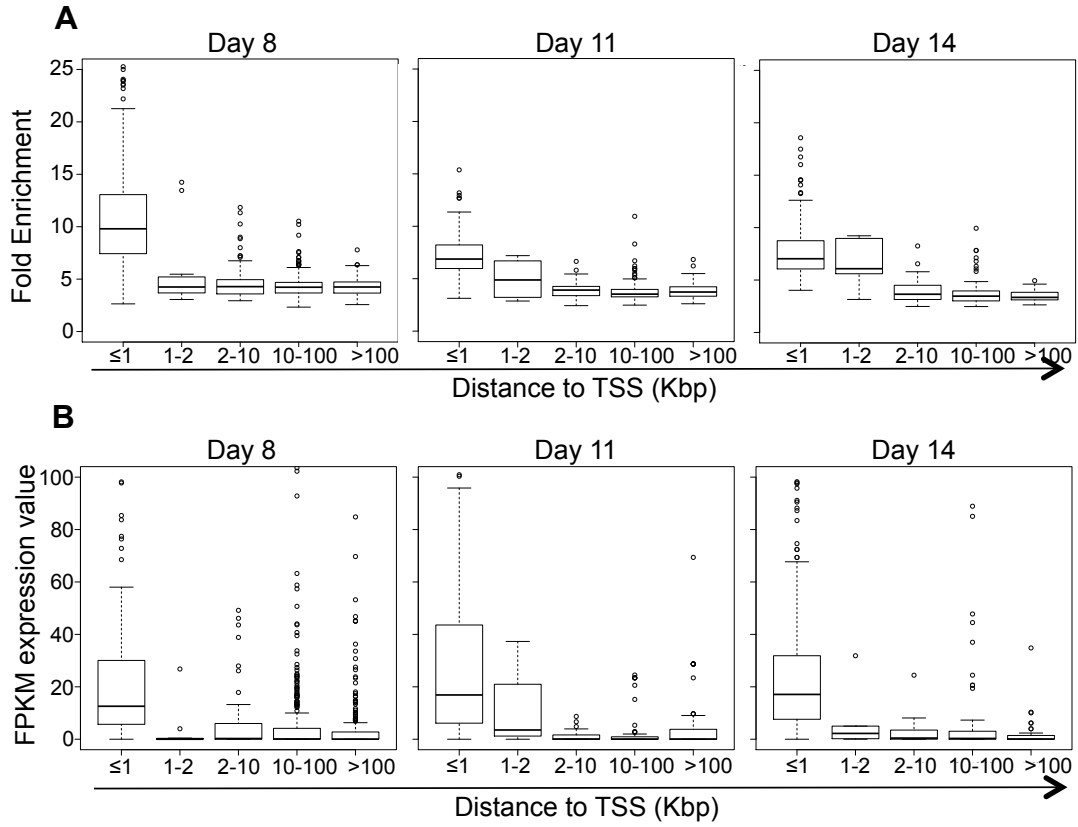

Supplement: pgen.1004339.s005.pdf [file pgen.1004339.s005.pdf]
