# Supplementary material for: Biased, Non-equivalent Gene-Proximal and -Distal Binding Motifs of Orphan Nuclear Receptor TR4 in Primary Human Erythroid Cells
Source: PubMed Central journal article supplement (PMC4014424; doi:10.1371/journal.pgen.1004339), 2014-05-08
Supplement: pgen.1004339.s007.pdf [file pgen.1004339.s007.pdf]

## DIFFERENTIALLY EXPRESSED GENES FOLLOWING shRNA-MEDIATED TR4 KNOCKDOWN

| Gene_Name | FPKM_Control | FPKM_Sh#174 | FPKM_Sh#658 | FoldChange.Sh#174 | FoldChange.Sh#658 |
|-----------|--------------|-------------|-------------|-------------------|-------------------|
| A1BG      | 0.1          | 0.5         | 0.6         | 5.6               | 6.7               |
| A1BG-AS1  | 0.0          | 0.1         | 0.2         | 6.9               | 11.5              |
| A2M       | 0.1          | 0.6         | 0.3         | 8.3               | 4.5               |
| AADAC     | 0.3          | 0.0         | 0.1         | 0.1               | 0.3               |
| AATK      | 0.1          | 0.1         | 0.1         | 2.3               | 2.0               |
| ABCA1     | 0.3          | 0.0         | 0.0         | 0.1               | 0.1               |
| ABCA2     | 0.9          | 2.4         | 2.6         | 2.8               | 3.0               |
| ABCA3     | 0.1          | 0.4         | 0.5         | 3.9               | 4.7               |
| ABCB10    | 83.4         | 41.6        | 39.6        | 0.5               | 0.5               |
| ABCB1     | 0.1          | 1.1         | 1.0         | 13.2              | 12.0              |
| ABCC13    | 0.1          | 0.0         | 0.0         | 0.2               | 0.1               |
| ABCC5-AS1 | 0.2          | 0.1         | 0.0         | 0.3               | #NAME?            |
| ABCC6     | 0.1          | 0.2         | 0.4         | 4.3               | 8.2               |
| ABCC9     | 0.6          | 1.7         | 1.5         | 2.9               | 2.5               |
| ABCG2     | 4.7          | 1.2         | 1.3         | 0.3               | 0.3               |
| ABHD12B   | 0.0          | 0.1         | 0.0         | Inf               | Inf               |
| ABLIM1    | 4.0          | 15.2        | 17.2        | 3.8               | 4.3               |
| ABR       | 1.4          | 4.8         | 5.6         | 3.4               | 3.9               |
| ABTB2     | 0.3          | 0.6         | 0.8         | 2.2               | 3.1               |
| ACCSL     | 0.0          | 0.0         | 0.2         | Inf               | Inf               |
| ACE       | 0.2          | 0.9         | 0.9         | 4.3               | 4.3               |
| ACHE      | 12.2         | 2.3         | 2.9         | 0.2               | 0.2               |
| ACPL2     | 0.3          | 0.1         | 0.1         | 0.3               | 0.3               |
| ACPP      | 0.6          | 0.1         | 0.1         | 0.1               | 0.1               |
| ACSL6     | 0.3          | 0.0         | 0.0         | 0.2               | 0.1               |
| ACSM3     | 4.5          | 13.1        | 12.4        | 2.9               | 2.8               |
| ACTL8     | 0.1          | 0.1         | 0.3         | 2.5               | 5.2               |
| ADAM10    | 8.4          | 20.3        | 18.8        | 2.4               | 2.2               |
| ADAM20P1  | 0.0          | 0.1         | 0.2         | 4.5               | 10.0              |
| ADAM22    | 0.3          | 0.7         | 0.6         | 2.6               | 2.2               |
| ADAM28    | 0.2          | 1.5         | 1.1         | 7.6               | 5.5               |
| ADAM32    | 0.2          | 0.4         | 0.4         | 2.3               | 2.1               |
| ADAMDEC1  | 0.0          | 0.1         | 0.0         | Inf               | Inf               |
| ADAMTS10  | 0.4          | 1.0         | 1.1         | 2.7               | 3.1               |
| ADAMTS1   | 0.0          | 0.1         | 0.1         | 2.8               | 6.7               |
| ADAP1     | 0.8          | 2.4         | 2.7         | 3.0               | 3.3               |
| ADARB1    | 3.3          | 6.9         | 7.1         | 2.1               | 2.2               |
| ADCY1     | 0.0          | 0.1         | 0.2         | 3.3               | 4.7               |
| ADCY6     | 2.2          | 5.7         | 5.9         | 2.6               | 2.7               |
| ADCY9     | 0.1          | 0.3         | 0.2         | 4.0               | 2.3               |
| ADCYAP1   | 0.2          | 0.9         | 0.9         | 4.5               | 4.4               |
| ADD1      | 73.0         | 33.5        | 36.3        | 0.5               | 0.5               |
| ADD2      | 130.8        | 54.8        | 63.1        | 0.4               | 0.5               |
| ADD3      | 11.3         | 5.2         | 5.4         | 0.5               | 0.5               |

|          |        |       |       |        |        |
|----------|--------|-------|-------|--------|--------|
| ADM2     | 0.4    | 0.1   | 0.1   | 0.2    | 0.3    |
| ADM      | 0.9    | 0.0   | 0.0   | #NAME? | #NAME? |
| ADORA3   | 0.1    | 0.6   | 0.5   | 5.3    | 4.1    |
| ADRA2A   | 0.6    | 3.0   | 3.1   | 5.0    | 5.1    |
| AEBP1    | 0.1    | 0.2   | 0.2   | 3.5    | 3.4    |
| AFF2     | 0.0    | 0.2   | 0.2   | 5.8    | 5.7    |
| AFF3     | 0.1    | 0.0   | 0.0   | 0.3    | 0.3    |
| AGAP1    | 0.8    | 0.3   | 0.3   | 0.5    | 0.4    |
| AGFG2    | 16.8   | 5.6   | 6.6   | 0.3    | 0.4    |
| AGPAT4   | 0.6    | 1.2   | 1.6   | 2.1    | 2.7    |
| AGPHD1   | 0.1    | 0.3   | 0.4   | 3.0    | 5.1    |
| AHCTF1P1 | 0.1    | 0.3   | 0.3   | 2.4    | 2.4    |
| AHCYL2   | 1.5    | 3.5   | 3.2   | 2.4    | 2.2    |
| AHRR     | 0.8    | 3.3   | 4.1   | 4.0    | 4.9    |
| AHSP     | 1538.0 | 583.6 | 627.8 | 0.4    | 0.4    |
| AIF1     | 1.5    | 15.6  | 13.7  | 10.5   | 9.2    |
| AIF1L    | 0.1    | 0.7   | 0.4   | 11.6   | 7.2    |
| AIFM2    | 18.0   | 6.7   | 7.6   | 0.4    | 0.4    |
| AIM1     | 4.0    | 1.4   | 1.4   | 0.4    | 0.4    |
| AJUBA    | 0.1    | 0.2   | 0.3   | 2.5    | 3.0    |
| AK1      | 31.6   | 11.0  | 11.4  | 0.3    | 0.4    |
| AK4      | 2.5    | 8.1   | 7.3   | 3.2    | 2.9    |
| AK8      | 0.3    | 0.7   | 0.6   | 2.6    | 2.5    |
| AKAP11   | 3.3    | 6.9   | 7.0   | 2.1    | 2.2    |
| AKAP12   | 0.3    | 1.5   | 1.1   | 4.5    | 3.4    |
| AKAP4    | 0.2    | 1.0   | 1.3   | 6.4    | 8.8    |
| AKAP9    | 1.8    | 5.7   | 5.5   | 3.2    | 3.1    |
| AKNA     | 0.5    | 1.1   | 1.1   | 2.2    | 2.2    |
| AKR1C1   | 14.4   | 51.4  | 45.0  | 3.6    | 3.1    |
| AKR7A2P1 | 0.4    | 0.1   | 0.1   | 0.3    | 0.2    |
| AKT3     | 0.2    | 2.3   | 2.0   | 9.3    | 8.3    |
| ALAD     | 110.8  | 24.4  | 25.9  | 0.2    | 0.2    |
| ALAS2    | 262.3  | 72.6  | 90.8  | 0.3    | 0.3    |
| ALDH2    | 0.7    | 2.4   | 2.3   | 3.2    | 3.0    |
| ALG1L2   | 0.2    | 0.4   | 0.4   | 2.1    | 2.0    |
| ALOX5    | 9.5    | 3.5   | 3.1   | 0.4    | 0.3    |
| ALOX5AP  | 2.4    | 13.0  | 9.7   | 5.4    | 4.0    |
| ALPL     | 2.9    | 0.6   | 0.4   | 0.2    | 0.1    |
| ALS2CL   | 0.0    | 0.1   | 0.1   | 13.4   | 11.8   |
| ALS2CR12 | 0.6    | 0.2   | 0.2   | 0.4    | 0.4    |
| AMH      | 0.0    | 0.2   | 0.2   | 3.2    | 4.9    |
| ANGPT1   | 0.6    | 4.8   | 3.3   | 7.7    | 5.2    |
| ANKDD1A  | 0.2    | 1.0   | 1.0   | 4.0    | 4.0    |
| ANKLE1   | 37.6   | 17.1  | 17.3  | 0.5    | 0.5    |
| ANKRD12  | 2.6    | 7.8   | 7.3   | 3.0    | 2.8    |
| ANKRD13B | 0.2    | 1.0   | 1.2   | 6.1    | 6.7    |
| ANKRD18A | 0.3    | 0.1   | 0.1   | 0.4    | 0.2    |

|            |      |       |      |      |      |
|------------|------|-------|------|------|------|
| ANKRD20A4  | 0.1  | 0.0   | 0.0  | 0.2  | 0.3  |
| ANKRD20A8f | 0.3  | 0.1   | 0.1  | 0.4  | 0.5  |
| ANKRD29    | 0.0  | 0.1   | 0.4  | 5.5  | 30.4 |
| ANKRD30BL  | 1.4  | 4.4   | 3.0  | 3.1  | 2.1  |
| ANKRD35    | 0.0  | 0.1   | 0.1  | 15.3 | 8.4  |
| ANKRD55    | 0.0  | 0.1   | 0.1  | 4.2  | 8.4  |
| ANKRD61    | 2.6  | 0.7   | 1.1  | 0.3  | 0.4  |
| ANKRD63    | 0.0  | 0.1   | 0.1  | 4.7  | 3.1  |
| ANKRD6     | 0.1  | 0.3   | 0.3  | 4.5  | 4.8  |
| ANKS6      | 0.1  | 0.3   | 0.3  | 2.8  | 3.1  |
| ANPEP      | 1.3  | 7.2   | 7.3  | 5.4  | 5.5  |
| ANTXR1     | 0.0  | 0.1   | 0.1  | 7.5  | 4.2  |
| ANXA2      | 46.3 | 111.4 | 94.6 | 2.4  | 2.0  |
| ANXA2P2    | 1.7  | 3.8   | 4.1  | 2.3  | 2.4  |
| ANXA3      | 0.1  | 0.4   | 0.3  | 3.3  | 2.3  |
| AOAH       | 0.1  | 0.4   | 0.6  | 4.7  | 6.3  |
| AP1S2      | 2.9  | 11.1  | 9.2  | 3.8  | 3.2  |
| AP3D1      | 36.0 | 15.5  | 17.7 | 0.4  | 0.5  |
| APBA2      | 1.7  | 6.1   | 7.4  | 3.5  | 4.3  |
| APC        | 2.7  | 7.1   | 7.3  | 2.6  | 2.7  |
| APOA1      | 0.0  | 0.2   | 0.2  | Inf  | Inf  |
| APOBEC2    | 0.7  | 0.4   | 0.2  | 0.5  | 0.3  |
| APP        | 20.5 | 48.4  | 49.0 | 2.4  | 2.4  |
| AQP1       | 5.6  | 0.9   | 0.7  | 0.2  | 0.1  |
| AQP5       | 0.0  | 0.1   | 0.1  | 3.4  | 2.1  |
| ARAP2      | 0.3  | 0.7   | 0.7  | 2.2  | 2.1  |
| ARG2       | 11.6 | 4.2   | 4.4  | 0.4  | 0.4  |
| ARHGAP22   | 2.1  | 6.3   | 5.5  | 3.1  | 2.7  |
| ARHGAP23   | 16.4 | 6.4   | 7.1  | 0.4  | 0.4  |
| ARHGAP25   | 3.5  | 8.5   | 9.6  | 2.4  | 2.7  |
| ARHGAP26   | 0.5  | 1.3   | 1.4  | 2.4  | 2.6  |
| ARHGAP27   | 0.5  | 1.2   | 1.2  | 2.4  | 2.4  |
| ARHGAP30   | 1.6  | 8.1   | 8.0  | 5.1  | 5.0  |
| ARHGAP31   | 0.4  | 0.9   | 0.9  | 2.4  | 2.6  |
| ARHGAP5    | 2.6  | 6.8   | 6.8  | 2.7  | 2.7  |
| ARHGAP8    | 1.4  | 0.4   | 0.5  | 0.3  | 0.3  |
| ARHGAP9    | 2.0  | 5.2   | 5.3  | 2.6  | 2.7  |
| ARHGEF10   | 0.2  | 1.0   | 1.0  | 4.5  | 4.4  |
| ARHGEF12   | 16.4 | 7.0   | 7.2  | 0.4  | 0.4  |
| ARHGEF17   | 0.0  | 0.3   | 0.4  | 18.2 | 19.9 |
| ARHGEF26   | 0.0  | 0.1   | 0.1  | 6.3  | 5.6  |
| ARHGEF35   | 0.2  | 0.1   | 0.1  | 0.5  | 0.3  |
| ARHGEF3    | 0.6  | 1.5   | 1.8  | 2.4  | 2.8  |
| ARHGEF40   | 0.2  | 0.8   | 0.9  | 3.6  | 3.8  |
| ARID5B     | 0.3  | 0.6   | 0.8  | 2.4  | 2.8  |
| ARL10      | 0.1  | 0.3   | 0.6  | 5.2  | 10.7 |
| ARL11      | 0.1  | 0.4   | 0.5  | 2.9  | 3.5  |

|            |      |      |      |      |     |
|------------|------|------|------|------|-----|
| ARL13A     | 0.1  | 0.0  | 0.0  | 0.2  | 0.4 |
| ARMCX1     | 0.3  | 1.2  | 1.0  | 3.8  | 3.1 |
| ARMCX5-GPF | 0.1  | 0.4  | 0.4  | 2.8  | 2.6 |
| ARRDC3     | 12.3 | 4.5  | 5.1  | 0.4  | 0.4 |
| ARSD       | 0.2  | 1.0  | 1.2  | 4.5  | 5.5 |
| ART4       | 4.1  | 0.2  | 0.6  | 0.1  | 0.1 |
| AS3MT      | 0.5  | 0.0  | 0.0  | 0.0  | 0.0 |
| ASAP2      | 0.5  | 1.2  | 1.3  | 2.5  | 2.7 |
| ASB9P1     | 0.1  | 0.1  | 0.1  | 2.3  | 2.1 |
| ASCL2      | 0.0  | 0.1  | 0.1  | 8.3  | 5.2 |
| ASIC1      | 0.0  | 0.1  | 0.1  | Inf  | Inf |
| ASNS       | 59.8 | 21.0 | 19.2 | 0.4  | 0.3 |
| ASPDH      | 0.0  | 0.2  | 0.1  | Inf  | Inf |
| ASPH       | 3.9  | 11.4 | 9.8  | 2.9  | 2.5 |
| ASPM       | 7.9  | 17.4 | 17.3 | 2.2  | 2.2 |
| ASS1       | 1.0  | 0.2  | 0.2  | 0.2  | 0.2 |
| ATF3       | 4.1  | 1.1  | 0.6  | 0.3  | 0.1 |
| ATG4D      | 16.6 | 6.2  | 7.0  | 0.4  | 0.4 |
| ATHL1      | 1.0  | 2.7  | 2.6  | 2.6  | 2.5 |
| ATP10D     | 0.9  | 2.3  | 2.0  | 2.4  | 2.1 |
| ATP1A3     | 0.1  | 0.5  | 0.4  | 7.0  | 5.9 |
| ATP1B2     | 8.2  | 3.1  | 3.3  | 0.4  | 0.4 |
| ATP1B4     | 0.4  | 2.1  | 2.1  | 5.8  | 5.8 |
| ATP2A3     | 7.0  | 20.4 | 22.2 | 2.9  | 3.2 |
| ATP6V0D2   | 0.0  | 0.2  | 0.1  | 17.3 | 6.3 |
| ATP6V1G2   | 0.1  | 0.6  | 0.5  | 5.3  | 4.1 |
| ATP8A1     | 0.9  | 2.1  | 1.9  | 2.2  | 2.1 |
| ATP8A2     | 0.0  | 0.1  | 0.1  | 20.3 | 9.5 |
| ATP8B2     | 3.7  | 9.9  | 11.2 | 2.7  | 3.0 |
| ATP8B4     | 0.7  | 1.7  | 1.4  | 2.5  | 2.1 |
| ATRX       | 2.6  | 9.0  | 8.9  | 3.5  | 3.4 |
| ATXN1      | 0.3  | 0.9  | 1.0  | 2.6  | 3.1 |
| AUTS2      | 0.5  | 1.2  | 2.3  | 2.3  | 4.3 |
| AVP        | 0.0  | 0.3  | 0.1  | Inf  | Inf |
| AVPR2      | 0.0  | 0.4  | 0.4  | Inf  | Inf |
| AZGP1      | 0.8  | 0.2  | 0.2  | 0.2  | 0.2 |
| AZU1       | 1.4  | 4.4  | 4.6  | 3.2  | 3.3 |
| B3GNT1     | 3.3  | 1.3  | 1.5  | 0.4  | 0.5 |
| BACH2      | 0.0  | 0.1  | 0.1  | 3.5  | 3.3 |
| BAIAP2-AS1 | 0.6  | 1.4  | 1.4  | 2.2  | 2.2 |
| BANK1      | 0.5  | 2.0  | 2.7  | 3.9  | 5.4 |
| BASP1      | 0.3  | 1.4  | 1.1  | 4.9  | 3.9 |
| BAZ2B      | 2.1  | 4.6  | 4.7  | 2.2  | 2.2 |
| BCAS4      | 0.3  | 0.7  | 0.9  | 2.2  | 3.2 |
| BCL2A1     | 0.0  | 0.3  | 0.2  | Inf  | Inf |
| BCL6       | 0.9  | 0.1  | 0.1  | 0.1  | 0.1 |
| BCRP3      | 0.2  | 0.6  | 0.7  | 2.7  | 3.2 |

|              |       |       |       |        |        |
|--------------|-------|-------|-------|--------|--------|
| BDNF-AS      | 0.1   | 0.5   | 0.4   | 4.0    | 3.6    |
| BDNF         | 0.1   | 0.5   | 0.6   | 3.7    | 4.4    |
| BDP1         | 3.6   | 8.3   | 8.1   | 2.3    | 2.2    |
| BEGAIN       | 0.4   | 1.1   | 1.0   | 2.5    | 2.2    |
| BEND4        | 0.0   | 0.5   | 0.5   | 17.3   | 18.8   |
| BEND6        | 0.0   | 0.1   | 0.2   | 3.2    | 6.3    |
| BEST3        | 0.2   | 0.0   | 0.0   | 0.1    | 0.3    |
| BHLHE40-AS:  | 0.0   | 0.1   | 0.2   | Inf    | Inf    |
| BIN1         | 0.2   | 0.5   | 0.7   | 3.0    | 4.5    |
| BLVRB        | 899.3 | 318.2 | 378.3 | 0.4    | 0.4    |
| BMX          | 0.2   | 0.6   | 0.6   | 2.5    | 2.8    |
| BOD1L1       | 4.3   | 9.6   | 9.2   | 2.2    | 2.1    |
| BRCA2        | 2.1   | 4.8   | 4.9   | 2.3    | 2.4    |
| BRDT         | 0.0   | 0.1   | 0.0   | 13.2   | 4.2    |
| BRSK1        | 0.0   | 0.1   | 0.1   | 6.3    | 7.4    |
| BST1         | 0.3   | 1.6   | 1.2   | 4.7    | 3.7    |
| BTBD19       | 0.4   | 0.9   | 0.9   | 2.2    | 2.0    |
| BTC          | 0.0   | 0.2   | 0.1   | 6.1    | 4.1    |
| BTG2         | 32.0  | 11.2  | 10.8  | 0.4    | 0.3    |
| C10orf118    | 0.6   | 2.6   | 2.7   | 4.2    | 4.4    |
| C10orf25     | 0.0   | 0.1   | 0.1   | 4.4    | 3.5    |
| C10orf32-AS: | 0.0   | 0.4   | 0.3   | 3053.3 | 2434.1 |
| C10orf68     | 0.1   | 0.4   | 0.3   | 2.9    | 2.4    |
| C11orf84     | 2.8   | 6.3   | 5.8   | 2.3    | 2.1    |
| C12orf69     | 0.1   | 0.0   | 0.0   | #NAME? | 0.3    |
| C12orf71     | 0.0   | 0.2   | 0.2   | Inf    | Inf    |
| C12orf76     | 2.0   | 4.5   | 5.5   | 2.2    | 2.7    |
| C15orf52     | 0.2   | 0.4   | 0.5   | 2.2    | 2.8    |
| C17orf50     | 0.0   | 0.1   | 0.3   | 3.4    | 9.2    |
| C17orf51     | 0.1   | 0.0   | 0.1   | 0.2    | 0.4    |
| C17orf61-PLS | 0.9   | 0.0   | 0.0   | 0.0    | 0.0    |
| C17orf67     | 0.2   | 1.0   | 0.8   | 5.6    | 4.4    |
| C17orf99     | 2.4   | 1.0   | 0.8   | 0.4    | 0.3    |
| C19orf33     | 0.9   | 2.4   | 2.0   | 2.7    | 2.2    |
| C19orf35     | 0.2   | 0.7   | 0.4   | 3.3    | 2.0    |
| C19orf38     | 0.2   | 0.4   | 1.0   | 2.6    | 6.4    |
| C19orf59     | 0.0   | 0.4   | 0.4   | 15.6   | 14.5   |
| C19orf77     | 0.2   | 1.3   | 1.6   | 8.3    | 10.5   |
| C1orf114     | 0.1   | 0.4   | 0.2   | 5.7    | 2.6    |
| C1orf115     | 0.0   | 0.5   | 0.3   | 22.6   | 13.1   |
| C1orf145     | 0.1   | 0.6   | 0.2   | 11.0   | 3.3    |
| C1orf151-NB  | 0.5   | 3.1   | 2.4   | 5.9    | 4.6    |
| C1orf162     | 0.8   | 2.9   | 2.5   | 3.5    | 3.1    |
| C1orf186     | 8.4   | 3.9   | 3.0   | 0.5    | 0.4    |
| C1orf227     | 0.2   | 0.0   | 0.0   | #NAME? | #NAME? |
| C1orf228     | 0.4   | 1.0   | 0.8   | 2.6    | 2.0    |
| C1QA         | 0.0   | 0.1   | 0.0   | Inf    | Inf    |

|           |       |      |      |        |        |
|-----------|-------|------|------|--------|--------|
| C1QB      | 0.0   | 0.3  | 0.1  | Inf    | Inf    |
| C1QC      | 0.0   | 0.3  | 0.3  | Inf    | Inf    |
| C1QL3     | 0.3   | 0.7  | 0.8  | 2.3    | 2.8    |
| C1QTNF9B  | 0.1   | 0.4  | 0.6  | 2.5    | 4.1    |
| C20orf197 | 0.7   | 4.8  | 4.0  | 6.6    | 5.5    |
| C20orf203 | 0.1   | 0.3  | 0.3  | 3.8    | 4.1    |
| C21orf91  | 1.6   | 5.2  | 5.5  | 3.3    | 3.4    |
| C2CD4B    | 0.3   | 0.0  | 0.0  | 0.1    | #NAME? |
| C2orf70   | 0.0   | 0.1  | 0.4  | Inf    | Inf    |
| C2orf81   | 0.0   | 0.2  | 0.1  | 8.6    | 4.7    |
| C2orf82   | 0.3   | 0.1  | 0.0  | 0.2    | #NAME? |
| C2orf83   | 0.0   | 0.1  | 0.2  | 3.1    | 5.2    |
| C3        | 0.0   | 0.5  | 0.4  | 9.8    | 9.6    |
| C3orf14   | 2.3   | 6.2  | 7.0  | 2.6    | 3.0    |
| C3orf27   | 0.0   | 0.1  | 0.3  | 4.9    | 12.1   |
| C3orf55   | 0.1   | 0.3  | 0.5  | 2.7    | 4.1    |
| C3orf80   | 1.6   | 5.2  | 4.0  | 3.3    | 2.5    |
| C4orf26   | 0.2   | 0.0  | 0.1  | 0.1    | 0.5    |
| C5        | 0.2   | 0.5  | 0.5  | 2.2    | 2.1    |
| C5orf4    | 31.9  | 14.6 | 14.5 | 0.5    | 0.5    |
| C6orf165  | 0.0   | 0.1  | 0.1  | 2.3    | 2.4    |
| C6orf25   | 4.9   | 16.0 | 15.8 | 3.3    | 3.3    |
| C7orf53   | 0.2   | 0.5  | 0.6  | 2.7    | 2.8    |
| C9orf117  | 0.1   | 0.2  | 0.4  | 3.0    | 7.3    |
| C9orf131  | 0.1   | 0.3  | 0.2  | 4.6    | 3.3    |
| C9orf139  | 0.1   | 0.3  | 0.2  | 4.8    | 3.2    |
| C9orf171  | 0.2   | 0.0  | 0.1  | #NAME? | 0.4    |
| C9orf24   | 0.1   | 0.3  | 0.3  | 6.0    | 5.5    |
| C9orf89   | 9.4   | 19.0 | 21.1 | 2.0    | 2.3    |
| C9orf91   | 0.8   | 0.3  | 0.4  | 0.4    | 0.5    |
| CA11      | 1.5   | 3.4  | 3.7  | 2.2    | 2.4    |
| CA1       | 490.7 | 42.0 | 35.3 | 0.1    | 0.1    |
| CA2       | 270.7 | 56.3 | 48.6 | 0.2    | 0.2    |
| CA3       | 2.1   | 0.6  | 0.6  | 0.3    | 0.3    |
| CABLES1   | 3.3   | 7.4  | 6.9  | 2.2    | 2.1    |
| CABP5     | 0.1   | 0.0  | 0.0  | 0.3    | #NAME? |
| CABP7     | 0.1   | 0.8  | 0.8  | 8.1    | 7.8    |
| CABYR     | 0.0   | 0.1  | 0.1  | 2.7    | 3.4    |
| CACNA2D2  | 0.1   | 0.2  | 0.3  | 2.5    | 3.8    |
| CACNB3    | 0.3   | 1.3  | 1.8  | 4.2    | 5.8    |
| CACNB4    | 0.0   | 0.1  | 0.1  | 5.3    | 5.5    |
| CAHM      | 0.3   | 1.1  | 1.0  | 3.7    | 3.6    |
| CALB1     | 19.3  | 45.3 | 46.6 | 2.3    | 2.4    |
| CALB2     | 0.8   | 3.7  | 3.2  | 4.4    | 3.9    |
| CALD1     | 0.2   | 0.4  | 0.4  | 2.2    | 2.2    |
| CAMKK1    | 1.4   | 3.6  | 4.1  | 2.5    | 2.9    |
| CAPSL     | 0.2   | 0.9  | 1.1  | 4.0    | 5.3    |

|          |      |      |      |        |        |
|----------|------|------|------|--------|--------|
| CARD10   | 0.3  | 0.9  | 1.0  | 3.6    | 3.7    |
| CARD11   | 2.4  | 10.2 | 11.6 | 4.2    | 4.8    |
| CASP1    | 0.3  | 1.7  | 1.6  | 5.3    | 5.0    |
| CAV1     | 0.3  | 2.7  | 2.4  | 9.7    | 8.5    |
| CBFB     | 8.8  | 22.2 | 18.0 | 2.5    | 2.0    |
| CBR3     | 0.0  | 0.1  | 0.4  | Inf    | Inf    |
| CBS      | 15.4 | 6.0  | 5.1  | 0.4    | 0.3    |
| CBWD6    | 0.1  | 0.7  | 0.9  | 8.8    | 12.0   |
| CBX7     | 5.2  | 2.1  | 2.4  | 0.4    | 0.5    |
| CCBP2    | 0.2  | 1.0  | 1.3  | 4.1    | 5.3    |
| CCDC102A | 0.1  | 0.5  | 0.4  | 5.7    | 4.3    |
| CCDC103  | 0.2  | 0.8  | 0.6  | 3.3    | 2.3    |
| CCDC13   | 0.1  | 0.4  | 0.3  | 3.7    | 2.2    |
| CCDC146  | 0.1  | 0.6  | 0.5  | 4.9    | 3.8    |
| CCDC152  | 0.3  | 0.7  | 0.8  | 2.2    | 2.2    |
| CCDC153  | 0.2  | 0.0  | 0.0  | 0.2    | #NAME? |
| CCDC171  | 0.4  | 1.3  | 1.4  | 3.1    | 3.3    |
| CCDC173  | 0.1  | 0.8  | 0.8  | 6.1    | 6.4    |
| CCDC175  | 0.0  | 0.2  | 0.1  | 6.2    | 2.8    |
| CCDC18   | 2.2  | 6.3  | 6.5  | 2.8    | 2.9    |
| CCDC19   | 0.3  | 0.7  | 0.8  | 2.3    | 2.4    |
| CCDC39   | 0.3  | 1.2  | 1.1  | 3.9    | 3.5    |
| CCDC54   | 0.1  | 0.0  | 0.1  | #NAME? | 0.4    |
| CCDC62   | 0.0  | 0.1  | 0.1  | 6.8    | 3.4    |
| CCDC64   | 0.0  | 0.2  | 0.5  | 5.4    | 12.1   |
| CCDC65   | 0.1  | 0.3  | 0.4  | 4.5    | 5.2    |
| CCDC74A  | 0.1  | 0.5  | 0.8  | 6.9    | 11.4   |
| CCDC78   | 1.0  | 2.8  | 2.5  | 2.7    | 2.4    |
| CCDC88A  | 4.8  | 12.7 | 12.0 | 2.6    | 2.5    |
| CCL16    | 0.2  | 0.0  | 0.0  | 0.3    | 0.3    |
| CCL1     | 1.5  | 5.7  | 6.0  | 3.8    | 4.0    |
| CCL27    | 0.1  | 0.0  | 0.0  | #NAME? | #NAME? |
| CCL2     | 0.2  | 0.6  | 1.1  | 3.0    | 5.3    |
| CCL3     | 0.0  | 0.3  | 0.8  | 5.9    | 16.2   |
| CCND1    | 1.8  | 5.7  | 5.1  | 3.3    | 2.9    |
| CCNJL    | 0.1  | 0.6  | 0.6  | 9.6    | 9.5    |
| CCR10    | 0.4  | 0.1  | 0.1  | 0.3    | 0.2    |
| CCR1     | 0.0  | 0.3  | 0.2  | 7.3    | 3.7    |
| CCT6B    | 0.7  | 1.4  | 1.5  | 2.1    | 2.2    |
| CD109    | 0.9  | 2.6  | 2.7  | 2.9    | 3.0    |
| CD14     | 0.1  | 0.3  | 0.3  | 4.7    | 5.5    |
| CD163    | 0.0  | 0.2  | 0.0  | Inf    | Inf    |
| CD1D     | 0.3  | 0.1  | 0.1  | 0.3    | 0.5    |
| CD200R1  | 0.1  | 0.2  | 0.3  | 3.2    | 5.0    |
| CD200R1L | 0.1  | 0.4  | 0.5  | 4.9    | 6.4    |
| CD226    | 0.5  | 1.6  | 1.1  | 3.3    | 2.2    |
| CD27     | 0.3  | 1.2  | 0.7  | 3.8    | 2.2    |

|          |      |      |      |        |        |
|----------|------|------|------|--------|--------|
| CD300A   | 0.6  | 2.4  | 2.2  | 3.8    | 3.5    |
| CD300LF  | 0.2  | 0.6  | 0.8  | 3.2    | 4.5    |
| CD34     | 0.2  | 2.0  | 2.0  | 13.3   | 13.0   |
| CD38     | 0.1  | 3.9  | 2.9  | 59.2   | 43.6   |
| CD3D     | 0.0  | 0.4  | 0.1  | Inf    | Inf    |
| CD3G     | 0.0  | 0.1  | 0.1  | 4.1    | 4.1    |
| CD48     | 0.2  | 1.3  | 1.5  | 8.7    | 9.7    |
| CD4      | 2.8  | 7.9  | 7.6  | 2.8    | 2.7    |
| CD68     | 12.6 | 29.2 | 31.7 | 2.3    | 2.5    |
| CD69     | 4.7  | 11.0 | 10.9 | 2.4    | 2.3    |
| CD72     | 0.1  | 0.2  | 0.3  | 2.1    | 2.5    |
| CD74     | 10.0 | 90.6 | 90.9 | 9.0    | 9.1    |
| CD79A    | 0.1  | 0.3  | 0.3  | 2.4    | 2.3    |
| CD79B    | 0.1  | 0.5  | 0.8  | 4.2    | 7.1    |
| CD7      | 0.0  | 0.2  | 0.2  | Inf    | Inf    |
| CD96     | 0.5  | 4.4  | 4.9  | 9.0    | 10.0   |
| CD9      | 12.9 | 48.7 | 46.8 | 3.8    | 3.6    |
| CDC42EP3 | 1.2  | 2.9  | 2.7  | 2.4    | 2.3    |
| CDH12    | 0.0  | 0.2  | 0.2  | 4.7    | 5.9    |
| CDH1     | 36.8 | 16.3 | 17.2 | 0.4    | 0.5    |
| CDHR1    | 0.1  | 1.0  | 1.0  | 9.3    | 9.1    |
| CDHR4    | 0.0  | 0.1  | 0.1  | 3.0    | 2.4    |
| CDK18    | 0.1  | 0.3  | 0.4  | 3.4    | 3.7    |
| CDKN1C   | 1.8  | 7.8  | 7.8  | 4.3    | 4.3    |
| CDRT4    | 0.0  | 0.3  | 0.9  | 2049.3 | 6278.2 |
| CDSN     | 1.6  | 0.5  | 0.6  | 0.3    | 0.4    |
| CEACAM4  | 0.0  | 0.1  | 0.1  | 2.7    | 5.2    |
| CEBPA    | 0.4  | 2.3  | 2.1  | 5.7    | 5.2    |
| CEBPD    | 1.0  | 0.4  | 0.3  | 0.4    | 0.3    |
| CECR1    | 0.1  | 0.8  | 0.7  | 6.0    | 5.3    |
| CECR5    | 1.7  | 4.6  | 4.6  | 2.7    | 2.6    |
| CELA2A   | 6.5  | 20.4 | 16.4 | 3.1    | 2.5    |
| CELA2B   | 6.4  | 23.9 | 24.3 | 3.8    | 3.8    |
| CELF2    | 9.6  | 25.0 | 24.0 | 2.6    | 2.5    |
| CELF3    | 0.2  | 0.0  | 0.0  | 0.0    | 0.1    |
| CELF6    | 0.3  | 0.8  | 0.7  | 2.9    | 2.6    |
| CELSR1   | 0.1  | 0.2  | 0.1  | 2.4    | 2.0    |
| CENPE    | 4.5  | 10.3 | 9.5  | 2.3    | 2.1    |
| CENPF    | 13.5 | 32.3 | 32.7 | 2.4    | 2.4    |
| CEP170B  | 0.1  | 0.4  | 0.4  | 4.4    | 4.5    |
| CEP290   | 1.2  | 3.9  | 3.3  | 3.3    | 2.8    |
| CEP70    | 4.2  | 10.4 | 8.5  | 2.5    | 2.0    |
| CERCAM   | 0.2  | 0.9  | 1.3  | 4.0    | 5.6    |
| CERK     | 1.1  | 3.0  | 3.0  | 2.8    | 2.7    |
| CERS1    | 0.0  | 0.1  | 0.1  | Inf    | Inf    |
| CERS4    | 1.6  | 5.2  | 4.0  | 3.3    | 2.5    |
| CES3     | 0.3  | 0.7  | 1.0  | 2.2    | 3.1    |



|           |       |       |       |      |      |
|-----------|-------|-------|-------|------|------|
| CFH       | 0.1   | 1.1   | 1.6   | 12.4 | 18.4 |
| CFHR1     | 0.0   | 0.1   | 0.1   | Inf  | Inf  |
| CFLAR-AS1 | 0.0   | 0.1   | 0.2   | 2.0  | 6.2  |
| CGREF1    | 3.5   | 8.6   | 8.4   | 2.4  | 2.4  |
| CHAC1     | 5.0   | 0.6   | 0.4   | 0.1  | 0.1  |
| CHD9      | 3.3   | 8.6   | 9.0   | 2.6  | 2.7  |
| CHDH      | 0.0   | 0.1   | 0.1   | 2.6  | 2.3  |
| CHI3L1    | 0.0   | 0.0   | 0.2   | Inf  | Inf  |
| CHIC1     | 0.6   | 2.1   | 2.0   | 3.5  | 3.2  |
| CHM       | 1.3   | 2.8   | 2.7   | 2.1  | 2.0  |
| CHML      | 2.2   | 4.6   | 4.5   | 2.1  | 2.0  |
| CHPF      | 0.6   | 2.1   | 1.9   | 3.5  | 3.1  |
| CHRFAM7A  | 0.2   | 0.4   | 0.4   | 2.5  | 2.7  |
| CHRNA6    | 0.0   | 0.4   | 0.3   | 11.1 | 8.2  |
| CHRNA7    | 0.1   | 0.3   | 0.3   | 2.9  | 2.6  |
| CHST13    | 0.8   | 1.8   | 2.5   | 2.1  | 2.9  |
| CHST7     | 0.1   | 0.4   | 0.7   | 2.7  | 4.9  |
| CHSY3     | 0.0   | 0.1   | 0.1   | 3.5  | 6.3  |
| CIITA     | 0.1   | 1.1   | 1.3   | 15.2 | 18.6 |
| CITED2    | 131.9 | 61.6  | 60.4  | 0.5  | 0.5  |
| CKAP4     | 0.7   | 2.4   | 2.1   | 3.3  | 2.9  |
| CLC       | 70.7  | 329.1 | 275.5 | 4.7  | 3.9  |
| CLCNKA    | 0.0   | 0.1   | 0.2   | Inf  | Inf  |
| CLCNKB    | 0.2   | 1.0   | 1.1   | 4.9  | 5.5  |
| CLDN11    | 0.9   | 0.0   | 0.1   | 0.0  | 0.1  |
| CLDN14    | 0.0   | 0.1   | 0.3   | 4.7  | 10.4 |
| CLDN16    | 0.0   | 0.1   | 0.1   | 5.1  | 4.6  |
| CLDN3     | 0.8   | 0.1   | 0.3   | 0.1  | 0.3  |
| CLDN4     | 0.2   | 0.1   | 0.0   | 0.3  | 0.1  |
| CLDN7     | 0.9   | 0.1   | 0.4   | 0.2  | 0.5  |
| CLDND2    | 0.2   | 0.6   | 0.5   | 3.4  | 2.9  |
| CLEC12A   | 0.3   | 1.1   | 1.1   | 4.2  | 4.5  |
| CLEC12B   | 0.0   | 0.2   | 0.2   | Inf  | Inf  |
| CLEC2B    | 2.2   | 8.1   | 6.1   | 3.7  | 2.8  |
| CLEC3B    | 0.0   | 0.3   | 0.4   | Inf  | Inf  |
| CLEC5A    | 0.0   | 0.2   | 0.1   | 20.2 | 10.5 |
| CLSTN1    | 3.8   | 8.3   | 8.4   | 2.2  | 2.2  |
| CLSTN3    | 2.9   | 6.0   | 6.6   | 2.1  | 2.3  |
| CLU       | 5.1   | 35.7  | 34.9  | 7.0  | 6.8  |
| CMKLR1    | 0.1   | 0.4   | 0.2   | 4.2  | 2.2  |
| CMTM3     | 2.3   | 11.9  | 12.5  | 5.1  | 5.4  |
| CMTM5     | 2.8   | 9.9   | 10.5  | 3.6  | 3.8  |
| CMTM6     | 10.8  | 32.5  | 27.4  | 3.0  | 2.5  |
| CNFN      | 0.2   | 1.0   | 1.8   | 6.0  | 10.8 |
| CNGA1     | 0.0   | 0.1   | 0.1   | Inf  | Inf  |
| CNGA4     | 0.0   | 0.0   | 0.1   | Inf  | Inf  |
| CNKSR2    | 0.0   | 0.2   | 0.1   | 4.3  | 2.8  |

|             |      |      |      |        |        |
|-------------|------|------|------|--------|--------|
| CNN1        | 0.1  | 0.0  | 0.0  | #NAME? | 0.2    |
| CNNM1       | 0.2  | 0.5  | 0.7  | 2.6    | 3.5    |
| CNR2        | 0.1  | 0.3  | 0.4  | 3.1    | 3.3    |
| CNTD2       | 0.0  | 0.1  | 0.1  | Inf    | Inf    |
| CNTNAP1     | 0.5  | 0.2  | 0.2  | 0.3    | 0.4    |
| CNTRL       | 4.5  | 9.3  | 9.4  | 2.1    | 2.1    |
| COL18A1-AS1 | 0.2  | 0.0  | 0.0  | 0.3    | #NAME? |
| COL6A1      | 0.0  | 0.2  | 0.1  | 21.6   | 20.0   |
| COL6A3      | 0.1  | 0.2  | 0.2  | 2.1    | 2.1    |
| COL6A5      | 0.6  | 1.3  | 1.5  | 2.2    | 2.5    |
| COL6A6      | 0.1  | 0.1  | 0.2  | 2.6    | 4.4    |
| COLEC12     | 0.0  | 0.1  | 0.2  | 3.1    | 9.5    |
| COLQ        | 1.9  | 5.3  | 5.7  | 2.8    | 3.0    |
| COMMD3-BN   | 3.4  | 7.4  | 8.0  | 2.2    | 2.3    |
| COMTD1      | 11.7 | 5.7  | 4.8  | 0.5    | 0.4    |
| CORO1A      | 4.1  | 11.3 | 11.9 | 2.7    | 2.9    |
| CORO7-PAM   | 0.3  | 0.0  | 0.0  | 0.0    | 0.0    |
| COTL1       | 2.8  | 11.1 | 14.1 | 4.0    | 5.1    |
| CPA3        | 8.6  | 33.5 | 25.3 | 3.9    | 3.0    |
| CPB2        | 0.0  | 0.1  | 0.2  | Inf    | Inf    |
| CPEB4       | 14.9 | 6.7  | 6.6  | 0.4    | 0.4    |
| CPNE2       | 0.1  | 0.4  | 0.6  | 5.9    | 8.2    |
| CPNE5       | 0.1  | 0.2  | 0.2  | 3.9    | 4.4    |
| CPNE7       | 0.0  | 0.6  | 0.6  | Inf    | Inf    |
| CPNE8       | 2.0  | 5.9  | 5.3  | 3.0    | 2.7    |
| CPS1        | 0.2  | 0.6  | 0.7  | 2.5    | 3.2    |
| CPSF4L      | 0.1  | 0.0  | 0.0  | #NAME? | #NAME? |
| CPXM1       | 0.4  | 5.3  | 5.8  | 14.6   | 15.9   |
| CR1L        | 7.7  | 2.1  | 2.3  | 0.3    | 0.3    |
| CREB3L1     | 2.2  | 0.9  | 0.9  | 0.4    | 0.4    |
| CREB3L3     | 0.5  | 1.3  | 1.4  | 2.6    | 2.9    |
| CRIM1       | 5.9  | 2.8  | 2.7  | 0.5    | 0.5    |
| CRIP1       | 4.5  | 20.4 | 19.8 | 4.5    | 4.4    |
| CRIP2       | 0.4  | 0.1  | 0.2  | 0.3    | 0.5    |
| CRISPLD1    | 0.4  | 2.4  | 2.1  | 5.3    | 4.8    |
| CRMP1       | 0.0  | 0.1  | 0.1  | 5.2    | 3.2    |
| CRSP8P      | 0.0  | 0.0  | 0.1  | 2.0    | 5.2    |
| CRYBG3      | 0.0  | 0.2  | 0.1  | 11.8   | 4.2    |
| CRYGD       | 0.2  | 1.4  | 1.0  | 6.5    | 4.5    |
| CRYM-AS1    | 0.0  | 0.1  | 0.3  | Inf    | Inf    |
| CSF3R       | 0.1  | 0.9  | 0.5  | 14.8   | 8.6    |
| CSRP3       | 0.1  | 1.0  | 0.5  | 7.6    | 3.5    |
| CST7        | 32.7 | 70.7 | 70.9 | 2.2    | 2.2    |
| CSTA        | 0.0  | 0.4  | 0.2  | 9.3    | 5.1    |
| CTDSPL      | 3.5  | 9.9  | 9.7  | 2.8    | 2.8    |
| CTH         | 3.9  | 1.5  | 1.7  | 0.4    | 0.4    |
| CTSE        | 2.7  | 0.2  | 0.2  | 0.1    | 0.1    |

|            |       |      |      |      |      |
|------------|-------|------|------|------|------|
| CTSG       | 0.3   | 3.7  | 2.8  | 10.8 | 7.9  |
| CTSH       | 4.1   | 11.3 | 11.6 | 2.7  | 2.8  |
| CTSW       | 6.1   | 23.4 | 23.5 | 3.9  | 3.9  |
| CTTNBP2    | 0.9   | 2.4  | 2.1  | 2.6  | 2.2  |
| CTTNBP2NL  | 0.3   | 0.6  | 0.6  | 2.1  | 2.2  |
| CTXN1      | 1.2   | 2.7  | 3.7  | 2.2  | 3.0  |
| CX3CR1     | 0.0   | 0.5  | 0.5  | 9.2  | 9.5  |
| CXADR      | 1.0   | 2.2  | 2.9  | 2.2  | 3.0  |
| CXCL1      | 0.1   | 0.4  | 0.3  | 2.5  | 2.1  |
| CXCL5      | 0.0   | 0.2  | 0.1  | 6.9  | 4.7  |
| CXCR2      | 0.0   | 0.1  | 0.1  | 2.1  | 2.7  |
| CXCR2P1    | 0.2   | 0.4  | 0.5  | 2.2  | 3.0  |
| CXCR4      | 4.6   | 15.3 | 14.2 | 3.4  | 3.1  |
| CXCR6      | 0.2   | 0.0  | 0.0  | 0.1  | 0.2  |
| CYB5A      | 57.5  | 28.6 | 27.7 | 0.5  | 0.5  |
| CYBA       | 4.6   | 16.1 | 15.9 | 3.5  | 3.4  |
| CYFIP2     | 1.3   | 4.7  | 4.9  | 3.6  | 3.8  |
| CYP1B1-AS1 | 0.0   | 0.1  | 0.1  | Inf  | Inf  |
| CYP1B1     | 7.4   | 26.6 | 28.0 | 3.6  | 3.8  |
| CYP27A1    | 0.0   | 0.2  | 0.1  | Inf  | Inf  |
| CYP2U1     | 0.0   | 0.3  | 0.2  | 10.1 | 5.9  |
| CYP3A5     | 0.2   | 0.6  | 0.5  | 3.0  | 2.4  |
| CYP4F11    | 0.2   | 0.8  | 0.6  | 4.4  | 3.3  |
| CYP4F35P   | 0.1   | 0.0  | 0.0  | 0.2  | 0.2  |
| CYP4F3     | 0.7   | 2.6  | 2.4  | 3.7  | 3.4  |
| CYP7B1     | 0.3   | 1.3  | 1.2  | 4.0  | 3.6  |
| CYSLTR1    | 0.0   | 0.4  | 0.2  | 8.9  | 5.7  |
| CYSLTR2    | 0.1   | 0.6  | 0.4  | 7.2  | 5.1  |
| CYSTM1     | 14.2  | 5.5  | 5.4  | 0.4  | 0.4  |
| CYTH4      | 0.4   | 1.0  | 1.1  | 2.3  | 2.5  |
| CYYR1      | 0.0   | 0.0  | 0.1  | Inf  | Inf  |
| DAB2       | 0.8   | 2.4  | 2.3  | 3.0  | 2.9  |
| DACT1      | 0.2   | 0.3  | 0.4  | 2.0  | 2.5  |
| DACT3      | 0.0   | 0.2  | 0.3  | 7.3  | 12.1 |
| DAPP1      | 0.9   | 3.7  | 3.5  | 4.0  | 3.9  |
| DBN1       | 0.4   | 3.2  | 3.5  | 8.7  | 9.3  |
| DBNDD1     | 0.0   | 0.0  | 0.2  | 2.1  | 12.5 |
| DCAF11     | 52.4  | 22.0 | 25.8 | 0.4  | 0.5  |
| DCAF4L1    | 0.0   | 0.2  | 0.1  | 5.2  | 3.3  |
| DCLK2      | 0.0   | 0.2  | 0.3  | Inf  | Inf  |
| DDAH2      | 5.9   | 14.0 | 15.5 | 2.4  | 2.7  |
| DDIT3      | 23.6  | 11.1 | 8.8  | 0.5  | 0.4  |
| DDIT4      | 132.2 | 28.7 | 31.8 | 0.2  | 0.2  |
| DEFB124    | 0.0   | 1.5  | 0.9  | Inf  | Inf  |
| DENND1C    | 0.2   | 1.9  | 1.3  | 9.4  | 6.4  |
| DENND3     | 1.0   | 2.6  | 2.4  | 2.5  | 2.4  |
| DENND6B    | 0.2   | 1.3  | 1.3  | 5.8  | 5.8  |

|            |      |      |      |      |      |
|------------|------|------|------|------|------|
| DFNB59     | 0.3  | 0.8  | 0.8  | 2.9  | 3.0  |
| DGAT2L6    | 0.0  | 0.5  | 0.3  | 25.4 | 14.6 |
| DGKE       | 1.3  | 3.5  | 2.9  | 2.6  | 2.1  |
| DHH        | 0.0  | 0.1  | 0.2  | 2.8  | 6.3  |
| DHRS13     | 37.7 | 15.7 | 16.5 | 0.4  | 0.4  |
| DHRS2      | 2.1  | 0.3  | 0.3  | 0.1  | 0.1  |
| DHRS3      | 1.1  | 0.2  | 0.1  | 0.2  | 0.1  |
| DHRS9      | 0.1  | 0.0  | 0.0  | 0.1  | 0.2  |
| DIAPH3-AS1 | 3.4  | 1.2  | 0.6  | 0.4  | 0.2  |
| DIP2A-IT1  | 0.0  | 0.1  | 0.2  | Inf  | Inf  |
| DIRAS1     | 0.7  | 2.2  | 2.4  | 3.3  | 3.6  |
| DISC1      | 0.1  | 0.3  | 0.5  | 3.1  | 4.9  |
| DISP1      | 0.1  | 0.3  | 0.3  | 2.4  | 2.9  |
| DKK1       | 0.1  | 0.1  | 0.1  | 2.5  | 2.8  |
| DLC1       | 9.3  | 19.3 | 19.7 | 2.1  | 2.1  |
| DLG3       | 0.1  | 0.5  | 0.2  | 6.6  | 2.2  |
| DLGAP1-AS3 | 0.0  | 0.1  | 0.1  | Inf  | Inf  |
| DLK1       | 0.0  | 0.1  | 0.3  | 3.1  | 7.8  |
| DLX1       | 0.0  | 0.0  | 0.1  | Inf  | Inf  |
| DMXL2      | 0.2  | 0.4  | 0.4  | 2.4  | 2.3  |
| DNAI2      | 0.0  | 0.2  | 0.1  | 4.6  | 2.1  |
| DNAJB14    | 3.2  | 8.6  | 8.0  | 2.7  | 2.5  |
| DNAJB2     | 8.4  | 2.8  | 4.1  | 0.3  | 0.5  |
| DNAJC12    | 3.0  | 6.3  | 6.8  | 2.1  | 2.3  |
| DNAJC18    | 0.4  | 1.0  | 0.8  | 2.5  | 2.1  |
| DNALI1     | 0.1  | 0.1  | 0.2  | 2.1  | 3.4  |
| DNM1       | 0.2  | 1.8  | 2.1  | 10.1 | 11.8 |
| DNM3       | 1.0  | 3.5  | 3.7  | 3.4  | 3.5  |
| DOCK1      | 0.2  | 1.1  | 0.8  | 4.8  | 3.6  |
| DOK4       | 0.2  | 0.5  | 0.8  | 2.1  | 3.4  |
| DPF3       | 1.5  | 0.4  | 0.6  | 0.2  | 0.4  |
| DPP10      | 0.1  | 0.3  | 0.2  | 4.4  | 2.8  |
| DPP4       | 0.1  | 0.7  | 0.5  | 10.1 | 7.8  |
| DPPA3      | 0.0  | 0.0  | 0.2  | Inf  | Inf  |
| DPPA4      | 0.8  | 2.1  | 2.0  | 2.6  | 2.5  |
| DPYD-AS1   | 0.5  | 0.1  | 0.2  | 0.2  | 0.5  |
| DRD4       | 0.2  | 0.0  | 0.1  | 0.1  | 0.3  |
| DSCR9      | 0.1  | 0.2  | 0.2  | 3.2  | 4.2  |
| DTX3       | 0.9  | 2.4  | 2.4  | 2.8  | 2.8  |
| DUOX2      | 0.1  | 1.0  | 0.7  | 7.3  | 5.5  |
| DUOXA1     | 0.0  | 0.1  | 0.1  | 4.1  | 5.2  |
| DUSP1      | 36.4 | 10.3 | 9.1  | 0.3  | 0.2  |
| DUSP4      | 0.1  | 0.2  | 0.3  | 2.1  | 3.0  |
| DUSP5P1    | 0.1  | 0.3  | 0.4  | 2.3  | 3.1  |
| DYNC2H1    | 0.1  | 0.6  | 0.6  | 4.8  | 4.5  |
| DYNLRB2    | 0.2  | 0.6  | 1.1  | 3.4  | 6.3  |
| DYNLT3     | 1.8  | 6.3  | 5.8  | 3.5  | 3.2  |

|            |       |      |      |        |        |
|------------|-------|------|------|--------|--------|
| E2F2       | 19.0  | 7.3  | 7.2  | 0.4    | 0.4    |
| ECM2       | 0.0   | 0.1  | 0.1  | 5.4    | 3.2    |
| ECRP       | 0.0   | 0.6  | 0.1  | Inf    | Inf    |
| EEA1       | 1.0   | 4.0  | 3.8  | 4.2    | 4.0    |
| EEF1DP3    | 0.0   | 0.3  | 0.1  | Inf    | Inf    |
| EEF1E1-MUT | 0.0   | 1.0  | 0.0  | 7944.6 | 14.0   |
| EFCAB12    | 1.2   | 4.6  | 4.4  | 3.8    | 3.7    |
| EFCAB5     | 0.0   | 0.1  | 0.3  | 2.6    | 6.9    |
| EFHA2      | 0.1   | 0.6  | 0.6  | 9.4    | 10.1   |
| EFHB       | 0.3   | 0.9  | 1.0  | 3.0    | 3.6    |
| EFHC2      | 0.3   | 1.4  | 1.3  | 4.4    | 4.0    |
| EGF        | 0.1   | 0.4  | 0.4  | 3.0    | 2.7    |
| EGFL6      | 0.0   | 0.1  | 0.1  | 4.2    | 5.8    |
| EGLN3      | 1.1   | 4.1  | 4.3  | 3.8    | 4.0    |
| EGOT       | 0.0   | 0.1  | 0.1  | Inf    | Inf    |
| EHD3       | 1.3   | 5.1  | 5.3  | 3.8    | 4.0    |
| ELANE      | 0.1   | 3.6  | 2.7  | 47.1   | 34.7   |
| EMB        | 0.7   | 5.5  | 4.9  | 8.1    | 7.2    |
| EMP1       | 0.0   | 0.2  | 0.1  | Inf    | Inf    |
| EMR4P      | 0.1   | 0.4  | 0.3  | 2.9    | 2.4    |
| ENPP2      | 0.1   | 0.4  | 0.5  | 5.7    | 6.3    |
| ENPP5      | 0.1   | 0.4  | 0.5  | 3.9    | 4.4    |
| ENTHD1     | 0.6   | 0.3  | 0.2  | 0.4    | 0.3    |
| ENTPD3     | 0.0   | 0.2  | 0.2  | 9.4    | 7.9    |
| EPB42      | 114.1 | 24.5 | 28.9 | 0.2    | 0.3    |
| EPGN       | 0.1   | 0.3  | 0.2  | 6.1    | 3.8    |
| EPS8L2     | 0.3   | 0.7  | 0.9  | 2.2    | 2.9    |
| EPS8L3     | 0.2   | 0.0  | 0.0  | 0.1    | 0.3    |
| EQTN       | 0.1   | 0.0  | 0.0  | #NAME? | #NAME? |
| EREG       | 0.7   | 2.4  | 2.0  | 3.3    | 2.8    |
| ERG        | 0.1   | 0.2  | 0.2  | 2.5    | 2.3    |
| ERMAP      | 70.9  | 31.3 | 30.5 | 0.4    | 0.4    |
| ERMN       | 0.0   | 0.1  | 0.2  | 3.6    | 5.8    |
| ERO1LB     | 0.4   | 0.8  | 0.8  | 2.1    | 2.1    |
| ERRFI1     | 0.3   | 0.0  | 0.1  | 0.1    | 0.5    |
| ERV3-1     | 1.3   | 3.0  | 3.1  | 2.4    | 2.5    |
| ESCO1      | 2.7   | 5.7  | 5.5  | 2.1    | 2.0    |
| ESPNL      | 0.0   | 0.2  | 0.2  | 9.5    | 10.2   |
| ETAA1      | 3.0   | 6.3  | 6.4  | 2.1    | 2.1    |
| ETS1       | 0.3   | 1.7  | 1.6  | 5.6    | 5.2    |
| ETV4       | 0.4   | 2.7  | 3.7  | 6.0    | 8.4    |
| ETV6       | 3.7   | 7.8  | 7.6  | 2.1    | 2.1    |
| EVA1B      | 0.3   | 1.6  | 2.7  | 5.5    | 9.0    |
| EVC        | 0.1   | 0.3  | 0.4  | 5.3    | 6.6    |
| EVI2A      | 0.4   | 1.0  | 1.0  | 2.2    | 2.3    |
| EVI2B      | 1.6   | 4.5  | 3.9  | 2.7    | 2.4    |
| EVPLL      | 0.0   | 0.2  | 0.2  | 10.3   | 11.5   |

|            |      |      |      |        |             |
|------------|------|------|------|--------|-------------|
| EXOC3L2    | 0.9  | 2.0  | 2.1  | 2.3    | 2.4         |
| EXOC3L4    | 0.1  | 0.1  | 0.2  | 2.4    | 3.1         |
| F12        | 0.1  | 0.6  | 0.5  | 6.3    | 5.9         |
| F13A1      | 3.6  | 8.2  | 8.6  | 2.3    | 2.4         |
| F2RL1      | 0.1  | 0.3  | 0.3  | 4.5    | 4.5         |
| F2RL2      | 0.2  | 1.2  | 1.0  | 5.2    | 4.4         |
| FA2H       | 0.2  | 0.0  | 0.0  | #NAME? | 0.1         |
| FABP3      | 0.3  | 1.1  | 0.5  | 4.2    | 2.2         |
| FABP5      | 27.7 | 78.9 | 66.1 | 2.9    | 2.4         |
| FAIM2      | 0.0  | 0.1  | 0.1  | 11.9   | 10.5        |
| FAIM3      | 0.1  | 0.4  | 0.3  | 4.2    | 3.4         |
| FAM101B    | 6.0  | 21.3 | 19.8 | 3.5    | 3.3         |
| FAM107B    | 0.6  | 2.1  | 1.6  | 3.2    | 2.5         |
| FAM108C1   | 0.4  | 1.2  | 1.0  | 2.9    | 2.5         |
| FAM111B    | 0.0  | 0.8  | 0.6  | 41.8   | 30.6        |
| FAM117A    | 80.0 | 24.7 | 27.4 | 0.3    | 0.3         |
| FAM122C    | 7.2  | 3.5  | 3.1  | 0.5    | 0.4         |
| FAM133CP   | 0.0  | 0.1  | 0.1  | 2.8    | 3.1         |
| FAM169A    | 0.1  | 0.2  | 0.2  | 2.8    | 2.2         |
| FAM171A1   | 6.1  | 13.6 | 14.6 | 2.2    | 2.4         |
| FAM174B    | 0.1  | 0.5  | 0.3  | 8.0    | 5.9         |
| FAM183B    | 0.0  | 0.1  | 0.2  | 3.8    | 5.2         |
| FAM196A    | 0.0  | 0.2  | 0.0  | Inf    | Inf         |
| FAM198A    | 0.0  | 0.3  | 0.3  | 9.2    | 7.1         |
| FAM209B    | 0.1  | 0.3  | 0.2  | 2.6    | 2.0         |
| FAM212B    | 1.0  | 2.6  | 2.4  | 2.6    | 2.4         |
| FAM213A    | 1.8  | 5.9  | 5.1  | 3.4    | 2.9         |
| FAM218A    | 0.1  | 0.2  | 0.4  | 2.2    | 5.4         |
| FAM24B-CUZ | 0.0  | 0.0  | 0.3  | 9178.2 | 147365655.5 |
| FAM43A     | 0.1  | 0.3  | 0.3  | 3.6    | 3.0         |
| FAM45A     | 2.3  | 9.6  | 7.3  | 4.1    | 3.1         |
| FAM49A     | 0.7  | 0.3  | 0.3  | 0.4    | 0.5         |
| FAM57B     | 0.7  | 0.3  | 0.2  | 0.4    | 0.3         |
| FAM69B     | 0.8  | 2.0  | 1.9  | 2.4    | 2.2         |
| FAM81B     | 0.2  | 1.2  | 1.2  | 5.1    | 5.2         |
| FAM83A     | 32.0 | 2.3  | 2.2  | 0.1    | 0.1         |
| FAM83F     | 23.9 | 9.7  | 11.9 | 0.4    | 0.5         |
| FAM90A25P  | 0.0  | 0.0  | 0.2  | 2.8    | 14.6        |
| FBLN2      | 0.1  | 0.5  | 0.8  | 7.2    | 12.0        |
| FBN1       | 5.4  | 2.4  | 2.7  | 0.4    | 0.5         |
| FBXO15     | 0.1  | 0.2  | 0.7  | 2.4    | 8.9         |
| FBXO17     | 0.0  | 0.0  | 0.1  | Inf    | Inf         |
| FBXO41     | 0.1  | 0.8  | 0.8  | 9.2    | 8.6         |
| FCER1A     | 4.3  | 20.7 | 14.7 | 4.9    | 3.5         |
| FCER1G     | 3.9  | 10.0 | 9.0  | 2.6    | 2.3         |
| FCGR2A     | 3.3  | 7.3  | 7.3  | 2.2    | 2.2         |
| FCGR2B     | 0.4  | 0.9  | 0.9  | 2.7    | 2.4         |

|          |      |      |      |        |        |
|----------|------|------|------|--------|--------|
| FCGR2C   | 0.1  | 0.6  | 0.6  | 8.3    | 7.5    |
| FCRL2    | 0.0  | 0.1  | 0.1  | Inf    | Inf    |
| FCRLA    | 0.4  | 0.1  | 0.1  | 0.3    | 0.2    |
| FENDRR   | 0.0  | 0.1  | 0.1  | 3.5    | 3.2    |
| FERMT1   | 0.3  | 1.4  | 1.9  | 4.5    | 6.0    |
| FERMT2   | 0.0  | 0.1  | 0.3  | 2.9    | 9.4    |
| FEZ1     | 0.0  | 0.1  | 0.1  | 8.3    | 6.3    |
| FFAR3    | 0.1  | 0.0  | 0.0  | #NAME? | #NAME? |
| FGF11    | 0.2  | 0.5  | 0.5  | 2.8    | 2.7    |
| FGF17    | 0.5  | 3.0  | 2.3  | 6.1    | 4.6    |
| FGF2     | 0.1  | 0.5  | 0.7  | 6.5    | 7.9    |
| FGF5     | 0.1  | 0.3  | 0.5  | 3.4    | 4.6    |
| FGFR1    | 0.1  | 0.6  | 0.4  | 4.9    | 3.5    |
| FGL2     | 0.0  | 0.6  | 0.4  | 12.1   | 8.0    |
| FHDC1    | 16.9 | 7.5  | 7.4  | 0.4    | 0.4    |
| FJX1     | 0.2  | 0.8  | 0.9  | 4.8    | 5.1    |
| FKBP10   | 0.0  | 0.3  | 0.4  | 23.6   | 40.9   |
| FLI1     | 1.4  | 5.2  | 5.4  | 3.8    | 3.9    |
| FLJ12334 | 0.1  | 0.2  | 0.4  | 2.1    | 3.6    |
| FLJ14107 | 0.3  | 0.1  | 0.1  | 0.2    | 0.5    |
| FLJ35390 | 0.5  | 1.2  | 1.8  | 2.4    | 3.4    |
| FLJ37201 | 0.0  | 0.1  | 0.1  | 5.9    | 6.3    |
| FLJ39051 | 0.5  | 1.2  | 1.2  | 2.3    | 2.4    |
| FLJ42351 | 0.0  | 0.3  | 0.1  | Inf    | Inf    |
| FLJ42969 | 0.0  | 0.0  | 0.1  | Inf    | Inf    |
| FLJ45445 | 0.0  | 0.1  | 0.0  | 9.1    | 3.7    |
| FLT3     | 0.0  | 0.2  | 0.1  | 30.7   | 16.8   |
| FLVCR2   | 0.1  | 0.4  | 0.5  | 5.1    | 5.8    |
| FMN1     | 0.0  | 0.1  | 0.1  | 6.8    | 7.7    |
| FMO5     | 0.7  | 1.6  | 1.9  | 2.4    | 2.7    |
| FMOD     | 0.3  | 1.2  | 1.1  | 4.5    | 4.2    |
| FNBP1    | 0.6  | 1.5  | 1.3  | 2.4    | 2.1    |
| FOSB     | 2.2  | 0.6  | 0.5  | 0.3    | 0.2    |
| FOS      | 12.9 | 4.4  | 3.4  | 0.3    | 0.3    |
| FREM1    | 0.0  | 0.1  | 0.1  | 3.2    | 4.1    |
| FRMD3    | 0.0  | 0.1  | 0.1  | 6.2    | 2.7    |
| FRMD4B   | 0.8  | 1.9  | 1.9  | 2.2    | 2.3    |
| FRRS1L   | 1.0  | 0.3  | 0.4  | 0.3    | 0.4    |
| FSCN1    | 14.8 | 30.2 | 32.6 | 2.0    | 2.2    |
| FSTL4    | 0.0  | 0.1  | 0.2  | 6.3    | 12.0   |
| FUT1     | 7.0  | 2.9  | 3.1  | 0.4    | 0.4    |
| FUT8-AS1 | 0.4  | 1.0  | 1.2  | 2.2    | 2.7    |
| FYB      | 0.9  | 5.5  | 4.9  | 5.9    | 5.2    |
| GABBR1   | 1.0  | 2.5  | 2.5  | 2.5    | 2.5    |
| GABRE    | 0.0  | 0.5  | 0.2  | 9.5    | 4.6    |
| GALNT12  | 0.1  | 0.6  | 0.6  | 4.7    | 4.5    |
| GALNT14  | 0.3  | 2.3  | 2.1  | 9.1    | 8.0    |

|           |      |       |       |        |        |
|-----------|------|-------|-------|--------|--------|
| GALNT3    | 0.1  | 0.6   | 0.4   | 8.0    | 5.4    |
| GALR3     | 0.0  | 0.1   | 0.0   | Inf    | Inf    |
| GAMT      | 2.7  | 7.5   | 10.3  | 2.7    | 3.8    |
| GAPT      | 0.1  | 1.5   | 0.9   | 13.4   | 8.1    |
| GAS2      | 0.0  | 0.5   | 0.2   | 16.5   | 5.2    |
| GAS6      | 1.5  | 3.2   | 3.2   | 2.1    | 2.2    |
| GATA5     | 1.8  | 0.7   | 0.4   | 0.4    | 0.2    |
| GATS      | 1.7  | 4.5   | 4.5   | 2.6    | 2.6    |
| GBP3      | 0.3  | 1.1   | 1.4   | 4.4    | 5.4    |
| GBP4      | 1.3  | 5.0   | 4.6   | 4.0    | 3.7    |
| GBP5      | 0.7  | 3.1   | 2.9   | 4.2    | 3.9    |
| GCC2      | 2.4  | 8.9   | 8.4   | 3.6    | 3.4    |
| GCNT4     | 0.1  | 0.3   | 0.3   | 2.7    | 2.6    |
| GDF15     | 81.0 | 24.9  | 29.2  | 0.3    | 0.4    |
| GDPD5     | 15.2 | 5.6   | 6.6   | 0.4    | 0.4    |
| GEM       | 3.9  | 1.5   | 1.7   | 0.4    | 0.4    |
| GFAP      | 0.0  | 0.0   | 0.1   | 2.8    | 10.5   |
| GIMAP2    | 2.0  | 5.3   | 5.1   | 2.7    | 2.5    |
| GIMAP6    | 0.1  | 1.4   | 1.3   | 10.4   | 10.0   |
| GIMAP7    | 0.0  | 0.2   | 0.1   | Inf    | Inf    |
| GIPC3     | 0.1  | 0.3   | 0.4   | 2.2    | 3.0    |
| GJA1      | 0.0  | 0.5   | 0.5   | 9.3    | 9.5    |
| GJB5      | 0.0  | 0.0   | 0.1   | Inf    | Inf    |
| GKN2      | 0.2  | 0.0   | 0.0   | 0.1    | #NAME? |
| GLB1L2    | 0.2  | 1.0   | 1.0   | 4.3    | 4.2    |
| GLOD5     | 0.1  | 0.3   | 0.6   | 2.6    | 6.0    |
| GLT25D2   | 0.1  | 0.2   | 0.1   | 3.6    | 2.2    |
| GLT8D2    | 0.1  | 0.2   | 0.1   | 3.1    | 2.1    |
| GMFG      | 55.5 | 159.8 | 160.9 | 2.9    | 2.9    |
| GNAT2     | 0.0  | 0.3   | 0.2   | 6.1    | 3.6    |
| GNB5      | 1.2  | 3.1   | 2.8   | 2.6    | 2.4    |
| GNG11     | 3.4  | 8.2   | 7.4   | 2.4    | 2.2    |
| GNG8      | 0.0  | 1.9   | 3.6   | Inf    | Inf    |
| GPLY      | 0.2  | 2.5   | 1.7   | 12.5   | 8.6    |
| GNRH2     | 0.1  | 0.0   | 0.0   | #NAME? | #NAME? |
| GNRHR     | 0.0  | 0.2   | 0.1   | 5.3    | 4.0    |
| GOLGA4    | 4.8  | 11.2  | 9.8   | 2.3    | 2.0    |
| GOLGA6L7P | 0.0  | 0.2   | 0.5   | Inf    | Inf    |
| GOLGA8B   | 6.0  | 16.6  | 13.6  | 2.8    | 2.3    |
| GOLGB1    | 2.8  | 9.3   | 9.7   | 3.3    | 3.5    |
| GP1BB     | 7.1  | 15.0  | 17.1  | 2.1    | 2.4    |
| GPC2      | 0.1  | 0.3   | 0.3   | 2.3    | 2.6    |
| GPM6B     | 0.2  | 0.9   | 0.8   | 3.9    | 3.4    |
| GPNMB     | 1.6  | 3.9   | 4.6   | 2.4    | 2.9    |
| GPR113    | 0.1  | 0.3   | 0.3   | 3.4    | 4.0    |
| GPR114    | 0.0  | 0.0   | 0.1   | 2.1    | 6.8    |
| GPR126    | 0.0  | 0.1   | 0.1   | 2.5    | 3.6    |



|           |       |      |      |      |      |
|-----------|-------|------|------|------|------|
| GPR132    | 0.1   | 0.3  | 0.3  | 5.4  | 4.5  |
| GPR137C   | 0.0   | 0.2  | 0.1  | 10.2 | 3.5  |
| GPR141    | 0.0   | 0.2  | 0.0  | Inf  | Inf  |
| GPR157    | 0.1   | 0.3  | 0.1  | 5.1  | 2.1  |
| GPR161    | 0.4   | 1.0  | 1.1  | 2.6  | 2.9  |
| GPR162    | 0.0   | 0.1  | 0.1  | 8.4  | 7.4  |
| GPR173    | 0.0   | 0.4  | 0.4  | 9.1  | 7.8  |
| GPR21     | 0.0   | 0.1  | 0.0  | Inf  | Inf  |
| GPR27     | 0.2   | 0.1  | 0.1  | 0.3  | 0.3  |
| GPR35     | 0.0   | 0.2  | 0.4  | 8.3  | 18.4 |
| GPR3      | 0.1   | 0.7  | 0.9  | 5.1  | 6.5  |
| GPR55     | 0.0   | 0.1  | 0.1  | 3.3  | 5.6  |
| GPR63     | 0.2   | 0.5  | 0.6  | 3.2  | 3.8  |
| GPR65     | 0.4   | 1.4  | 1.1  | 4.0  | 3.1  |
| GPR85     | 0.1   | 0.2  | 0.3  | 3.4  | 4.6  |
| GPRASP1   | 0.1   | 0.2  | 0.2  | 2.6  | 3.3  |
| GPRASP2   | 0.1   | 0.0  | 0.0  | 0.0  | 0.0  |
| GPSM1     | 0.4   | 2.7  | 3.4  | 7.1  | 9.0  |
| GPSM3     | 13.0  | 29.5 | 31.9 | 2.3  | 2.5  |
| GPX7      | 1.0   | 3.3  | 3.0  | 3.3  | 3.0  |
| GRAMD1B   | 0.0   | 0.2  | 0.2  | 8.3  | 9.4  |
| GRAMD3    | 1.0   | 2.6  | 2.3  | 2.5  | 2.2  |
| GRAP      | 0.0   | 0.3  | 0.6  | 10.3 | 18.3 |
| GRASP     | 0.1   | 0.3  | 0.6  | 2.1  | 4.2  |
| GRIK4     | 0.0   | 0.1  | 0.4  | 4.4  | 13.3 |
| GRIK5     | 0.2   | 2.7  | 2.7  | 11.8 | 11.6 |
| GRIN2D    | 0.1   | 0.3  | 0.3  | 5.5  | 6.3  |
| GRK5      | 0.8   | 2.4  | 2.2  | 2.8  | 2.7  |
| GRM4      | 0.0   | 0.1  | 0.2  | 3.1  | 4.7  |
| GSTP1     | 25.1  | 66.5 | 64.1 | 2.7  | 2.6  |
| GTF2IP1   | 0.1   | 0.5  | 0.4  | 4.1  | 3.7  |
| GTF2IP1   | 0.1   | 0.2  | 0.2  | 2.6  | 2.8  |
| GTF2IRD2B | 0.1   | 0.4  | 0.5  | 3.0  | 4.3  |
| GTF2IRD2  | 0.0   | 0.2  | 0.2  | 12.2 | 13.7 |
| GUCY1A3   | 0.5   | 1.9  | 2.2  | 3.8  | 4.5  |
| GUCY1B3   | 1.8   | 5.5  | 5.7  | 3.0  | 3.1  |
| GVINP1    | 0.1   | 0.3  | 0.2  | 4.0  | 3.3  |
| GYG2      | 0.1   | 0.2  | 0.2  | 3.0  | 2.6  |
| GYG2P1    | 1.5   | 0.7  | 0.5  | 0.5  | 0.4  |
| GYPA      | 87.7  | 28.5 | 26.5 | 0.3  | 0.3  |
| GYPB      | 126.8 | 29.1 | 31.1 | 0.2  | 0.2  |
| GYPE      | 70.7  | 21.1 | 23.1 | 0.3  | 0.3  |
| H1F0      | 195.9 | 39.9 | 42.1 | 0.2  | 0.2  |
| H2AFY2    | 2.0   | 0.8  | 0.8  | 0.4  | 0.4  |
| H3F3C     | 0.0   | 0.0  | 0.1  | Inf  | Inf  |
| HAGH      | 67.0  | 30.3 | 31.0 | 0.5  | 0.5  |
| HAL       | 0.1   | 0.4  | 0.4  | 3.8  | 3.2  |

|           |        |       |       |        |        |
|-----------|--------|-------|-------|--------|--------|
| HAVCR1P1  | 0.0    | 0.2   | 0.2   | 6.1    | 8.3    |
| HBA2      | 1045.7 | 325.7 | 372.3 | 0.3    | 0.4    |
| HBE1      | 9.9    | 96.0  | 104.2 | 9.7    | 10.5   |
| HBM       | 59.1   | 3.6   | 3.5   | 0.1    | 0.1    |
| HBZ       | 3.0    | 0.9   | 1.1   | 0.3    | 0.4    |
| HCG4B     | 0.0    | 0.1   | 0.0   | Inf    | Inf    |
| HCP5      | 0.0    | 0.1   | 0.1   | 3.1    | 5.2    |
| HCST      | 3.1    | 13.5  | 14.2  | 4.3    | 4.5    |
| HDC       | 11.4   | 31.2  | 27.1  | 2.7    | 2.4    |
| HDX       | 0.0    | 0.2   | 0.2   | 3.2    | 3.9    |
| HEG1      | 0.1    | 0.1   | 0.2   | 2.4    | 2.7    |
| HEMGN     | 104.8  | 44.4  | 40.8  | 0.4    | 0.4    |
| HEPHL1    | 0.0    | 0.0   | 0.1   | 4.2    | 10.6   |
| HES6      | 174.3  | 66.0  | 74.5  | 0.4    | 0.4    |
| HEY1      | 0.7    | 1.8   | 1.8   | 2.8    | 2.8    |
| HEY2      | 0.0    | 0.1   | 0.1   | 6.2    | 11.5   |
| HGD       | 0.6    | 1.7   | 1.7   | 2.9    | 2.9    |
| HGF       | 0.0    | 0.2   | 0.2   | 6.8    | 5.8    |
| HHEX      | 13.4   | 29.4  | 27.5  | 2.2    | 2.1    |
| HIPK2     | 2.3    | 5.0   | 5.9   | 2.2    | 2.6    |
| HIST1H1T  | 0.2    | 0.0   | 0.0   | #NAME? | #NAME? |
| HIST1H2BK | 16.0   | 37.0  | 36.6  | 2.3    | 2.3    |
| HIST1H2BL | 2.1    | 0.6   | 0.5   | 0.3    | 0.2    |
| HIST1H2BM | 1.6    | 0.8   | 0.7   | 0.5    | 0.4    |
| HIST1H3A  | 2.4    | 0.3   | 1.1   | 0.1    | 0.5    |
| HIST1H4D  | 2.6    | 0.7   | 1.0   | 0.3    | 0.4    |
| HIST1H4L  | 0.9    | 0.0   | 0.1   | #NAME? | 0.2    |
| HIST2H2BC | 7.6    | 3.1   | 2.7   | 0.4    | 0.4    |
| HIST2H2BF | 0.0    | 0.2   | 0.2   | Inf    | Inf    |
| HIST3H2A  | 16.1   | 7.5   | 7.0   | 0.5    | 0.4    |
| HIST3H2BB | 1.6    | 0.3   | 0.7   | 0.2    | 0.4    |
| HLA-B     | 22.5   | 67.5  | 71.9  | 3.0    | 3.2    |
| HLA-DMA   | 7.4    | 25.5  | 19.6  | 3.4    | 2.6    |
| HLA-DMB   | 0.0    | 0.2   | 0.3   | 7.5    | 14.5   |
| HLA-DOB   | 0.3    | 0.6   | 0.8   | 2.4    | 3.2    |
| HLA-DPA1  | 2.1    | 17.3  | 14.8  | 8.3    | 7.1    |
| HLA-DPB1  | 1.2    | 8.3   | 9.9   | 7.2    | 8.5    |
| HLA-DQB1  | 0.0    | 0.2   | 0.1   | 12.3   | 6.2    |
| HLA-DRA   | 1.5    | 43.8  | 42.0  | 29.0   | 27.9   |
| HLA-DRB1  | 1.7    | 32.8  | 29.4  | 19.6   | 17.6   |
| HLA-DRB5  | 0.4    | 6.4   | 5.7   | 14.8   | 13.1   |
| HLA-DRB6  | 0.1    | 1.8   | 2.2   | 16.6   | 19.9   |
| HLA-F     | 0.4    | 1.7   | 0.9   | 4.0    | 2.2    |
| HM13-AS1  | 0.2    | 0.9   | 0.4   | 4.7    | 2.4    |
| HMCN1     | 0.0    | 0.1   | 0.1   | 2.4    | 4.1    |
| HMGB3P1   | 0.2    | 0.1   | 0.1   | 0.4    | 0.4    |
| HMGCR     | 25.4   | 57.0  | 51.9  | 2.2    | 2.0    |

|            |       |       |       |                         |        |
|------------|-------|-------|-------|-------------------------|--------|
| HMGCS1     | 100.1 | 348.3 | 307.1 | 3.5                     | 3.1    |
| HMOX1      | 5.1   | 11.4  | 10.4  | 2.2                     | 2.0    |
| HNF4A      | 0.2   | 0.0   | 0.0   | 0.2                     | #NAME? |
| HNRNPA1P3  | 0.0   | 0.2   | 0.1   | Inf                     | Inf    |
| HOTAIRM1   | 0.8   | 1.7   | 2.5   | 2.0                     | 3.1    |
| HOXA10     | 1.0   | 4.4   | 3.6   | 4.4                     | 3.6    |
| HOXA10-HO) | 0.0   | 0.1   | 0.0   | ##### 169011347631110.0 |        |
| HOXA1      | 0.1   | 0.2   | 0.3   | 2.5                     | 3.7    |
| HOXA5      | 0.0   | 0.1   | 0.1   | Inf                     | Inf    |
| HOXA7      | 0.0   | 0.5   | 0.4   | 14.8                    | 12.0   |
| HOXA9      | 0.6   | 3.2   | 2.5   | 5.3                     | 4.0    |
| HOXA-AS4   | 0.0   | 0.2   | 0.2   | Inf                     | Inf    |
| HOXB9      | 0.1   | 0.0   | 0.0   | #NAME?                  | #NAME? |
| HPN        | 0.1   | 0.2   | 0.2   | 2.9                     | 3.8    |
| HPSE       | 1.7   | 5.2   | 5.1   | 3.1                     | 3.0    |
| HRASLS     | 0.1   | 0.4   | 0.3   | 3.8                     | 3.1    |
| HRH2       | 0.0   | 0.3   | 0.2   | 24.9                    | 12.6   |
| HR         | 0.2   | 0.5   | 0.7   | 2.6                     | 3.6    |
| HSD17B14   | 0.7   | 1.7   | 1.6   | 2.4                     | 2.3    |
| HSD17B7    | 3.6   | 10.3  | 8.8   | 2.8                     | 2.4    |
| HSD17B7P2  | 0.7   | 2.1   | 1.9   | 3.1                     | 2.8    |
| HSH2D      | 2.0   | 7.1   | 5.6   | 3.5                     | 2.8    |
| HSPA1B     | 15.9  | 7.1   | 6.7   | 0.4                     | 0.4    |
| HSPA7      | 0.4   | 1.2   | 0.8   | 3.3                     | 2.3    |
| HSPE1-MOB4 | 0.0   | 0.1   | 0.1   | #####                   | #####  |
| HTR2A      | 0.0   | 0.2   | 0.1   | 4.5                     | 2.4    |
| HTR3C      | 0.0   | 0.1   | 0.1   | 3.4                     | 6.2    |
| HTRA1      | 0.0   | 0.1   | 0.1   | Inf                     | Inf    |
| HTRA3      | 0.0   | 1.0   | 1.8   | 42.3                    | 76.0   |
| HVCN1      | 0.2   | 0.6   | 0.8   | 3.3                     | 4.0    |
| IAPP       | 0.0   | 0.1   | 0.1   | 2.8                     | 2.8    |
| ICAM4      | 45.6  | 21.5  | 22.3  | 0.5                     | 0.5    |
| IFI16      | 0.8   | 5.4   | 4.5   | 6.4                     | 5.4    |
| IFI27L2    | 18.6  | 43.6  | 54.7  | 2.3                     | 2.9    |
| IFI44      | 4.0   | 9.3   | 8.4   | 2.3                     | 2.1    |
| IFITM1     | 16.1  | 55.1  | 66.3  | 3.4                     | 4.1    |
| IFITM2     | 54.2  | 124.9 | 133.4 | 2.3                     | 2.5    |
| IFITM3     | 5.9   | 21.8  | 16.8  | 3.7                     | 2.8    |
| IGF2BP3    | 0.1   | 0.6   | 0.6   | 4.2                     | 4.4    |
| IGFBP2     | 8.9   | 25.1  | 26.8  | 2.8                     | 3.0    |
| IGFBP4     | 2.8   | 11.1  | 14.1  | 3.9                     | 5.0    |
| IGFBP7     | 4.9   | 13.5  | 12.4  | 2.8                     | 2.5    |
| IGFL2      | 11.3  | 2.9   | 2.4   | 0.3                     | 0.2    |
| IGLL1      | 3.1   | 10.2  | 10.3  | 3.3                     | 3.4    |
| IGLL3P     | 0.6   | 0.2   | 0.1   | 0.3                     | 0.1    |
| IGSF10     | 0.1   | 1.2   | 0.5   | 8.4                     | 3.8    |
| IGSF1      | 0.0   | 0.1   | 0.0   | Inf                     | Inf    |

|            |      |      |      |         |      |
|------------|------|------|------|---------|------|
| IGSF9B     | 0.1  | 0.2  | 0.2  | 3.8     | 3.5  |
| IKZF2      | 0.2  | 0.6  | 0.5  | 3.1     | 3.0  |
| IL10       | 0.1  | 0.2  | 0.1  | 3.2     | 2.4  |
| IL12A      | 0.0  | 0.1  | 0.1  | 2.4     | 2.1  |
| IL15RA     | 16.5 | 7.9  | 7.4  | 0.5     | 0.5  |
| IL17D      | 0.0  | 0.2  | 0.3  | Inf     | Inf  |
| IL1B       | 0.5  | 5.2  | 5.7  | 9.5     | 10.5 |
| IL21R-AS1  | 0.1  | 0.6  | 0.7  | 4.9     | 5.6  |
| IL21R      | 0.1  | 0.7  | 0.7  | 11.3    | 11.0 |
| IL24       | 0.0  | 0.3  | 0.1  | 15.5    | 5.0  |
| IL2RG      | 22.1 | 49.6 | 50.7 | 2.2     | 2.3  |
| IL32       | 0.0  | 0.1  | 0.1  | Inf     | Inf  |
| IL4        | 0.1  | 0.1  | 0.1  | 2.1     | 2.2  |
| IL5RA      | 0.0  | 0.1  | 0.1  | 13.2    | 23.2 |
| IL6ST      | 2.9  | 6.4  | 6.1  | 2.2     | 2.1  |
| IL7R       | 1.3  | 5.1  | 5.3  | 3.9     | 4.1  |
| IMPA1      | 3.7  | 7.8  | 7.7  | 2.1     | 2.1  |
| IMPG2      | 0.1  | 0.2  | 0.1  | 2.5     | 2.2  |
| INHA       | 0.3  | 0.6  | 1.2  | 2.2     | 4.1  |
| INO80B-WBF | 0.0  | 4.9  | 0.0  | 34106.1 | 2.7  |
| INPP1      | 3.0  | 7.3  | 6.2  | 2.4     | 2.0  |
| INPP4B     | 0.3  | 1.1  | 0.9  | 3.2     | 2.7  |
| IQSEC2     | 0.7  | 1.5  | 2.5  | 2.1     | 3.4  |
| IRAK3      | 2.7  | 7.0  | 6.3  | 2.6     | 2.3  |
| IRF5       | 0.2  | 1.0  | 1.1  | 4.1     | 4.4  |
| IRX3       | 0.0  | 0.2  | 0.1  | 13.1    | 7.3  |
| ISCA2      | 35.5 | 12.3 | 13.2 | 0.3     | 0.4  |
| ISM1       | 0.0  | 0.1  | 0.3  | 3.5     | 14.2 |
| ITGA10     | 0.0  | 0.1  | 0.1  | 2.0     | 2.4  |
| ITGA2B     | 25.8 | 76.3 | 83.3 | 3.0     | 3.2  |
| ITGA2      | 0.1  | 0.5  | 0.3  | 4.7     | 2.7  |
| ITGA6      | 1.4  | 3.7  | 2.9  | 2.7     | 2.1  |
| ITGA8      | 0.0  | 0.1  | 0.2  | 5.2     | 8.9  |
| ITGAL      | 0.2  | 1.1  | 1.2  | 5.0     | 5.7  |
| ITGAM      | 0.5  | 1.3  | 1.1  | 2.7     | 2.4  |
| ITGAX      | 0.8  | 2.0  | 2.0  | 2.3     | 2.4  |
| ITGB2-AS1  | 0.1  | 0.4  | 0.2  | 4.3     | 2.2  |
| ITGB2      | 2.0  | 5.2  | 5.6  | 2.6     | 2.9  |
| ITGB5      | 1.0  | 2.0  | 2.2  | 2.0     | 2.2  |
| ITGB7      | 1.8  | 3.8  | 3.8  | 2.2     | 2.2  |
| ITGBL1     | 0.2  | 0.0  | 0.1  | 0.1     | 0.4  |
| ITPR1      | 2.1  | 4.9  | 5.0  | 2.3     | 2.4  |
| JAG2       | 0.0  | 0.1  | 0.2  | 5.2     | 7.5  |
| JAK3       | 0.2  | 0.5  | 0.4  | 2.9     | 2.4  |
| JAKMIP1    | 0.1  | 0.5  | 0.6  | 6.2     | 6.7  |
| JAKMIP2    | 0.1  | 2.1  | 1.9  | 35.2    | 30.9 |
| JDP2       | 0.4  | 0.2  | 0.2  | 0.5     | 0.5  |

|             |      |      |      |      |      |
|-------------|------|------|------|------|------|
| JHDM1D      | 3.5  | 1.6  | 1.8  | 0.4  | 0.5  |
| JMJD1C      | 3.8  | 7.9  | 7.9  | 2.1  | 2.1  |
| JMJD7-PLA2C | 0.4  | 1.5  | 3.0  | 3.9  | 7.7  |
| JPH1        | 0.2  | 0.6  | 0.4  | 3.8  | 2.4  |
| JPH4        | 0.0  | 0.2  | 0.1  | 12.6 | 6.3  |
| JUNB        | 63.8 | 21.4 | 21.6 | 0.3  | 0.3  |
| JUN         | 6.0  | 2.7  | 1.0  | 0.4  | 0.2  |
| KALRN       | 0.2  | 0.8  | 0.9  | 3.2  | 3.7  |
| KAZN        | 0.5  | 1.1  | 1.3  | 2.2  | 2.6  |
| KBTBD11     | 0.0  | 0.3  | 0.2  | 15.9 | 11.4 |
| KCNAB2      | 8.6  | 18.2 | 21.3 | 2.1  | 2.5  |
| KCNC3       | 0.0  | 0.1  | 0.1  | 3.1  | 7.4  |
| KCNE4       | 0.0  | 0.1  | 0.1  | 2.8  | 6.8  |
| KCNIP2      | 0.8  | 2.8  | 2.0  | 3.4  | 2.5  |
| KCNIP4      | 0.4  | 0.8  | 0.8  | 2.0  | 2.1  |
| KCNJ12      | 0.0  | 0.1  | 0.1  | Inf  | Inf  |
| KCNJ18      | 0.0  | 0.1  | 0.1  | Inf  | Inf  |
| KCNQ10T1    | 0.5  | 1.0  | 1.1  | 2.1  | 2.3  |
| KCNQ5       | 0.4  | 1.8  | 1.4  | 5.1  | 3.9  |
| KCNT2       | 0.0  | 0.0  | 0.1  | Inf  | Inf  |
| KCTD12      | 0.1  | 0.3  | 0.3  | 3.1  | 2.3  |
| KCTD17      | 1.3  | 4.1  | 4.8  | 3.2  | 3.7  |
| KHDRBS3     | 0.1  | 0.3  | 0.1  | 4.5  | 2.1  |
| KIAA0125    | 2.4  | 8.8  | 9.0  | 3.7  | 3.8  |
| KIAA1009    | 1.5  | 3.5  | 3.0  | 2.3  | 2.0  |
| KIAA1033    | 3.9  | 11.1 | 10.2 | 2.8  | 2.6  |
| KIAA1107    | 0.2  | 0.5  | 0.8  | 2.7  | 4.5  |
| KIAA1161    | 0.0  | 0.1  | 0.2  | 2.6  | 10.2 |
| KIAA1377    | 0.2  | 1.2  | 1.3  | 5.9  | 6.4  |
| KIAA1598    | 0.9  | 2.6  | 2.6  | 3.0  | 3.0  |
| KIF14       | 3.9  | 8.3  | 7.8  | 2.1  | 2.0  |
| KIF20B      | 7.5  | 16.6 | 15.3 | 2.2  | 2.1  |
| KIF21B      | 0.2  | 0.7  | 0.9  | 4.6  | 6.1  |
| KIF3C       | 1.1  | 3.4  | 3.9  | 3.2  | 3.6  |
| KIFC3       | 5.9  | 13.0 | 13.4 | 2.2  | 2.3  |
| KLB         | 0.1  | 0.1  | 0.1  | 2.4  | 2.6  |
| KLC3        | 0.1  | 0.2  | 0.2  | 2.6  | 2.1  |
| KLF12       | 0.0  | 0.1  | 0.2  | 6.9  | 9.7  |
| KLF13       | 55.0 | 26.5 | 27.0 | 0.5  | 0.5  |
| KLF15       | 1.5  | 0.3  | 0.2  | 0.2  | 0.1  |
| KLF8        | 0.1  | 0.3  | 0.5  | 4.9  | 7.1  |
| KLHDC7B     | 0.0  | 0.1  | 0.1  | 5.6  | 10.5 |
| KLHL13      | 0.3  | 0.7  | 1.0  | 2.7  | 3.6  |
| KLHL17      | 1.5  | 0.7  | 0.8  | 0.5  | 0.5  |
| KLHL31      | 0.0  | 0.2  | 0.2  | 6.6  | 6.1  |
| KLHL35      | 0.4  | 0.8  | 0.9  | 2.1  | 2.5  |
| KLHL5       | 0.8  | 2.4  | 2.5  | 3.1  | 3.3  |

|           |      |      |      |        |      |
|-----------|------|------|------|--------|------|
| KLK1      | 0.4  | 1.0  | 0.9  | 2.6    | 2.4  |
| KPNA5     | 0.8  | 2.5  | 3.1  | 3.0    | 3.7  |
| KRBA1     | 0.5  | 1.1  | 1.5  | 2.5    | 3.3  |
| KREMEN1   | 24.2 | 7.3  | 7.4  | 0.3    | 0.3  |
| KREMEN2   | 0.3  | 0.1  | 0.1  | 0.4    | 0.4  |
| KRT13     | 16.1 | 7.3  | 6.5  | 0.5    | 0.4  |
| KRT19     | 9.2  | 2.4  | 2.4  | 0.3    | 0.3  |
| KRT74     | 0.0  | 0.1  | 0.2  | 2.9    | 3.4  |
| KRT77     | 0.0  | 0.1  | 0.1  | 2.8    | 2.6  |
| KRT79     | 0.6  | 5.3  | 6.1  | 8.5    | 9.8  |
| KRT81     | 0.0  | 0.1  | 0.2  | 8.3    | 9.4  |
| KTN1      | 19.7 | 44.4 | 40.0 | 2.3    | 2.0  |
| LACC1     | 0.4  | 1.0  | 1.1  | 2.4    | 2.6  |
| LAIR1     | 0.6  | 2.8  | 2.1  | 4.7    | 3.5  |
| LAIR2     | 0.6  | 2.4  | 3.1  | 4.0    | 5.3  |
| LAMB2     | 0.2  | 0.7  | 0.5  | 4.6    | 3.4  |
| LAMB2P1   | 0.4  | 0.1  | 0.0  | 0.2    | 0.1  |
| LAMP3     | 1.1  | 0.4  | 0.5  | 0.3    | 0.5  |
| LAPTM4B   | 12.8 | 52.6 | 46.6 | 4.1    | 3.6  |
| LAT2      | 3.2  | 7.1  | 6.4  | 2.2    | 2.0  |
| LCA5      | 1.7  | 4.3  | 3.7  | 2.5    | 2.1  |
| LCN15     | 0.1  | 0.0  | 0.0  | 0.2    | 0.3  |
| LCN2      | 2.9  | 8.4  | 10.2 | 2.9    | 3.5  |
| LCP2      | 16.5 | 48.0 | 47.3 | 2.9    | 2.9  |
| LDB3      | 0.1  | 0.0  | 0.0  | 0.2    | 0.1  |
| LDLRAD2   | 0.1  | 0.1  | 0.1  | 2.1    | 2.1  |
| LDOC1     | 0.0  | 0.6  | 0.5  | 23.2   | 20.7 |
| LEF1-AS1  | 0.3  | 1.8  | 1.2  | 5.1    | 3.5  |
| LEF1      | 1.9  | 6.3  | 5.6  | 3.3    | 2.9  |
| LEFTY1    | 0.0  | 0.1  | 0.1  | 3.1    | 2.6  |
| LFNG      | 0.4  | 1.4  | 1.7  | 3.7    | 4.6  |
| LGALS1    | 2.1  | 7.5  | 5.7  | 3.5    | 2.7  |
| LGMN      | 0.4  | 1.1  | 0.9  | 2.7    | 2.1  |
| LGR4      | 2.6  | 0.7  | 0.9  | 0.3    | 0.3  |
| LGR6      | 0.7  | 2.8  | 2.8  | 3.8    | 3.8  |
| LHX6      | 0.0  | 0.1  | 0.2  | 3.8    | 5.4  |
| LIF       | 1.8  | 5.8  | 5.8  | 3.2    | 3.2  |
| LIG4      | 2.6  | 5.6  | 5.4  | 2.1    | 2.1  |
| LIMD2     | 3.5  | 11.9 | 11.9 | 3.4    | 3.4  |
| LIN7A     | 0.0  | 0.2  | 0.4  | Inf    | Inf  |
| LINC00028 | 0.2  | 0.0  | 0.1  | #NAME? | 0.3  |
| LINC00035 | 0.1  | 0.4  | 0.6  | 4.3    | 5.8  |
| LINC00085 | 0.2  | 1.1  | 0.7  | 5.6    | 3.6  |
| LINC00092 | 0.2  | 0.7  | 0.5  | 3.2    | 2.3  |
| LINC00173 | 0.9  | 2.6  | 3.1  | 3.0    | 3.6  |
| LINC00441 | 0.1  | 0.2  | 0.3  | 2.5    | 3.1  |
| LINC00520 | 0.2  | 1.0  | 0.7  | 6.0    | 4.0  |

|            |     |     |     |        |        |
|------------|-----|-----|-----|--------|--------|
| LINC00570  | 0.6 | 0.3 | 0.1 | 0.5    | 0.1    |
| LINC00571  | 0.2 | 0.4 | 0.4 | 2.2    | 2.4    |
| LINC00654  | 0.1 | 0.4 | 0.3 | 3.9    | 2.8    |
| LINC00656  | 0.1 | 0.0 | 0.0 | #NAME? | 0.2    |
| LINC00670  | 0.0 | 0.1 | 0.0 | Inf    | Inf    |
| LIPC       | 0.0 | 0.1 | 0.2 | Inf    | Inf    |
| LIPH       | 0.1 | 0.5 | 0.6 | 4.8    | 5.8    |
| LMO1       | 0.0 | 0.1 | 0.1 | 3.4    | 4.1    |
| LNx1       | 0.3 | 1.1 | 1.0 | 3.3    | 3.0    |
| LOC1001278 | 0.2 | 0.4 | 0.5 | 2.7    | 2.8    |
| LOC1001282 | 2.3 | 5.3 | 5.7 | 2.4    | 2.5    |
| LOC1001290 | 1.9 | 0.5 | 0.5 | 0.2    | 0.2    |
| LOC1001300 | 0.1 | 0.2 | 0.3 | 2.3    | 2.9    |
| LOC1001302 | 0.0 | 0.3 | 0.4 | 9.3    | 11.1   |
| LOC1001302 | 0.0 | 0.4 | 0.3 | Inf    | Inf    |
| LOC1001309 | 0.2 | 0.5 | 0.6 | 2.2    | 2.6    |
| LOC1001317 | 0.9 | 0.1 | 0.0 | 0.1    | 0.0    |
| LOC1001327 | 0.0 | 0.1 | 0.1 | Inf    | Inf    |
| LOC1002707 | 0.1 | 0.4 | 0.4 | 3.3    | 3.4    |
| LOC1002717 | 0.1 | 0.4 | 0.4 | 6.2    | 6.9    |
| LOC1002722 | 0.6 | 1.2 | 1.3 | 2.1    | 2.3    |
| LOC1002871 | 0.6 | 1.8 | 2.1 | 3.0    | 3.6    |
| LOC1002873 | 0.7 | 1.9 | 1.5 | 2.8    | 2.2    |
| LOC1002884 | 0.2 | 0.5 | 0.9 | 2.8    | 4.3    |
| LOC1002889 | 0.2 | 0.0 | 0.1 | 0.2    | 0.3    |
| LOC1003026 | 0.3 | 0.0 | 0.0 | #NAME? | #NAME? |
| LOC1004991 | 0.0 | 0.1 | 0.1 | 2.0    | 4.1    |
| LOC1004992 | 0.3 | 1.0 | 0.6 | 3.2    | 2.2    |
| LOC1005056 | 0.3 | 0.1 | 0.1 | 0.4    | 0.3    |
| LOC1005057 | 0.2 | 0.5 | 0.5 | 3.1    | 3.1    |
| LOC1005058 | 0.0 | 0.1 | 1.0 | 2.0    | 26.5   |
| LOC1005061 | 0.2 | 1.4 | 0.7 | 7.8    | 3.6    |
| LOC1005061 | 0.6 | 1.5 | 1.7 | 2.5    | 2.7    |
| LOC1005061 | 0.0 | 0.4 | 0.2 | Inf    | Inf    |
| LOC1005061 | 0.0 | 0.1 | 0.1 | 2.7    | 5.2    |
| LOC1005062 | 0.1 | 0.0 | 0.0 | 0.1    | #NAME? |
| LOC1005062 | 0.1 | 0.0 | 0.0 | #NAME? | #NAME? |
| LOC1005063 | 0.0 | 0.1 | 0.3 | 4.4    | 9.9    |
| LOC1005067 | 0.4 | 0.9 | 0.8 | 2.3    | 2.2    |
| LOC1005072 | 0.0 | 0.1 | 0.1 | 3.4    | 3.1    |
| LOC1005073 | 0.1 | 0.6 | 0.7 | 5.5    | 6.3    |
| LOC1005073 | 0.1 | 0.0 | 0.0 | 0.3    | 0.2    |
| LOC1005074 | 0.0 | 0.2 | 0.2 | 4.0    | 3.4    |
| LOC1005074 | 0.6 | 2.4 | 2.5 | 4.3    | 4.5    |
| LOC1006309 | 0.8 | 2.2 | 2.6 | 2.8    | 3.4    |
| LOC143666  | 0.2 | 0.5 | 0.5 | 2.4    | 2.2    |
| LOC151009  | 0.1 | 0.4 | 0.5 | 7.2    | 8.1    |

|           |     |     |     |        |        |
|-----------|-----|-----|-----|--------|--------|
| LOC154761 | 0.1 | 0.3 | 0.3 | 2.9    | 2.3    |
| LOC283174 | 0.1 | 0.4 | 0.3 | 4.3    | 3.1    |
| LOC283440 | 0.0 | 0.3 | 0.1 | Inf    | Inf    |
| LOC283692 | 0.3 | 0.7 | 0.6 | 2.2    | 2.0    |
| LOC283710 | 0.0 | 0.1 | 0.1 | 4.0    | 2.1    |
| LOC284276 | 0.1 | 0.1 | 0.1 | 2.2    | 2.1    |
| LOC284889 | 0.0 | 0.3 | 0.2 | 6.7    | 4.5    |
| LOC285540 | 0.3 | 1.1 | 0.9 | 3.4    | 3.1    |
| LOC285758 | 0.0 | 0.0 | 0.1 | 3.5    | 11.5   |
| LOC286190 | 0.0 | 0.0 | 0.1 | 2.1    | 6.3    |
| LOC286367 | 0.5 | 1.2 | 1.4 | 2.2    | 2.6    |
| LOC339166 | 0.0 | 0.1 | 0.1 | Inf    | Inf    |
| LOC344595 | 1.3 | 2.7 | 3.0 | 2.0    | 2.2    |
| LOC344887 | 0.3 | 2.0 | 2.8 | 6.3    | 8.8    |
| LOC388849 | 0.0 | 0.1 | 0.6 | Inf    | Inf    |
| LOC388948 | 0.0 | 0.0 | 0.1 | Inf    | Inf    |
| LOC389033 | 0.0 | 0.2 | 0.1 | Inf    | Inf    |
| LOC389458 | 0.5 | 1.1 | 1.1 | 2.2    | 2.1    |
| LOC400752 | 0.2 | 0.6 | 0.6 | 2.9    | 2.8    |
| LOC401134 | 0.0 | 0.3 | 0.2 | 9.9    | 5.3    |
| LOC643387 | 0.2 | 0.0 | 0.1 | 0.3    | 0.5    |
| LOC644248 | 0.0 | 0.0 | 0.5 | Inf    | Inf    |
| LOC645638 | 0.1 | 0.0 | 0.0 | #NAME? | #NAME? |
| LOC646214 | 0.5 | 2.1 | 2.2 | 4.5    | 4.8    |
| LOC646278 | 0.4 | 0.7 | 1.1 | 2.1    | 3.1    |
| LOC646862 | 0.1 | 0.0 | 0.0 | #NAME? | #NAME? |
| LOC654342 | 0.8 | 1.7 | 1.8 | 2.1    | 2.2    |
| LOC728218 | 0.0 | 0.1 | 0.1 | 2.7    | 4.1    |
| LOC728342 | 0.0 | 0.1 | 0.2 | 2.5    | 5.3    |
| LOC728392 | 0.0 | 0.2 | 0.3 | 7.5    | 13.5   |
| LOC728724 | 0.0 | 0.4 | 0.1 | Inf    | Inf    |
| LOC728739 | 0.0 | 0.1 | 0.2 | Inf    | Inf    |
| LOC729683 | 0.5 | 1.3 | 1.3 | 2.9    | 2.8    |
| LOC730091 | 0.0 | 0.1 | 0.2 | 2.1    | 3.6    |
| LONRF1    | 2.1 | 5.9 | 5.6 | 2.8    | 2.7    |
| LOXL2     | 0.0 | 0.1 | 0.2 | 2.6    | 3.2    |
| LOXL4     | 0.2 | 0.1 | 0.0 | 0.4    | 0.1    |
| LOX       | 0.1 | 0.3 | 0.6 | 2.6    | 4.7    |
| LPAL2     | 0.1 | 0.2 | 0.4 | 2.1    | 3.3    |
| LPAR4     | 0.0 | 0.2 | 0.2 | 13.9   | 13.6   |
| LPAR6     | 0.1 | 0.2 | 0.3 | 3.5    | 5.8    |
| LPCAT1    | 0.1 | 0.9 | 0.5 | 15.2   | 8.3    |
| LRIG1     | 0.9 | 2.1 | 2.2 | 2.3    | 2.4    |
| LRMP      | 2.8 | 6.0 | 5.7 | 2.1    | 2.0    |
| LRP12     | 3.3 | 8.5 | 8.4 | 2.6    | 2.5    |
| LRP2BP    | 0.1 | 0.2 | 0.1 | 3.3    | 2.1    |
| LRRC16A   | 0.8 | 1.9 | 1.6 | 2.3    | 2.0    |



|           |      |       |       |        |      |
|-----------|------|-------|-------|--------|------|
| LRRC1     | 0.1  | 0.2   | 0.2   | 3.0    | 3.6  |
| LRRC26    | 0.3  | 0.1   | 0.1   | 0.2    | 0.2  |
| LRRC70    | 1.2  | 0.4   | 0.4   | 0.3    | 0.3  |
| LRRC71    | 0.0  | 0.1   | 0.1   | 3.8    | 2.6  |
| LRRC73    | 0.0  | 0.1   | 0.1   | Inf    | Inf  |
| LRRC9     | 0.0  | 0.1   | 0.1   | Inf    | Inf  |
| LRRK1     | 0.3  | 0.8   | 1.0   | 2.9    | 3.8  |
| LRRN2     | 0.5  | 0.1   | 0.1   | 0.2    | 0.2  |
| LSP1      | 0.3  | 1.1   | 0.7   | 3.3    | 2.1  |
| LTB       | 0.0  | 0.3   | 0.1   | Inf    | Inf  |
| LTK       | 0.1  | 0.2   | 0.2   | 2.9    | 2.3  |
| LUM       | 0.0  | 0.3   | 0.2   | Inf    | Inf  |
| LURAP1    | 0.0  | 0.1   | 0.1   | 8.3    | 5.2  |
| LY6E      | 37.3 | 96.6  | 102.4 | 2.6    | 2.7  |
| LY6G5C    | 0.4  | 1.5   | 1.0   | 4.1    | 2.7  |
| LY6G6C    | 0.1  | 0.2   | 0.2   | 2.3    | 3.1  |
| LY6G6D    | 1.3  | 3.1   | 3.0   | 2.4    | 2.3  |
| LY75      | 0.2  | 2.0   | 2.2   | 9.4    | 10.2 |
| LY9       | 0.4  | 0.0   | 0.1   | #NAME? | 0.3  |
| LYNX1     | 0.1  | 0.4   | 0.3   | 3.8    | 3.2  |
| LYPD6B    | 0.1  | 0.5   | 0.4   | 3.8    | 2.9  |
| LYZ       | 1.8  | 11.0  | 8.9   | 6.2    | 5.0  |
| MAB21L3   | 0.4  | 1.5   | 1.4   | 3.8    | 3.4  |
| MAEA      | 33.8 | 16.0  | 15.1  | 0.5    | 0.4  |
| MAF       | 0.0  | 0.4   | 0.2   | 9.6    | 6.1  |
| MAGED1    | 15.9 | 36.2  | 37.0  | 2.3    | 2.3  |
| MAGI2-AS3 | 0.1  | 0.6   | 0.9   | 6.4    | 9.5  |
| MALAT1    | 57.5 | 118.4 | 144.2 | 2.1    | 2.5  |
| MALL      | 0.0  | 0.1   | 0.2   | 4.9    | 6.0  |
| MAL       | 0.3  | 1.1   | 1.2   | 3.3    | 3.6  |
| MAML2     | 0.1  | 0.2   | 0.2   | 2.1    | 2.5  |
| MAP10     | 0.5  | 1.1   | 1.1   | 2.1    | 2.1  |
| MAP1A     | 1.1  | 2.9   | 3.8   | 2.6    | 3.5  |
| MAP2      | 0.0  | 0.4   | 0.2   | 9.2    | 5.7  |
| MAP3K12   | 1.2  | 2.7   | 2.6   | 2.3    | 2.1  |
| MAP4K1    | 1.3  | 5.1   | 5.6   | 4.0    | 4.3  |
| MAP7D2    | 0.3  | 0.9   | 1.1   | 2.6    | 3.2  |
| MAP7      | 2.1  | 6.6   | 6.0   | 3.1    | 2.8  |
| MAP9      | 0.4  | 1.7   | 1.7   | 4.1    | 4.1  |
| MAPK11    | 0.3  | 0.7   | 0.6   | 2.2    | 2.0  |
| MAPK12    | 1.5  | 7.7   | 8.5   | 5.2    | 5.8  |
| MAPK15    | 0.0  | 0.1   | 0.2   | 7.6    | 10.4 |
| 1-Mar     | 0.1  | 0.6   | 0.4   | 6.6    | 4.3  |
| 2-Mar     | 17.5 | 6.8   | 6.7   | 0.4    | 0.4  |
| MARK2P9   | 0.2  | 0.0   | 0.0   | 0.1    | 0.2  |
| MARVELD1  | 4.0  | 11.0  | 11.7  | 2.8    | 2.9  |
| MATK      | 0.5  | 1.6   | 1.5   | 3.3    | 3.0  |

|           |        |        |        |        |        |
|-----------|--------|--------|--------|--------|--------|
| MATN1     | 0.0    | 0.0    | 0.2    | 2.1    | 7.4    |
| MATN2     | 0.1    | 0.5    | 0.6    | 3.4    | 4.3    |
| MB21D2    | 0.0    | 0.3    | 0.1    | 6.0    | 3.2    |
| MBNL1-AS1 | 0.1    | 0.2    | 0.2    | 4.6    | 3.8    |
| MBOAT4    | 0.0    | 0.1    | 0.1    | 6.9    | 5.2    |
| MCAM      | 0.0    | 0.2    | 0.2    | 7.4    | 6.3    |
| MCTP1     | 1.0    | 3.7    | 3.3    | 3.7    | 3.2    |
| MDFIC     | 0.1    | 0.3    | 0.2    | 4.3    | 2.6    |
| MDGA1     | 0.0    | 0.2    | 0.2    | 29.8   | 29.1   |
| MED12L    | 1.1    | 3.3    | 3.4    | 2.9    | 3.0    |
| MEF2B     | 1.2    | 0.4    | 0.1    | 0.3    | 0.1    |
| MEF2C     | 3.7    | 10.4   | 10.7   | 2.9    | 2.9    |
| MEG3      | 0.2    | 0.8    | 1.2    | 3.6    | 5.1    |
| MEGF6     | 0.1    | 0.4    | 0.4    | 4.6    | 4.3    |
| MEI1      | 0.0    | 0.3    | 0.3    | 9.4    | 10.0   |
| MEIS1     | 0.7    | 2.2    | 1.6    | 3.1    | 2.3    |
| MEIS3     | 0.0    | 0.1    | 0.1    | 2.8    | 3.8    |
| MEIS3P1   | 0.1    | 0.4    | 0.5    | 3.2    | 3.2    |
| MERTK     | 0.2    | 0.1    | 0.1    | 0.4    | 0.4    |
| MEST      | 3.8    | 9.4    | 8.8    | 2.4    | 2.3    |
| METTL7B   | 0.1    | 0.3    | 0.6    | 2.9    | 6.5    |
| MEX3A     | 0.2    | 0.8    | 1.0    | 4.6    | 5.7    |
| MEX3B     | 3.0    | 6.8    | 6.7    | 2.3    | 2.2    |
| MFHAS1    | 28.1   | 11.8   | 12.5   | 0.4    | 0.4    |
| MFSD2A    | 0.6    | 1.6    | 2.6    | 2.5    | 4.0    |
| MFSD2B    | 23.7   | 8.6    | 11.5   | 0.4    | 0.5    |
| MFSD7     | 0.2    | 0.4    | 0.5    | 2.5    | 3.2    |
| MGC16121  | 0.0    | 1.1    | 1.3    | 23.1   | 27.3   |
| MIAT      | 1.1    | 3.8    | 3.7    | 3.5    | 3.5    |
| MICAL1    | 1.7    | 3.8    | 3.9    | 2.3    | 2.3    |
| MID2      | 0.0    | 0.2    | 0.1    | 5.1    | 3.1    |
| MIR1248   | 78.5   | 0.0    | 0.0    | #NAME? | #NAME? |
| MIR1260B  | 337.3  | 0.0    | 0.0    | #NAME? | #NAME? |
| MIR155HG  | 0.3    | 0.7    | 0.9    | 2.7    | 3.4    |
| MIR17HG   | 1.0    | 3.9    | 3.3    | 4.0    | 3.4    |
| MIR223    | 219.5  | 0.0    | 22.6   | #NAME? | 0.1    |
| MIR4269   | 494.4  | 0.0    | 0.0    | #NAME? | #NAME? |
| MIR4440   | 160.4  | 0.0    | 0.0    | #NAME? | #NAME? |
| MIR4513   | 424.3  | 0.0    | 0.0    | #NAME? | #NAME? |
| MIR4690   | 5686.0 | 0.0    | 0.0    | #NAME? | #NAME? |
| MIR4722   | 0.0    | 4364.6 | 6501.2 | Inf    | Inf    |
| MIR4737   | 5597.1 | 739.5  | 2035.1 | 0.1    | 0.4    |
| MIR499A   | 20.1   | 0.0    | 0.0    | #NAME? | #NAME? |
| MIR5001   | 134.9  | 0.0    | 0.0    | #NAME? | #NAME? |
| MIR5047   | 674.5  | 54.9   | 63.0   | 0.1    | 0.1    |
| MIR548I2  | 3.9    | 0.0    | 0.0    | #NAME? | #NAME? |
| MIR612    | 0.0    | 137.2  | 63.0   | Inf    | Inf    |

|            |        |        |        |        |        |
|------------|--------|--------|--------|--------|--------|
| MIR659     | 174.7  | 0.0    | 0.0    | #NAME? | #NAME? |
| MIR663A    | 6368.0 | 1797.5 | 2194.4 | 0.3    | 0.3    |
| MIR663B    | 212.7  | 80.0   | 72.1   | 0.4    | 0.3    |
| MIR941-1   | 29.9   | 0.0    | 0.0    | #NAME? | #NAME? |
| MLLT10P1   | 0.2    | 0.4    | 1.0    | 2.5    | 6.4    |
| MLLT11     | 1.4    | 6.8    | 6.6    | 5.0    | 4.9    |
| MLPH       | 0.5    | 0.1    | 0.1    | 0.2    | 0.2    |
| MLXIPL     | 0.0    | 0.1    | 0.1    | 3.9    | 2.8    |
| MMP11      | 0.0    | 0.1    | 0.3    | 3.2    | 8.0    |
| MMP17      | 0.1    | 0.3    | 0.4    | 2.1    | 3.1    |
| MMP2       | 0.3    | 0.9    | 1.0    | 3.4    | 3.6    |
| MMP9       | 0.0    | 0.3    | 0.3    | 10.7   | 9.9    |
| MMRN1      | 2.1    | 7.2    | 6.5    | 3.4    | 3.1    |
| MNDA       | 0.1    | 0.6    | 0.5    | 5.8    | 5.2    |
| MORF4L2-AS | 0.2    | 0.5    | 0.4    | 2.9    | 2.0    |
| MPDZ       | 0.6    | 1.8    | 1.8    | 3.1    | 3.1    |
| MPL        | 0.2    | 0.6    | 0.9    | 2.9    | 4.2    |
| MPO        | 0.2    | 5.9    | 5.4    | 26.1   | 23.7   |
| MPP7       | 1.6    | 3.4    | 3.5    | 2.1    | 2.2    |
| MPZL3      | 0.7    | 0.2    | 0.3    | 0.3    | 0.4    |
| MPZ        | 0.5    | 1.1    | 1.3    | 2.1    | 2.5    |
| MRAP2      | 1.2    | 0.1    | 0.2    | 0.1    | 0.2    |
| MRV11      | 0.2    | 0.7    | 0.6    | 2.8    | 2.5    |
| MS4A2      | 4.0    | 1.9    | 1.7    | 0.5    | 0.4    |
| MS4A3      | 1.6    | 9.1    | 7.9    | 5.7    | 4.9    |
| MS4A6A     | 0.2    | 0.0    | 0.1    | #NAME? | 0.4    |
| MSC        | 0.1    | 0.4    | 0.4    | 2.6    | 2.8    |
| MSMO1      | 23.5   | 70.1   | 64.4   | 3.0    | 2.7    |
| MSRB3      | 1.7    | 3.6    | 3.4    | 2.1    | 2.0    |
| MSTO2P     | 0.2    | 0.4    | 0.3    | 2.4    | 2.2    |
| MSX2P1     | 0.1    | 0.5    | 0.5    | 5.2    | 5.6    |
| MT1G       | 2.4    | 0.5    | 0.0    | 0.2    | #NAME? |
| MTMR11     | 0.2    | 0.5    | 0.6    | 2.7    | 3.0    |
| MTMR7      | 0.5    | 1.1    | 1.1    | 2.3    | 2.3    |
| MTMR9LP    | 0.1    | 0.3    | 0.1    | 3.7    | 2.1    |
| MTRNR2L2   | 411.3  | 907.6  | 866.1  | 2.2    | 2.1    |
| MTRNR2L5   | 0.1    | 0.1    | 0.1    | 2.3    | 2.1    |
| MTRNR2L6   | 0.3    | 0.9    | 0.8    | 3.0    | 2.6    |
| MX2        | 0.0    | 0.4    | 0.3    | 20.5   | 16.3   |
| MXI1       | 25.0   | 12.1   | 11.1   | 0.5    | 0.4    |
| MYBL1      | 0.0    | 0.1    | 0.2    | 9.4    | 19.5   |
| MYCT1      | 0.8    | 2.9    | 3.0    | 3.8    | 3.9    |
| MYEF2      | 2.0    | 4.7    | 5.0    | 2.3    | 2.5    |
| MYEOV      | 0.6    | 1.7    | 2.0    | 3.0    | 3.4    |
| MYL10      | 0.1    | 0.0    | 0.0    | 0.2    | #NAME? |
| MYLIP      | 6.5    | 2.9    | 1.6    | 0.4    | 0.2    |
| MYLK4      | 0.1    | 0.7    | 0.5    | 4.9    | 3.5    |

|           |      |      |      |          |      |
|-----------|------|------|------|----------|------|
| MYLK      | 1.2  | 4.2  | 3.4  | 3.4      | 2.8  |
| MYO10     | 0.1  | 0.3  | 0.3  | 3.5      | 3.6  |
| MYO18B    | 0.1  | 0.3  | 0.2  | 2.9      | 2.0  |
| MYO1F     | 1.6  | 4.3  | 4.2  | 2.7      | 2.6  |
| MYO1G     | 2.1  | 15.0 | 17.7 | 7.3      | 8.6  |
| MYO5A     | 0.3  | 0.7  | 0.8  | 2.3      | 2.8  |
| MYOM1     | 0.2  | 1.0  | 1.2  | 4.6      | 5.6  |
| MZB1      | 0.0  | 0.2  | 0.2  | Inf      | Inf  |
| N4BP2     | 1.7  | 4.4  | 4.6  | 2.5      | 2.6  |
| NAALAD2   | 0.0  | 0.3  | 0.2  | 6.8      | 4.7  |
| NAALADL1  | 0.2  | 0.5  | 0.5  | 2.5      | 2.3  |
| NAP1L2    | 0.0  | 0.3  | 0.3  | 12.5     | 11.0 |
| NAP1L3    | 0.1  | 0.8  | 0.3  | 14.7     | 5.5  |
| NAP1L6    | 0.0  | 0.1  | 0.0  | 6.9      | 2.1  |
| NAT8L     | 0.0  | 0.1  | 0.1  | 17.5     | 27.5 |
| NBEA      | 0.0  | 0.1  | 0.1  | 2.3      | 2.8  |
| NBEAP1    | 0.2  | 0.9  | 1.0  | 4.0      | 4.3  |
| NBL1      | 14.7 | 4.1  | 6.2  | 0.3      | 0.4  |
| NBPF10    | 0.2  | 0.7  | 0.7  | 3.0      | 2.8  |
| NBPF16    | 0.3  | 0.7  | 0.7  | 2.7      | 2.6  |
| NCEH1     | 17.6 | 7.1  | 5.9  | 0.4      | 0.3  |
| NCF1C     | 0.2  | 0.3  | 0.5  | 2.0      | 3.3  |
| NCOR1P1   | 0.0  | 0.1  | 0.5  | Inf      | Inf  |
| NDRG2     | 0.7  | 3.8  | 4.5  | 5.2      | 6.1  |
| NDST3     | 0.0  | 0.1  | 0.1  | 2.9      | 2.9  |
| NEDD8-MDP | 0.0  | 2.7  | 0.0  | 522191.4 | 4.5  |
| NEFH      | 2.0  | 4.5  | 4.1  | 2.2      | 2.0  |
| NEK6      | 1.2  | 2.8  | 2.6  | 2.3      | 2.2  |
| NES       | 0.0  | 0.1  | 0.2  | 9.8      | 15.3 |
| NEU4      | 0.1  | 0.3  | 0.5  | 2.2      | 3.3  |
| NEURL3    | 0.2  | 0.1  | 0.0  | 0.3      | 0.1  |
| NEURL     | 0.3  | 0.7  | 0.7  | 2.5      | 2.7  |
| NEXN      | 0.4  | 1.6  | 1.2  | 4.4      | 3.4  |
| NFATC4    | 0.0  | 1.9  | 1.9  | 47.7     | 48.2 |
| NFIB      | 0.1  | 0.5  | 0.4  | 7.3      | 5.4  |
| NHSL2     | 0.0  | 0.1  | 0.1  | 2.1      | 4.6  |
| NID1      | 0.2  | 2.0  | 1.7  | 11.9     | 10.5 |
| NIPBL     | 6.0  | 12.7 | 13.2 | 2.1      | 2.2  |
| NKAPL     | 0.0  | 0.1  | 0.1  | 6.2      | 5.2  |
| NKG7      | 0.2  | 1.0  | 0.5  | 4.4      | 2.4  |
| NKPD1     | 0.0  | 0.1  | 0.1  | 5.2      | 10.0 |
| NLGN2     | 0.3  | 0.6  | 0.6  | 2.1      | 2.2  |
| NLRC3     | 0.3  | 1.0  | 1.0  | 3.9      | 3.7  |
| NLRC4     | 0.0  | 0.2  | 0.2  | 10.4     | 10.5 |
| NLRP1     | 0.2  | 0.8  | 0.8  | 4.7      | 4.8  |
| NLRP3     | 0.1  | 0.3  | 0.3  | 3.7      | 3.1  |
| NME5      | 0.1  | 0.4  | 0.2  | 6.8      | 3.6  |

|            |      |      |      |        |        |
|------------|------|------|------|--------|--------|
| NMU        | 3.1  | 1.3  | 0.7  | 0.4    | 0.2    |
| NOL3       | 0.5  | 1.0  | 1.2  | 2.2    | 2.6    |
| NOMO3      | 0.2  | 0.4  | 0.4  | 2.5    | 2.4    |
| NOS1AP     | 0.1  | 0.2  | 0.3  | 2.9    | 5.5    |
| NOTCH1     | 0.4  | 1.0  | 1.0  | 2.6    | 2.6    |
| NOTUM      | 0.1  | 0.3  | 0.4  | 2.1    | 2.8    |
| NOV        | 0.1  | 0.5  | 0.3  | 5.0    | 3.4    |
| NPC1L1     | 0.8  | 1.6  | 1.7  | 2.0    | 2.2    |
| NPDC1      | 0.1  | 1.0  | 1.1  | 12.0   | 12.7   |
| NPM2       | 0.5  | 1.6  | 1.8  | 3.4    | 3.8    |
| NPR3       | 1.4  | 3.1  | 3.0  | 2.2    | 2.1    |
| NPRL3      | 37.7 | 16.1 | 17.9 | 0.4    | 0.5    |
| NPTX1      | 0.1  | 0.4  | 0.3  | 4.4    | 3.5    |
| NQO1       | 4.8  | 18.3 | 17.3 | 3.8    | 3.6    |
| NROB1      | 0.0  | 0.0  | 0.1  | Inf    | Inf    |
| NR5A2      | 0.2  | 1.1  | 0.9  | 4.7    | 3.8    |
| NRARP      | 0.9  | 4.4  | 2.9  | 5.0    | 3.3    |
| NRG4       | 0.2  | 0.7  | 0.7  | 4.3    | 4.3    |
| NRP2       | 0.0  | 0.2  | 0.2  | 8.0    | 6.4    |
| NRTN       | 0.2  | 0.0  | 0.0  | 0.3    | #NAME? |
| NRXN2      | 0.1  | 0.9  | 0.8  | 15.1   | 13.6   |
| NSRP1      | 7.0  | 15.3 | 14.7 | 2.2    | 2.1    |
| NSUN5P2    | 1.0  | 2.7  | 2.7  | 2.6    | 2.6    |
| NT5C1B-RDH | 0.0  | 0.1  | 0.0  | 9069.2 | 1796.4 |
| NTNG2      | 0.2  | 0.6  | 0.7  | 2.4    | 2.8    |
| NTRK1      | 5.1  | 11.3 | 11.7 | 2.2    | 2.3    |
| NTRK3      | 0.0  | 0.2  | 0.2  | 12.2   | 11.8   |
| NTS        | 3.7  | 11.3 | 7.5  | 3.1    | 2.0    |
| NUDT11     | 0.0  | 0.5  | 0.5  | 13.8   | 12.9   |
| NUDT7      | 5.5  | 1.7  | 2.1  | 0.3    | 0.4    |
| NXF3       | 0.1  | 0.3  | 0.4  | 4.3    | 5.7    |
| NXPH4      | 0.0  | 0.1  | 0.1  | 2.1    | 3.6    |
| NYAP1      | 0.9  | 0.3  | 0.3  | 0.4    | 0.3    |
| NYNRIN     | 1.4  | 3.7  | 4.1  | 2.6    | 2.9    |
| OAF        | 1.2  | 2.8  | 3.8  | 2.4    | 3.3    |
| OAS1       | 0.0  | 0.4  | 0.1  | Inf    | Inf    |
| OBSCN      | 0.2  | 0.8  | 0.9  | 3.6    | 4.1    |
| OBSL1      | 0.7  | 3.5  | 3.8  | 5.1    | 5.6    |
| ODF2L      | 2.5  | 5.4  | 5.0  | 2.2    | 2.0    |
| OR10Z1     | 0.0  | 0.4  | 0.3  | Inf    | Inf    |
| OR2AT4     | 0.0  | 0.2  | 0.3  | 4.7    | 7.2    |
| OR2B6      | 0.0  | 0.2  | 0.2  | Inf    | Inf    |
| OR52H1     | 0.0  | 0.1  | 0.1  | Inf    | Inf    |
| OR56B1     | 0.0  | 0.0  | 0.1  | Inf    | Inf    |
| OR7E91P    | 0.1  | 0.0  | 0.0  | #NAME? | #NAME? |
| OR8G2      | 0.1  | 0.0  | 0.0  | #NAME? | #NAME? |
| ORAI2      | 2.8  | 6.0  | 6.2  | 2.2    | 2.2    |

|          |      |      |      |      |      |
|----------|------|------|------|------|------|
| OSBPL6   | 4.1  | 10.2 | 10.1 | 2.5  | 2.5  |
| OSGIN1   | 1.6  | 5.7  | 6.0  | 3.5  | 3.7  |
| OVOL3    | 0.0  | 0.1  | 0.1  | Inf  | Inf  |
| OXER1    | 0.0  | 0.1  | 0.1  | 6.2  | 5.2  |
| P2RY12   | 0.1  | 0.7  | 0.4  | 7.3  | 4.7  |
| P4HA2    | 0.1  | 0.4  | 0.3  | 2.8  | 2.2  |
| PAK1     | 29.8 | 10.8 | 10.7 | 0.4  | 0.4  |
| PALM     | 0.6  | 1.3  | 1.8  | 2.0  | 2.9  |
| PAM      | 3.0  | 9.3  | 9.0  | 3.1  | 3.0  |
| PAN3-AS1 | 0.4  | 1.3  | 1.5  | 3.0  | 3.5  |
| PAOX     | 0.2  | 0.8  | 0.5  | 3.8  | 2.3  |
| PAQR8    | 0.6  | 1.5  | 1.2  | 2.6  | 2.0  |
| PAQR9    | 12.4 | 1.7  | 2.0  | 0.1  | 0.2  |
| PAR5     | 0.3  | 1.1  | 1.2  | 3.4  | 3.5  |
| PARD3    | 0.3  | 0.0  | 0.1  | 0.2  | 0.2  |
| PARP8    | 0.4  | 1.3  | 1.2  | 3.7  | 3.5  |
| PARVG    | 0.8  | 7.8  | 6.9  | 10.2 | 9.0  |
| PAWR     | 1.0  | 3.5  | 2.9  | 3.6  | 3.0  |
| PCBP4    | 0.5  | 1.3  | 1.3  | 2.6  | 2.6  |
| PCDH1    | 0.3  | 0.1  | 0.2  | 0.4  | 0.4  |
| PCDH20   | 0.0  | 0.2  | 0.2  | 16.1 | 14.2 |
| PCDH9    | 0.1  | 0.2  | 0.2  | 3.4  | 3.5  |
| PCDHGB3  | 0.0  | 0.0  | 0.1  | 2.1  | 10.5 |
| PCDHGB5  | 0.0  | 0.1  | 0.1  | 2.4  | 5.6  |
| PCK2     | 49.6 | 16.0 | 17.5 | 0.3  | 0.4  |
| PCNXL2   | 0.0  | 0.1  | 0.2  | Inf  | Inf  |
| PCSK1N   | 0.3  | 1.3  | 0.7  | 5.0  | 2.6  |
| PCSK1    | 0.0  | 0.1  | 0.1  | 18.8 | 12.6 |
| PDCD1    | 0.0  | 0.2  | 0.2  | 6.6  | 5.2  |
| PDE4D    | 0.2  | 0.6  | 0.7  | 3.6  | 3.9  |
| PDE5A    | 0.5  | 1.3  | 1.0  | 2.7  | 2.2  |
| PDE6B    | 0.8  | 1.9  | 2.3  | 2.3  | 2.8  |
| PDE6H    | 0.0  | 0.2  | 0.1  | Inf  | Inf  |
| PDE8B    | 0.1  | 0.2  | 0.2  | 4.0  | 2.8  |
| PDGFD    | 0.1  | 0.5  | 0.8  | 5.4  | 8.2  |
| PDGFRA   | 0.0  | 0.1  | 0.1  | 12.6 | 8.5  |
| PDK2     | 1.1  | 6.0  | 7.9  | 5.4  | 7.1  |
| PDLIM2   | 0.1  | 0.4  | 0.3  | 4.1  | 2.8  |
| PDLIM4   | 0.1  | 0.2  | 0.2  | 2.2  | 2.4  |
| PDZK1IP1 | 2.4  | 0.2  | 0.7  | 0.1  | 0.3  |
| PEAR1    | 5.2  | 10.5 | 11.1 | 2.0  | 2.1  |
| PECAM1   | 0.9  | 2.6  | 2.6  | 3.0  | 3.0  |
| PEG3-AS1 | 0.0  | 0.1  | 0.2  | 4.8  | 6.2  |
| PEG3     | 0.0  | 0.1  | 0.1  | 4.1  | 2.1  |
| PER1     | 44.8 | 15.7 | 14.3 | 0.4  | 0.3  |
| PEX3     | 4.1  | 13.6 | 12.1 | 3.3  | 2.9  |
| PF4      | 20.9 | 55.2 | 48.9 | 2.6  | 2.3  |

|            |      |      |      |                 |                |
|------------|------|------|------|-----------------|----------------|
| PFN2       | 0.0  | 0.2  | 0.1  | 8.6             | 6.1            |
| PGAP1      | 0.0  | 0.2  | 0.1  | 3.8             | 2.4            |
| PGF        | 3.5  | 1.2  | 1.2  | 0.3             | 0.3            |
| PGM1       | 0.5  | 4.1  | 4.6  | 7.7             | 8.8            |
| PHACTR1    | 0.5  | 1.2  | 1.1  | 2.3             | 2.2            |
| PHGDH      | 1.5  | 0.4  | 0.4  | 0.2             | 0.3            |
| PHIP       | 4.8  | 11.4 | 11.0 | 2.4             | 2.3            |
| PHKA1      | 0.3  | 0.6  | 0.7  | 2.1             | 2.5            |
| PHLDA1     | 0.4  | 0.9  | 1.1  | 2.4             | 3.1            |
| PHLDB1     | 0.7  | 1.9  | 2.2  | 2.6             | 3.2            |
| PHOSPHO1   | 20.3 | 3.6  | 4.8  | 0.2             | 0.2            |
| PHOSPHO2-K | 0.0  | 0.3  | 0.2  | 2108.7          | 1044.2         |
| PIEZO2     | 0.0  | 0.1  | 0.2  | 11.2            | 20.5           |
| PIFO       | 0.2  | 1.1  | 1.0  | 4.8             | 4.1            |
| PIGQ       | 60.5 | 21.8 | 26.4 | 0.4             | 0.4            |
| PIK3C2A    | 2.0  | 4.3  | 4.6  | 2.2             | 2.3            |
| PIK3CD     | 0.6  | 2.2  | 2.8  | 3.8             | 4.8            |
| PIK3R5     | 0.0  | 0.5  | 0.5  | 16.7            | 17.2           |
| PIK3R6     | 0.6  | 2.1  | 1.9  | 3.4             | 3.0            |
| PILRA      | 0.3  | 0.9  | 0.7  | 3.1             | 2.3            |
| PIR-FIGF   | 0.0  | 0.6  | 0.0  | 5607241467649.7 | 364547930128.2 |
| PITPNM2    | 1.0  | 3.5  | 3.7  | 3.6             | 3.7            |
| PITX1      | 2.5  | 0.3  | 0.3  | 0.1             | 0.1            |
| PIWIL3     | 0.2  | 0.9  | 0.7  | 5.0             | 3.9            |
| PKD1L3     | 0.3  | 0.0  | 0.1  | 0.1             | 0.3            |
| PKDCC      | 0.4  | 0.2  | 0.1  | 0.4             | 0.3            |
| PKHD1L1    | 0.3  | 1.0  | 1.1  | 3.1             | 3.3            |
| PLA2G1B    | 0.1  | 0.4  | 0.4  | 5.7             | 5.9            |
| PLA2G4B    | 2.4  | 0.8  | 0.2  | 0.4             | 0.1            |
| PLA2G7     | 0.0  | 0.2  | 0.2  | 8.2             | 11.5           |
| PLAC8      | 1.4  | 5.3  | 5.0  | 3.7             | 3.5            |
| PLCB2      | 2.4  | 7.1  | 7.4  | 2.9             | 3.1            |
| PLCB4      | 0.1  | 0.6  | 0.4  | 5.0             | 3.5            |
| PLCH1      | 0.1  | 0.3  | 0.3  | 4.1             | 3.6            |
| PLEKHA2    | 3.7  | 8.2  | 8.3  | 2.2             | 2.3            |
| PLEKHB1    | 0.1  | 0.3  | 0.3  | 3.9             | 4.2            |
| PLEKHG1    | 0.4  | 1.2  | 1.3  | 3.1             | 3.3            |
| PLEKHG2    | 0.5  | 1.6  | 1.6  | 3.0             | 3.0            |
| PLEKHG3    | 0.2  | 1.5  | 1.1  | 9.0             | 6.2            |
| PLEKHG5    | 0.0  | 0.1  | 0.1  | 3.4             | 3.5            |
| PLEKHH2    | 0.2  | 0.1  | 0.1  | 0.4             | 0.4            |
| PLEKHH3    | 39.3 | 5.3  | 5.4  | 0.1             | 0.1            |
| PLEK       | 19.4 | 58.0 | 51.5 | 3.0             | 2.7            |
| PLIN5      | 0.9  | 0.3  | 0.4  | 0.4             | 0.4            |
| PLOD2      | 1.3  | 3.7  | 3.7  | 2.8             | 2.8            |
| PLS3       | 0.1  | 1.7  | 1.2  | 18.2            | 12.7           |
| PLSCR3     | 1.8  | 5.5  | 5.0  | 3.0             | 2.7            |

|            |       |       |       |            |      |
|------------|-------|-------|-------|------------|------|
| PLXDC2     | 1.3   | 2.9   | 2.6   | 2.3        | 2.1  |
| PLXNB1     | 0.0   | 0.3   | 0.2   | 9.9        | 7.4  |
| PMM1       | 17.0  | 5.1   | 5.4   | 0.3        | 0.3  |
| PNLIP      | 0.1   | 0.4   | 0.5   | 6.2        | 7.3  |
| PNMAL1     | 0.3   | 0.7   | 0.8   | 2.8        | 3.2  |
| PNPLA3     | 0.1   | 0.4   | 0.5   | 3.7        | 4.4  |
| POLK       | 3.2   | 7.2   | 6.8   | 2.2        | 2.1  |
| POU4F1     | 0.4   | 0.8   | 0.8   | 2.2        | 2.1  |
| PPAPDC1A   | 4.2   | 0.8   | 0.4   | 0.2        | 0.1  |
| PPBP       | 53.5  | 122.9 | 117.0 | 2.3        | 2.2  |
| PPFIBP1    | 1.6   | 5.7   | 5.6   | 3.7        | 3.6  |
| PPIF       | 48.3  | 110.7 | 100.7 | 2.3        | 2.1  |
| PPIL6      | 0.1   | 0.1   | 0.2   | 2.8        | 3.5  |
| PPM1N      | 0.1   | 0.6   | 0.7   | 6.2        | 7.1  |
| PPP1R14A   | 0.8   | 5.6   | 5.2   | 7.3        | 6.8  |
| PPP1R15A   | 94.5  | 41.4  | 37.1  | 0.4        | 0.4  |
| PPP1R16B   | 0.2   | 2.3   | 2.3   | 12.3       | 12.3 |
| PPP1R18    | 3.4   | 10.0  | 9.7   | 2.9        | 2.8  |
| PPP2R5B    | 16.5  | 4.4   | 4.2   | 0.3        | 0.3  |
| PPP4R1L    | 0.5   | 0.2   | 0.2   | 0.4        | 0.4  |
| PRAM1      | 0.0   | 0.1   | 0.2   | 3.8        | 5.8  |
| PRDX2      | 861.2 | 356.9 | 379.0 | 0.4        | 0.4  |
| PRF1       | 0.0   | 0.1   | 0.1   | Inf        | Inf  |
| PRH2       | 0.0   | 0.1   | 0.1   | 2.2        | 3.6  |
| PRKACB     | 7.0   | 32.5  | 26.6  | 4.7        | 3.8  |
| PRKAG2     | 2.2   | 7.6   | 6.6   | 3.4        | 3.0  |
| PRKAR2A    | 11.7  | 5.6   | 5.6   | 0.5        | 0.5  |
| PRKD1      | 0.1   | 0.5   | 0.3   | 3.6        | 2.3  |
| PRKG1-AS1  | 0.0   | 0.2   | 0.1   | 3.7        | 3.5  |
| PRKG1      | 0.2   | 0.5   | 0.6   | 3.3        | 3.9  |
| PROB1      | 0.2   | 0.5   | 0.4   | 3.3        | 2.7  |
| PROCR      | 0.2   | 0.5   | 0.4   | 3.3        | 2.7  |
| PRODH      | 0.1   | 0.3   | 0.3   | 3.1        | 2.8  |
| PROM1      | 0.1   | 0.2   | 0.3   | 2.1        | 3.3  |
| PROX2      | 0.1   | 0.2   | 0.3   | 3.5        | 5.8  |
| PRR4       | 0.0   | 0.4   | 0.0   | 20300.3    | 4.8  |
| PRR5-ARHGA | 0.0   | 0.2   | 0.0   | 19351826.9 | 66.6 |
| PRR5L      | 0.1   | 0.2   | 0.3   | 3.0        | 3.7  |
| PRR7       | 1.2   | 2.4   | 2.9   | 2.0        | 2.4  |
| PRRG1      | 0.2   | 0.6   | 0.7   | 3.5        | 4.1  |
| PRRT2      | 0.1   | 0.3   | 0.4   | 3.8        | 5.1  |
| PRSS23     | 0.7   | 3.5   | 3.2   | 5.1        | 4.8  |
| PRSS36     | 0.1   | 0.2   | 0.2   | 2.3        | 2.6  |
| PRSS3      | 0.0   | 0.9   | 0.1   | Inf        | Inf  |
| PRSS57     | 7.2   | 19.1  | 21.4  | 2.6        | 3.0  |
| PRSS8      | 0.4   | 0.1   | 0.2   | 0.4        | 0.4  |
| PRTFDC1    | 1.4   | 4.6   | 3.4   | 3.3        | 2.4  |



|             |      |      |      |         |         |
|-------------|------|------|------|---------|---------|
| PRTN3       | 0.0  | 0.4  | 0.1  | 12.1    | 4.1     |
| PRUNE2      | 0.1  | 0.6  | 0.5  | 5.1     | 4.7     |
| PSAT1       | 23.9 | 8.2  | 6.4  | 0.3     | 0.3     |
| PSMB8       | 10.7 | 26.7 | 25.0 | 2.5     | 2.3     |
| PSMB9       | 1.3  | 4.8  | 4.3  | 3.8     | 3.4     |
| PSPN        | 0.0  | 0.2  | 0.3  | Inf     | Inf     |
| PTCRA       | 0.7  | 0.1  | 0.0  | 0.2     | #NAME?  |
| PTGDR2      | 0.3  | 0.8  | 0.8  | 2.7     | 2.8     |
| PTGDS       | 0.8  | 3.0  | 3.4  | 3.7     | 4.2     |
| PTGER2      | 0.6  | 3.8  | 3.4  | 6.0     | 5.4     |
| PTGER3      | 0.1  | 1.4  | 1.2  | 10.6    | 9.7     |
| PTGER4P2-CI | 0.0  | 0.1  | 0.1  | 4.4     | 3.2     |
| PTGES       | 0.4  | 0.0  | 0.0  | 0.1     | 0.1     |
| PTH2R       | 0.1  | 0.3  | 0.3  | 4.8     | 3.9     |
| PTHLH       | 0.1  | 0.0  | 0.0  | 0.1     | #NAME?  |
| PTK7        | 0.3  | 1.4  | 1.4  | 4.8     | 5.0     |
| PTP4A3      | 0.3  | 3.0  | 3.2  | 11.1    | 11.7    |
| PTPDC1      | 0.8  | 0.3  | 0.3  | 0.3     | 0.4     |
| PTPLAD2     | 7.2  | 15.0 | 15.3 | 2.1     | 2.1     |
| PTPN13      | 0.1  | 0.6  | 0.5  | 6.7     | 5.7     |
| PTPN22      | 3.4  | 9.0  | 8.4  | 2.7     | 2.5     |
| PTPRCAP     | 1.1  | 2.3  | 2.5  | 2.1     | 2.3     |
| PTPRC       | 8.6  | 25.9 | 23.3 | 3.0     | 2.7     |
| PTPRH       | 0.4  | 0.1  | 0.1  | 0.2     | 0.4     |
| PTPRR       | 0.4  | 0.9  | 1.1  | 2.1     | 2.6     |
| PTPRS       | 0.1  | 0.4  | 0.4  | 6.0     | 6.3     |
| PTX3        | 0.0  | 0.3  | 0.5  | Inf     | Inf     |
| PUS7L       | 2.7  | 5.5  | 6.5  | 2.0     | 2.4     |
| PVALB       | 1.7  | 4.9  | 4.8  | 2.9     | 2.9     |
| PVRIG       | 0.4  | 0.8  | 0.9  | 2.2     | 2.3     |
| PYCRL       | 5.7  | 2.7  | 2.8  | 0.5     | 0.5     |
| QPCT        | 0.1  | 0.6  | 0.3  | 7.4     | 3.9     |
| RAB11FIP4   | 0.2  | 1.0  | 1.2  | 6.2     | 7.5     |
| RAB11FIP5   | 0.0  | 0.5  | 0.7  | 12.1    | 16.3    |
| RAB20       | 0.1  | 0.4  | 0.2  | 5.7     | 2.4     |
| RAB27B      | 3.3  | 16.8 | 14.2 | 5.1     | 4.3     |
| RAB31       | 3.1  | 8.3  | 8.8  | 2.7     | 2.9     |
| RAB32       | 2.3  | 8.7  | 6.4  | 3.8     | 2.7     |
| RAB33A      | 1.4  | 3.6  | 3.9  | 2.7     | 2.9     |
| RAB34       | 0.9  | 3.7  | 2.3  | 4.3     | 2.7     |
| RAB36       | 0.1  | 0.6  | 0.5  | 4.2     | 3.4     |
| RAB37       | 3.5  | 9.8  | 9.7  | 2.8     | 2.8     |
| RAB3A       | 0.4  | 0.2  | 0.1  | 0.4     | 0.2     |
| RAB3D       | 0.5  | 1.5  | 1.4  | 2.9     | 2.8     |
| RAB3IL1     | 27.5 | 11.7 | 13.6 | 0.4     | 0.5     |
| RAB44       | 0.3  | 1.1  | 1.1  | 3.1     | 3.1     |
| RAB4B-EGLN  | 0.0  | 0.6  | 0.6  | 43883.0 | 42676.4 |

|             |       |      |      |             |          |
|-------------|-------|------|------|-------------|----------|
| RAB9B       | 0.3   | 0.9  | 0.9  | 3.5         | 3.7      |
| RAC3        | 2.7   | 8.7  | 8.9  | 3.2         | 3.3      |
| RAD23A      | 127.6 | 59.5 | 62.3 | 0.5         | 0.5      |
| RAD51L3-RFF | 0.7   | 0.0  | 0.0  | 0.0         | 0.0      |
| RAET1E      | 0.4   | 1.6  | 1.1  | 4.1         | 2.8      |
| RAET1G      | 0.1   | 0.3  | 0.5  | 5.4         | 8.7      |
| RALGPS1     | 0.1   | 0.2  | 0.2  | 3.0         | 2.8      |
| RAMP1       | 2.5   | 8.0  | 7.6  | 3.2         | 3.0      |
| RANBP2      | 5.6   | 14.4 | 14.1 | 2.6         | 2.5      |
| RAP1GAP2    | 0.3   | 0.9  | 0.9  | 3.2         | 3.1      |
| RAPGEF3     | 0.0   | 0.1  | 0.1  | 3.1         | 2.2      |
| RARB        | 0.0   | 0.1  | 0.1  | 11.1        | 8.4      |
| RASA4       | 0.9   | 2.8  | 2.7  | 3.1         | 2.9      |
| RASAL2-AS1  | 0.1   | 0.0  | 0.1  | 0.3         | 0.4      |
| RASGRP1     | 0.1   | 0.2  | 0.2  | 2.7         | 2.8      |
| RASGRP2     | 1.8   | 3.7  | 4.2  | 2.1         | 2.3      |
| RASIP1      | 1.0   | 0.4  | 0.3  | 0.4         | 0.3      |
| RASSF2      | 0.3   | 1.3  | 1.1  | 3.7         | 3.2      |
| RB1CC1      | 6.1   | 13.0 | 13.2 | 2.1         | 2.2      |
| RBAK-LOC38! | 0.0   | 0.3  | 0.0  | 170262860.8 | 109941.6 |
| RBKS        | 2.0   | 0.8  | 0.6  | 0.4         | 0.3      |
| RBM11       | 0.1   | 0.3  | 0.3  | 4.7         | 4.4      |
| RBM38       | 76.5  | 33.6 | 37.6 | 0.4         | 0.5      |
| RBM41       | 7.2   | 15.6 | 14.4 | 2.2         | 2.0      |
| BPMS2       | 0.3   | 2.1  | 1.7  | 6.1         | 4.8      |
| RCAN3AS     | 0.2   | 0.8  | 1.1  | 4.5         | 6.3      |
| RCAN3       | 0.5   | 1.5  | 1.4  | 2.9         | 2.7      |
| RCOR2       | 0.0   | 0.2  | 0.1  | 15.9        | 9.4      |
| RDH10       | 4.5   | 11.9 | 11.0 | 2.6         | 2.4      |
| RDH12       | 0.0   | 0.1  | 0.1  | Inf         | Inf      |
| RELL2       | 0.7   | 1.9  | 2.2  | 2.9         | 3.2      |
| RELN        | 0.1   | 0.0  | 0.0  | 0.4         | 0.4      |
| REV3L       | 3.1   | 8.7  | 8.4  | 2.8         | 2.7      |
| RFTN1       | 5.2   | 12.9 | 11.5 | 2.5         | 2.2      |
| RFX8        | 0.0   | 0.6  | 0.5  | 16.1        | 12.5     |
| RGAG1       | 0.1   | 0.2  | 0.4  | 2.4         | 4.6      |
| RGAG4       | 0.0   | 0.2  | 0.2  | 5.0         | 3.5      |
| RGPD4       | 0.1   | 0.2  | 0.1  | 3.0         | 2.2      |
| RGS18       | 2.2   | 9.2  | 8.3  | 4.2         | 3.7      |
| RGS1        | 0.1   | 0.2  | 0.3  | 2.0         | 3.1      |
| RGS6        | 2.0   | 5.7  | 6.5  | 2.9         | 3.3      |
| RGS9        | 0.3   | 0.0  | 0.1  | 0.0         | 0.4      |
| RHD         | 11.4  | 4.5  | 5.3  | 0.4         | 0.5      |
| RHEBL1      | 2.9   | 7.1  | 6.5  | 2.5         | 2.2      |
| RHOBTB1     | 0.8   | 2.0  | 2.6  | 2.6         | 3.4      |
| RHOC        | 14.4  | 41.7 | 43.5 | 2.9         | 3.0      |
| RHOQ        | 2.6   | 6.6  | 5.3  | 2.6         | 2.1      |

|            |       |      |      |        |        |
|------------|-------|------|------|--------|--------|
| RHOU       | 0.1   | 0.5  | 0.5  | 6.0    | 6.3    |
| RHOV       | 1.0   | 0.4  | 0.4  | 0.4    | 0.4    |
| RICTOR     | 3.5   | 7.3  | 7.5  | 2.1    | 2.2    |
| RIF1       | 9.0   | 21.5 | 21.9 | 2.4    | 2.4    |
| RIIAD1     | 0.2   | 0.0  | 0.0  | #NAME? | #NAME? |
| RIN1       | 0.1   | 0.2  | 0.2  | 2.4    | 2.4    |
| RIPK3      | 0.3   | 1.6  | 2.0  | 5.5    | 6.9    |
| RLN3       | 0.4   | 11.5 | 11.0 | 27.5   | 26.3   |
| RLTPR      | 0.5   | 1.1  | 1.0  | 2.2    | 2.1    |
| RNASE2     | 7.6   | 43.4 | 39.6 | 5.7    | 5.2    |
| RNASE3     | 0.3   | 2.0  | 1.7  | 6.3    | 5.4    |
| RNASE6     | 0.5   | 1.6  | 2.0  | 3.2    | 4.2    |
| RNF151     | 0.0   | 0.0  | 0.1  | Inf    | Inf    |
| RNF217     | 1.4   | 3.8  | 4.0  | 2.7    | 2.8    |
| RNF5       | 0.4   | 0.0  | 0.0  | 0.0    | 0.0    |
| RNU11      | 0.0   | 13.0 | 22.2 | Inf    | Inf    |
| RNU6ATAC   | 80.3  | 0.0  | 0.0  | #NAME? | #NAME? |
| ROBO1      | 0.1   | 0.3  | 0.4  | 3.7    | 5.1    |
| ROBO3      | 0.2   | 0.7  | 0.7  | 4.1    | 4.2    |
| ROCK1      | 5.9   | 13.4 | 13.1 | 2.3    | 2.2    |
| ROR1       | 0.0   | 0.2  | 0.1  | 33.3   | 20.1   |
| ROR2       | 0.1   | 0.0  | 0.0  | #NAME? | #NAME? |
| RPS4Y2     | 0.2   | 0.1  | 0.0  | 0.3    | 0.3    |
| RPS6KA2    | 0.1   | 0.0  | 0.0  | 0.3    | 0.2    |
| RPS6KL1    | 9.9   | 3.4  | 3.5  | 0.3    | 0.3    |
| RRAGD      | 2.7   | 5.7  | 5.6  | 2.1    | 2.1    |
| RRM2       | 110.5 | 44.1 | 39.3 | 0.4    | 0.4    |
| RRN3P1     | 0.9   | 2.3  | 2.6  | 2.5    | 2.8    |
| RSPH1      | 0.1   | 0.4  | 0.4  | 3.4    | 3.5    |
| RTBDN      | 0.0   | 0.1  | 0.1  | 4.2    | 2.6    |
| RTKN2      | 0.1   | 0.4  | 0.3  | 5.3    | 3.8    |
| RTKN       | 0.1   | 0.2  | 0.4  | 2.4    | 4.0    |
| RTN1       | 0.8   | 5.7  | 4.8  | 7.2    | 6.0    |
| RTP4       | 0.0   | 0.6  | 1.2  | 16.1   | 33.8   |
| RUND3A     | 1.0   | 0.4  | 0.4  | 0.4    | 0.4    |
| RUNX3      | 1.5   | 3.7  | 3.4  | 2.5    | 2.3    |
| RXFP1      | 0.0   | 0.0  | 0.2  | Inf    | Inf    |
| RXFP4      | 0.2   | 0.1  | 0.1  | 0.3    | 0.4    |
| RYR2       | 0.0   | 0.1  | 0.1  | 11.4   | 5.5    |
| S100A7     | 0.2   | 0.0  | 0.0  | #NAME? | #NAME? |
| S100A8     | 0.1   | 0.6  | 0.2  | 6.9    | 2.9    |
| S100A9     | 0.0   | 0.8  | 0.1  | Inf    | Inf    |
| SACS       | 2.1   | 6.3  | 6.7  | 3.0    | 3.2    |
| SALL4      | 0.9   | 0.4  | 0.4  | 0.4    | 0.4    |
| SAMD12-AS1 | 0.1   | 0.2  | 0.3  | 3.3    | 6.0    |
| SAMD14     | 0.2   | 0.4  | 0.4  | 2.1    | 2.3    |
| SAMD15     | 0.1   | 0.2  | 0.4  | 2.6    | 5.0    |

|             |      |      |      |        |        |
|-------------|------|------|------|--------|--------|
| SAMD5       | 0.2  | 0.0  | 0.0  | 0.2    | 0.1    |
| SAMD9L      | 1.3  | 3.1  | 3.8  | 2.5    | 3.0    |
| SAMD9       | 2.3  | 6.8  | 6.7  | 3.0    | 2.9    |
| SARDH       | 0.0  | 0.2  | 0.3  | 22.3   | 33.6   |
| SARM1       | 0.2  | 0.5  | 0.4  | 2.1    | 2.1    |
| SASH3       | 0.3  | 2.2  | 1.6  | 8.2    | 5.9    |
| SBF2        | 0.4  | 0.1  | 0.2  | 0.4    | 0.5    |
| SCAF11      | 9.2  | 20.2 | 20.5 | 2.2    | 2.2    |
| SCAMP5      | 0.1  | 0.3  | 0.3  | 3.2    | 3.3    |
| SCARNA7     | 0.9  | 0.2  | 0.3  | 0.2    | 0.4    |
| SCARNA8     | 0.0  | 6.9  | 4.6  | Inf    | Inf    |
| SCARNA9L    | 0.2  | 0.6  | 0.6  | 3.4    | 3.6    |
| SCD5        | 0.2  | 0.7  | 0.5  | 3.5    | 2.3    |
| SCG2        | 0.2  | 0.6  | 0.5  | 3.2    | 3.0    |
| SCGB1B2P    | 0.0  | 0.1  | 0.1  | Inf    | Inf    |
| SCGB2B2     | 0.1  | 0.0  | 0.0  | #NAME? | #NAME? |
| SCHIP1      | 0.3  | 1.6  | 1.5  | 5.1    | 4.8    |
| SCIMP       | 0.0  | 0.1  | 0.1  | 2.1    | 3.5    |
| SCN1B       | 0.2  | 0.9  | 1.5  | 4.0    | 6.4    |
| SCN4A       | 0.2  | 0.6  | 0.8  | 3.1    | 4.1    |
| SCN9A       | 0.1  | 0.8  | 0.7  | 6.2    | 5.2    |
| SCRN1       | 3.2  | 8.2  | 9.3  | 2.6    | 2.9    |
| SCT         | 0.2  | 0.0  | 0.0  | #NAME? | #NAME? |
| SCUBE1      | 0.0  | 0.2  | 0.2  | 9.8    | 10.0   |
| SDR42E1     | 0.0  | 0.0  | 0.1  | 2.8    | 10.5   |
| SEC14L3     | 1.1  | 0.0  | 0.1  | 0.0    | 0.1    |
| SEC14L4     | 13.7 | 3.1  | 3.3  | 0.2    | 0.2    |
| SECTM1      | 0.1  | 0.7  | 0.9  | 6.1    | 8.1    |
| SELENBP1    | 62.8 | 6.8  | 10.0 | 0.1    | 0.2    |
| SELL        | 0.3  | 0.7  | 0.8  | 2.6    | 2.9    |
| SELM        | 0.6  | 1.6  | 1.3  | 2.8    | 2.3    |
| SEMA3B      | 0.0  | 0.1  | 0.1  | 8.3    | 10.5   |
| SEMA3C      | 0.1  | 0.6  | 0.4  | 7.4    | 5.2    |
| SEMA3F      | 0.0  | 0.1  | 0.1  | 4.2    | 7.4    |
| SEMA3G      | 0.1  | 0.3  | 0.3  | 2.1    | 2.2    |
| SEMA4A      | 0.2  | 3.6  | 3.7  | 16.9   | 17.3   |
| 10-Sep      | 1.0  | 3.6  | 3.6  | 3.5    | 3.5    |
| SEPT5-GP1BE | 3.1  | 9.4  | 8.2  | 3.0    | 2.6    |
| 5-Sep       | 3.6  | 11.7 | 14.6 | 3.3    | 4.1    |
| 6-Sep       | 4.4  | 16.0 | 15.1 | 3.7    | 3.5    |
| SERF2-C15OF | 0.2  | 0.0  | 0.0  | 0.0    | 0.0    |
| SERHL2      | 0.3  | 0.7  | 1.0  | 2.3    | 3.4    |
| SERPINB10   | 0.0  | 0.1  | 0.1  | Inf    | Inf    |
| SERPINB2    | 0.0  | 0.2  | 0.1  | Inf    | Inf    |
| SERPINB8    | 0.2  | 0.8  | 1.0  | 4.7    | 5.9    |
| SERPINE2    | 12.2 | 53.7 | 51.9 | 4.4    | 4.3    |
| SERPING1    | 1.8  | 9.0  | 9.0  | 5.0    | 5.0    |

|          |       |      |      |      |      |
|----------|-------|------|------|------|------|
| SERPIN1  | 2.0   | 9.1  | 8.9  | 4.5  | 4.4  |
| SERTAD3  | 9.4   | 4.2  | 4.3  | 0.5  | 0.5  |
| SESN2    | 10.2  | 4.0  | 3.4  | 0.4  | 0.3  |
| SETD7    | 0.6   | 2.1  | 1.9  | 3.7  | 3.4  |
| SFRP4    | 0.0   | 0.1  | 0.1  | 6.9  | 12.6 |
| SGIP1    | 0.0   | 0.1  | 0.1  | 4.2  | 4.0  |
| SGMS2    | 0.2   | 0.3  | 0.5  | 2.2  | 3.2  |
| SGTB     | 0.7   | 1.7  | 1.4  | 2.6  | 2.1  |
| SH2D1A   | 0.1   | 0.3  | 0.3  | 3.0  | 4.0  |
| SH2D2A   | 4.1   | 13.1 | 12.7 | 3.2  | 3.1  |
| SH3BP4   | 0.0   | 0.1  | 0.2  | 4.5  | 10.0 |
| SH3GL1P2 | 0.0   | 0.1  | 0.1  | 2.8  | 3.8  |
| SH3RF2   | 0.3   | 0.8  | 0.9  | 2.4  | 2.8  |
| SHANK1   | 0.9   | 2.1  | 2.8  | 2.3  | 3.0  |
| SHANK2   | 0.0   | 0.1  | 0.1  | 3.3  | 5.1  |
| SHANK3   | 0.0   | 0.6  | 0.5  | 13.7 | 12.8 |
| SHC4     | 0.5   | 1.0  | 1.0  | 2.1  | 2.1  |
| SHF      | 0.0   | 0.2  | 0.2  | 3.6  | 4.7  |
| SHISA4   | 1.4   | 2.8  | 3.4  | 2.0  | 2.4  |
| SHISA9   | 1.0   | 2.7  | 2.5  | 2.8  | 2.6  |
| SIAH3    | 0.0   | 0.1  | 0.2  | 4.5  | 11.6 |
| SIGLEC9  | 0.0   | 0.1  | 0.1  | Inf  | Inf  |
| SIPA1L2  | 0.1   | 0.1  | 0.0  | 0.5  | 0.3  |
| SIRPA    | 0.2   | 1.2  | 1.2  | 6.4  | 6.3  |
| SIRT4    | 1.0   | 0.5  | 0.2  | 0.5  | 0.2  |
| SKIL     | 0.8   | 1.7  | 1.8  | 2.1  | 2.2  |
| SKOR1    | 0.0   | 0.1  | 0.1  | 5.2  | 3.7  |
| SLAIN1   | 2.7   | 5.8  | 5.7  | 2.1  | 2.1  |
| SLAMF7   | 0.1   | 0.2  | 0.3  | 2.2  | 2.6  |
| SLA      | 1.0   | 7.3  | 8.1  | 7.0  | 7.8  |
| SLC12A2  | 0.7   | 2.2  | 1.6  | 3.1  | 2.2  |
| SLC12A8  | 0.1   | 0.1  | 0.1  | 2.7  | 2.5  |
| SLC16A14 | 0.0   | 0.2  | 0.1  | 11.9 | 4.2  |
| SLC16A3  | 5.7   | 12.8 | 14.5 | 2.2  | 2.5  |
| SLC16A5  | 0.6   | 1.7  | 1.7  | 2.8  | 2.7  |
| SLC17A7  | 0.0   | 0.1  | 0.2  | 6.6  | 8.9  |
| SLC18A2  | 4.2   | 11.2 | 9.7  | 2.7  | 2.3  |
| SLC1A5   | 113.8 | 54.6 | 53.0 | 0.5  | 0.5  |
| SLC22A15 | 0.2   | 0.9  | 0.7  | 4.8  | 3.9  |
| SLC22A16 | 8.1   | 4.0  | 3.5  | 0.5  | 0.4  |
| SLC22A17 | 0.9   | 6.7  | 8.5  | 7.7  | 9.9  |
| SLC24A3  | 2.5   | 5.3  | 5.1  | 2.1  | 2.0  |
| SLC24A5  | 0.0   | 0.2  | 0.3  | Inf  | Inf  |
| SLC25A24 | 0.3   | 1.3  | 1.0  | 3.9  | 3.0  |
| SLC25A27 | 0.2   | 1.3  | 1.1  | 6.4  | 5.2  |
| SLC25A29 | 3.6   | 8.3  | 9.8  | 2.3  | 2.8  |
| SLC25A37 | 272.5 | 69.8 | 81.4 | 0.3  | 0.3  |

|          |       |      |       |      |      |
|----------|-------|------|-------|------|------|
| SLC25A39 | 249.8 | 88.4 | 101.2 | 0.4  | 0.4  |
| SLC25A41 | 0.0   | 0.1  | 0.1   | Inf  | Inf  |
| SLC25A52 | 0.1   | 0.2  | 0.1   | 3.0  | 2.6  |
| SLC25A53 | 0.3   | 1.2  | 1.4   | 4.5  | 5.2  |
| SLC2A6   | 0.5   | 1.3  | 1.4   | 2.9  | 3.0  |
| SLC2A9   | 0.1   | 0.4  | 0.3   | 3.1  | 2.5  |
| SLC30A10 | 0.5   | 0.1  | 0.1   | 0.2  | 0.1  |
| SLC35F2  | 1.2   | 3.2  | 3.5   | 2.7  | 2.9  |
| SLC35G2  | 0.1   | 0.3  | 0.4   | 2.1  | 2.7  |
| SLC38A1  | 4.8   | 13.0 | 12.3  | 2.7  | 2.6  |
| SLC39A14 | 1.2   | 4.2  | 3.6   | 3.4  | 2.9  |
| SLC3A2   | 164.1 | 72.3 | 71.8  | 0.4  | 0.4  |
| SLC43A1  | 47.4  | 17.7 | 21.4  | 0.4  | 0.5  |
| SLC46A1  | 1.1   | 2.6  | 2.4   | 2.4  | 2.3  |
| SLC46A2  | 0.0   | 0.1  | 0.2   | Inf  | Inf  |
| SLC4A1   | 313.7 | 29.2 | 39.3  | 0.1  | 0.1  |
| SLC4A4   | 0.0   | 0.1  | 0.1   | 17.2 | 19.0 |
| SLC4A7   | 0.8   | 2.5  | 2.5   | 3.1  | 3.1  |
| SLC6A13  | 0.0   | 0.2  | 0.3   | Inf  | Inf  |
| SLC6A19  | 1.4   | 0.6  | 0.5   | 0.4  | 0.4  |
| SLC6A9   | 23.0  | 2.1  | 2.7   | 0.1  | 0.1  |
| SLC7A5   | 62.6  | 19.2 | 21.5  | 0.3  | 0.3  |
| SLC7A7   | 0.0   | 0.2  | 0.4   | 4.8  | 9.9  |
| SLC7A8   | 0.2   | 0.7  | 0.7   | 3.5  | 3.8  |
| SLC9A3R2 | 1.4   | 4.1  | 4.8   | 2.8  | 3.3  |
| SLC9A9   | 0.6   | 1.9  | 1.9   | 3.2  | 3.1  |
| SLCO2B1  | 7.1   | 14.9 | 16.0  | 2.1  | 2.3  |
| SLCO3A1  | 0.8   | 2.2  | 2.2   | 2.7  | 2.7  |
| SLCO4C1  | 0.6   | 1.9  | 1.5   | 3.2  | 2.5  |
| SLCO5A1  | 0.2   | 0.1  | 0.0   | 0.3  | 0.1  |
| SLFN12L  | 0.0   | 0.2  | 0.1   | 11.7 | 6.3  |
| SLFN12   | 1.0   | 2.3  | 2.1   | 2.2  | 2.0  |
| SLITRK6  | 0.0   | 0.2  | 0.1   | 4.3  | 2.7  |
| SMAD6    | 0.1   | 1.5  | 1.5   | 18.0 | 17.1 |
| SMAD9    | 0.6   | 0.2  | 0.3   | 0.3  | 0.5  |
| SMARCD3  | 0.2   | 1.2  | 0.8   | 5.5  | 3.7  |
| SMIM1    | 77.4  | 32.8 | 38.2  | 0.4  | 0.5  |
| SMIM3    | 2.4   | 5.9  | 6.8   | 2.4  | 2.8  |
| SMIM5    | 26.4  | 10.2 | 12.8  | 0.4  | 0.5  |
| SMIM6    | 0.3   | 1.1  | 1.7   | 4.3  | 6.4  |
| SMKR1    | 0.5   | 2.8  | 2.5   | 5.5  | 4.9  |
| SMO      | 0.0   | 0.2  | 0.1   | 5.9  | 2.7  |
| SMPDL3A  | 0.0   | 0.0  | 0.2   | 2.8  | 11.5 |
| SMTNL1   | 0.3   | 0.1  | 0.1   | 0.3  | 0.4  |
| SNCG     | 0.0   | 0.4  | 0.5   | 8.0  | 10.1 |
| SND1-IT1 | 0.0   | 0.0  | 0.1   | 2.8  | 8.4  |
| SNN      | 2.0   | 0.9  | 0.9   | 0.5  | 0.4  |

|            |        |        |        |        |        |
|------------|--------|--------|--------|--------|--------|
| SNORA10    | 37.4   | 10.3   | 12.4   | 0.3    | 0.3    |
| SNORA16A   | 8.8    | 0.0    | 3.9    | #NAME? | 0.4    |
| SNORA18    | 39.8   | 15.2   | 17.5   | 0.4    | 0.4    |
| SNORA19    | 14.9   | 0.0    | 0.0    | #NAME? | #NAME? |
| SNORA20    | 0.0    | 13.0   | 4.4    | Inf    | Inf    |
| SNORA24    | 10.6   | 0.0    | 4.6    | #NAME? | 0.4    |
| SNORA2A    | 0.0    | 18.6   | 3.7    | Inf    | Inf    |
| SNORA2B    | 7.3    | 0.0    | 0.0    | #NAME? | #NAME? |
| SNORA34    | 0.0    | 1.7    | 6.7    | Inf    | Inf    |
| SNORA3     | 11.3   | 0.0    | 4.9    | #NAME? | 0.4    |
| SNORA43    | 0.0    | 0.0    | 8.3    | Inf    | Inf    |
| SNORA45    | 10.6   | 2.3    | 0.0    | 0.2    | #NAME? |
| SNORA4     | 22.0   | 10.1   | 6.7    | 0.5    | 0.3    |
| SNORA51    | 10.0   | 4.3    | 4.4    | 0.4    | 0.4    |
| SNORA55    | 7.3    | 0.0    | 0.0    | #NAME? | #NAME? |
| SNORA58    | 0.4    | 0.2    | 0.0    | 0.5    | #NAME? |
| SNORA5C    | 29.3   | 5.1    | 3.3    | 0.2    | 0.1    |
| SNORA60    | 7.8    | 3.5    | 0.0    | 0.5    | #NAME? |
| SNORA62    | 6.3    | 0.9    | 0.0    | 0.1    | #NAME? |
| SNORA65    | 23.3   | 0.0    | 0.0    | #NAME? | #NAME? |
| SNORA66    | 9.3    | 0.0    | 0.0    | #NAME? | #NAME? |
| SNORA69    | 10.0   | 0.0    | 4.4    | #NAME? | 0.4    |
| SNORA74B   | 0.0    | 0.3    | 0.5    | Inf    | Inf    |
| SNORA75    | 14.7   | 0.0    | 3.3    | #NAME? | 0.2    |
| SNORA77    | 64.3   | 22.8   | 13.5   | 0.4    | 0.2    |
| SNORA79    | 6.2    | 0.0    | 0.0    | #NAME? | #NAME? |
| SNORD100   | 1838.4 | 441.2  | 0.0    | 0.2    | #NAME? |
| SNORD110   | 0.0    | 497.0  | 938.0  | Inf    | Inf    |
| SNORD116-4 | 320.8  | 68.0   | 156.4  | 0.2    | 0.5    |
| SNORD119   | 190.2  | 0.0    | 0.0    | #NAME? | #NAME? |
| SNORD12B   | 103.1  | 0.0    | 0.0    | #NAME? | #NAME? |
| SNORD16    | 134.9  | 0.0    | 0.0    | #NAME? | #NAME? |
| SNORD23    | 164.6  | 0.0    | 22.6   | #NAME? | 0.1    |
| SNORD26    | 998.4  | 497.0  | 0.0    | 0.5    | #NAME? |
| SNORD2     | 4706.3 | 0.0    | 0.0    | #NAME? | #NAME? |
| SNORD33    | 0.0    | 581.4  | 821.7  | Inf    | Inf    |
| SNORD36A   | 3894.7 | 1440.6 | 0.0    | 0.4    | #NAME? |
| SNORD46    | 160.4  | 0.0    | 0.0    | #NAME? | #NAME? |
| SNORD79    | 621.9  | 0.0    | 0.0    | #NAME? | #NAME? |
| SNORD80    | 5699.4 | 2453.0 | 1441.1 | 0.4    | 0.3    |
| SNORD83A   | 207.1  | 0.0    | 0.0    | #NAME? | #NAME? |
| SNORD83B   | 244.9  | 59.9   | 0.0    | 0.2    | #NAME? |
| SNORD88B   | 174.7  | 37.9   | 0.0    | 0.2    | #NAME? |
| SNPH       | 0.1    | 0.6    | 0.6    | 4.2    | 4.5    |
| SNX10      | 2.1    | 5.3    | 4.6    | 2.6    | 2.2    |
| SNX16      | 1.5    | 3.2    | 3.1    | 2.1    | 2.0    |
| SNX20      | 2.3    | 6.1    | 5.8    | 2.6    | 2.5    |

|             |       |       |       |           |          |
|-------------|-------|-------|-------|-----------|----------|
| SNX22       | 14.7  | 6.1   | 6.8   | 0.4       | 0.5      |
| SNX32       | 0.2   | 0.5   | 0.8   | 2.2       | 4.1      |
| SOHLH2      | 0.0   | 0.3   | 0.0   | 3572676.7 | 2.7      |
| SORBS3      | 0.1   | 0.2   | 0.2   | 3.4       | 3.9      |
| SORL1       | 0.1   | 0.4   | 0.4   | 5.3       | 5.3      |
| SOS1        | 6.7   | 19.1  | 18.2  | 2.8       | 2.7      |
| SOWAHC      | 0.6   | 3.8   | 3.9   | 6.2       | 6.3      |
| SOX6        | 2.4   | 0.4   | 0.6   | 0.2       | 0.3      |
| SPARC       | 1.6   | 6.4   | 6.2   | 4.0       | 3.9      |
| SPATA25     | 0.5   | 0.2   | 0.2   | 0.4       | 0.4      |
| SPATA6      | 0.0   | 0.1   | 0.1   | 4.7       | 2.4      |
| SPATA9      | 0.2   | 0.8   | 0.6   | 3.8       | 2.7      |
| SPDYC       | 0.1   | 0.7   | 0.9   | 5.8       | 7.1      |
| SPDYE1      | 0.2   | 0.4   | 0.5   | 2.4       | 3.1      |
| SPEG        | 0.0   | 0.1   | 0.1   | 19.9      | 37.8     |
| SPIN3       | 1.7   | 3.4   | 3.3   | 2.1       | 2.0      |
| SPINK1      | 0.0   | 0.5   | 0.2   | Inf       | Inf      |
| SPINK2      | 0.0   | 0.4   | 0.2   | Inf       | Inf      |
| SPINT1      | 0.4   | 1.7   | 2.2   | 4.5       | 5.7      |
| SPIRE1      | 0.3   | 1.3   | 1.2   | 4.7       | 4.3      |
| SPOCK1      | 0.2   | 0.7   | 0.7   | 3.5       | 3.5      |
| SPOCK3      | 0.1   | 0.0   | 0.0   | 0.1       | #NAME?   |
| SPP1        | 1.6   | 7.6   | 8.1   | 4.8       | 5.1      |
| SPRY4       | 0.4   | 0.9   | 1.2   | 2.3       | 2.8      |
| SPTBN1      | 0.3   | 1.2   | 1.1   | 3.9       | 3.6      |
| SPTB        | 136.2 | 45.9  | 53.9  | 0.3       | 0.4      |
| SPTLC3      | 0.1   | 0.5   | 0.5   | 6.0       | 5.8      |
| SPTY2D1-AS1 | 0.1   | 0.2   | 0.4   | 3.4       | 6.6      |
| SRC         | 1.8   | 3.9   | 3.8   | 2.2       | 2.1      |
| SREBF1      | 92.0  | 33.4  | 39.9  | 0.4       | 0.4      |
| SRGN        | 90.4  | 300.2 | 258.8 | 3.3       | 2.9      |
| SRMS        | 0.0   | 0.0   | 0.1   | Inf       | Inf      |
| SRPX2       | 0.1   | 0.4   | 0.3   | 3.7       | 3.1      |
| ST20-MTHFS  | 0.0   | 0.1   | 0.1   | 676732.3  | 640736.1 |
| ST3GAL4     | 1.7   | 5.6   | 7.0   | 3.4       | 4.2      |
| ST3GAL5     | 0.1   | 0.4   | 0.5   | 3.9       | 4.6      |
| ST3GAL6     | 0.2   | 0.9   | 0.6   | 4.5       | 3.0      |
| ST6GAL2     | 0.1   | 0.2   | 0.3   | 3.4       | 5.3      |
| ST6GALNAC4  | 40.7  | 16.0  | 19.3  | 0.4       | 0.5      |
| ST8SIA6     | 8.6   | 19.4  | 19.0  | 2.3       | 2.2      |
| STAB1       | 0.1   | 0.6   | 0.5   | 6.6       | 5.7      |
| STAC3       | 1.5   | 4.6   | 4.3   | 3.0       | 2.8      |
| STAC        | 1.5   | 3.6   | 4.0   | 2.4       | 2.6      |
| STAMBPL1    | 0.5   | 1.7   | 1.6   | 3.2       | 3.0      |
| STAP1       | 2.8   | 9.1   | 9.7   | 3.3       | 3.5      |
| STARD9      | 0.1   | 0.3   | 0.3   | 2.5       | 2.4      |
| STAR        | 0.8   | 2.2   | 1.7   | 2.7       | 2.1      |



|             |       |      |      |        |        |
|-------------|-------|------|------|--------|--------|
| STAT4       | 0.1   | 0.4  | 0.5  | 4.3    | 5.4    |
| STAU2-AS1   | 0.1   | 0.2  | 0.2  | 2.1    | 2.1    |
| STEAP4      | 0.0   | 0.0  | 0.1  | Inf    | Inf    |
| STK33       | 0.2   | 0.6  | 0.6  | 2.9    | 3.0    |
| STK39       | 3.2   | 8.7  | 8.5  | 2.8    | 2.7    |
| STL         | 0.1   | 0.1  | 0.1  | 2.2    | 2.3    |
| STON1       | 0.3   | 0.8  | 1.0  | 2.5    | 3.3    |
| STRADB      | 36.6  | 17.3 | 15.5 | 0.5    | 0.4    |
| STX16-NPEPL | 0.3   | 1.3  | 1.1  | 4.3    | 3.9    |
| STX1B       | 0.5   | 1.1  | 1.1  | 2.1    | 2.2    |
| STXBP1      | 2.8   | 5.8  | 7.0  | 2.1    | 2.5    |
| STXBP5      | 4.3   | 11.0 | 11.0 | 2.6    | 2.6    |
| STYK1       | 0.1   | 0.4  | 0.4  | 2.5    | 2.6    |
| SUCNR1      | 0.1   | 0.9  | 0.7  | 6.4    | 5.4    |
| SULF2       | 0.1   | 0.3  | 0.4  | 2.8    | 4.2    |
| SULT1A1     | 3.9   | 9.0  | 8.6  | 2.3    | 2.2    |
| SULT1A2     | 0.3   | 1.0  | 0.8  | 3.0    | 2.4    |
| SUMO2       | 229.6 | 87.8 | 78.7 | 0.4    | 0.3    |
| SUSD3       | 2.4   | 9.8  | 9.8  | 4.0    | 4.1    |
| SUSD4       | 0.4   | 0.1  | 0.1  | 0.4    | 0.3    |
| SV2A        | 0.6   | 3.8  | 4.6  | 6.6    | 8.0    |
| SVIL        | 0.1   | 0.4  | 0.4  | 2.9    | 2.7    |
| SYBU        | 0.1   | 0.3  | 0.3  | 2.5    | 2.5    |
| SYCP1       | 0.1   | 0.0  | 0.0  | #NAME? | #NAME? |
| SYCP2       | 0.0   | 0.3  | 0.1  | 6.9    | 3.5    |
| SYNE4       | 0.2   | 0.1  | 0.1  | 0.4    | 0.4    |
| SYNGR3      | 0.2   | 0.3  | 0.6  | 2.1    | 4.0    |
| SYNGR4      | 0.0   | 0.2  | 0.1  | 4.7    | 2.0    |
| SYT11       | 0.6   | 2.7  | 2.5  | 5.0    | 4.5    |
| SYT5        | 0.0   | 0.1  | 0.1  | 8.3    | 5.2    |
| TAC3        | 1.2   | 2.9  | 2.7  | 2.4    | 2.2    |
| TACC2       | 1.9   | 4.4  | 3.9  | 2.3    | 2.0    |
| TACR2       | 0.0   | 0.1  | 0.2  | 3.5    | 4.2    |
| TAGAP       | 0.5   | 1.1  | 1.3  | 2.3    | 3.0    |
| TANGO2      | 64.0  | 29.8 | 31.8 | 0.5    | 0.5    |
| TAS2R19     | 0.0   | 0.4  | 0.4  | 9.3    | 9.2    |
| TAS2R30     | 0.0   | 0.2  | 0.2  | 6.0    | 4.1    |
| TAS2R42     | 0.0   | 0.1  | 0.0  | Inf    | Inf    |
| TBC1D19     | 0.6   | 1.7  | 1.2  | 2.9    | 2.1    |
| TBC1D8B     | 0.3   | 0.6  | 0.9  | 2.0    | 3.0    |
| TBKBP1      | 0.2   | 0.8  | 0.7  | 3.8    | 3.4    |
| TBXA2R      | 0.4   | 0.9  | 0.8  | 2.7    | 2.2    |
| TBXAS1      | 3.9   | 11.9 | 13.3 | 3.0    | 3.4    |
| TC2N        | 0.3   | 0.6  | 0.7  | 2.1    | 2.5    |
| TCEA2       | 0.5   | 1.6  | 1.1  | 3.4    | 2.2    |
| TCEAL3      | 5.4   | 11.6 | 11.1 | 2.1    | 2.0    |
| TCF15       | 0.1   | 0.9  | 0.7  | 6.9    | 5.4    |

|            |       |      |      |         |         |
|------------|-------|------|------|---------|---------|
| TCF7       | 0.1   | 0.2  | 0.2  | 2.1     | 2.4     |
| TCTE3      | 0.3   | 0.1  | 0.1  | 0.4     | 0.3     |
| TCTEX1D1   | 0.3   | 1.1  | 0.7  | 3.8     | 2.7     |
| TDRD10     | 0.2   | 0.0  | 0.0  | 0.0     | #NAME?  |
| TDRD9      | 0.1   | 0.7  | 0.5  | 5.4     | 3.9     |
| TEAD1      | 1.1   | 0.2  | 0.1  | 0.2     | 0.1     |
| TEAD4      | 0.3   | 1.8  | 2.1  | 5.2     | 6.3     |
| TEK        | 0.0   | 0.3  | 0.3  | 7.9     | 8.3     |
| TERC       | 1.2   | 0.2  | 0.4  | 0.2     | 0.3     |
| TERT       | 0.0   | 0.1  | 0.1  | 2.9     | 4.3     |
| TET1       | 0.3   | 0.8  | 0.7  | 2.5     | 2.1     |
| TET3       | 17.7  | 6.4  | 6.7  | 0.4     | 0.4     |
| TEX15      | 0.0   | 0.4  | 0.4  | 9.1     | 8.2     |
| TFEC       | 0.0   | 0.2  | 0.1  | 5.7     | 3.5     |
| TGFA       | 0.0   | 0.1  | 0.1  | 3.5     | 2.1     |
| TGFBI      | 0.0   | 0.2  | 0.1  | Inf     | Inf     |
| TGM2       | 27.1  | 10.0 | 10.1 | 0.4     | 0.4     |
| THBS1      | 22.1  | 69.7 | 72.6 | 3.2     | 3.3     |
| THRB-AS1   | 0.2   | 0.4  | 0.5  | 2.2     | 3.1     |
| THSD7A     | 0.0   | 0.1  | 0.1  | 30.2    | 38.1    |
| TIAM2      | 0.0   | 0.1  | 0.1  | 6.8     | 3.4     |
| TIE1       | 0.1   | 0.5  | 0.4  | 6.6     | 6.4     |
| TIMP2      | 0.0   | 0.3  | 0.3  | 7.0     | 5.3     |
| TINAGL1    | 0.2   | 0.0  | 0.1  | #NAME?  | 0.4     |
| TINCR      | 1.2   | 0.5  | 0.5  | 0.4     | 0.4     |
| TJP1       | 0.1   | 0.3  | 0.1  | 5.5     | 2.6     |
| TK1        | 111.4 | 46.3 | 50.6 | 0.4     | 0.5     |
| TKTL1      | 0.1   | 0.5  | 0.3  | 7.6     | 4.7     |
| TLE2       | 0.2   | 0.1  | 0.1  | 0.3     | 0.5     |
| TLR2       | 0.0   | 0.2  | 0.1  | 7.7     | 4.6     |
| TLR4       | 0.1   | 1.0  | 0.6  | 8.0     | 5.0     |
| TLX3       | 0.2   | 0.0  | 0.1  | 0.1     | 0.4     |
| TM4SF19-TC | 0.0   | 0.2  | 0.3  | #####   | #####   |
| TM6SF1     | 2.9   | 7.6  | 6.5  | 2.6     | 2.2     |
| TMC5       | 1.0   | 0.4  | 0.3  | 0.4     | 0.3     |
| TMC7       | 0.1   | 0.1  | 0.0  | 0.5     | 0.4     |
| TMCC2      | 7.1   | 1.9  | 2.3  | 0.3     | 0.3     |
| TMEM110-M  | 0.0   | 0.3  | 0.9  | 21420.2 | 64835.8 |
| TMEM136    | 0.0   | 0.3  | 0.3  | 6.7     | 7.4     |
| TMEM14E    | 0.1   | 0.2  | 0.2  | 4.8     | 4.7     |
| TMEM150B   | 0.0   | 0.4  | 0.1  | 10.0    | 2.0     |
| TMEM154    | 0.5   | 1.6  | 1.3  | 3.2     | 2.7     |
| TMEM156    | 0.1   | 0.3  | 0.5  | 3.9     | 6.3     |
| TMEM158    | 0.2   | 1.2  | 0.8  | 5.9     | 4.1     |
| TMEM163    | 0.1   | 0.9  | 1.0  | 8.7     | 10.4    |
| TMEM169    | 0.0   | 0.1  | 0.2  | 2.1     | 5.0     |
| TMEM170B   | 0.6   | 1.3  | 1.3  | 2.2     | 2.2     |

|             |      |      |      |          |        |
|-------------|------|------|------|----------|--------|
| TMEM176B    | 0.0  | 0.1  | 0.1  | Inf      | Inf    |
| TMEM189-U   | 0.0  | 0.0  | 0.5  | 485619.6 | #####  |
| TMEM191C    | 0.0  | 0.1  | 0.2  | Inf      | Inf    |
| TMEM198     | 0.1  | 0.4  | 0.6  | 2.7      | 4.1    |
| TMEM204     | 1.4  | 4.4  | 4.4  | 3.3      | 3.2    |
| TMEM220     | 1.2  | 2.6  | 2.7  | 2.2      | 2.3    |
| TMEM229B    | 0.8  | 2.2  | 2.8  | 2.9      | 3.6    |
| TMEM232     | 0.0  | 0.1  | 0.2  | 4.5      | 9.5    |
| TMEM233     | 0.7  | 0.0  | 0.0  | #NAME?   | 0.1    |
| TMEM238     | 0.7  | 2.4  | 1.9  | 3.3      | 2.7    |
| TMEM249     | 0.2  | 0.5  | 0.6  | 2.2      | 2.3    |
| TMEM253     | 0.3  | 0.7  | 0.8  | 2.3      | 2.6    |
| TMEM255B    | 0.0  | 0.2  | 0.3  | 4.7      | 8.2    |
| TMEM25      | 0.1  | 0.6  | 0.6  | 5.9      | 5.9    |
| TMEM45A     | 0.4  | 1.1  | 0.8  | 2.5      | 2.0    |
| TMEM51      | 0.3  | 0.7  | 0.7  | 2.5      | 2.8    |
| TMEM63C     | 0.8  | 1.7  | 1.7  | 2.1      | 2.1    |
| TMEM71      | 0.1  | 0.2  | 0.2  | 2.4      | 3.2    |
| TMEM74B     | 0.1  | 0.5  | 0.3  | 5.2      | 3.5    |
| TMEM98      | 13.8 | 5.8  | 6.7  | 0.4      | 0.5    |
| TMOD2       | 0.4  | 0.1  | 0.1  | 0.4      | 0.2    |
| TMX2        | 59.9 | 28.0 | 27.9 | 0.5      | 0.5    |
| TNFAIP2     | 0.2  | 0.9  | 0.9  | 3.9      | 4.2    |
| TNFAIP6     | 0.2  | 0.4  | 0.5  | 2.3      | 3.0    |
| TNFAIP8L2-S | 0.6  | 1.2  | 1.6  | 2.1      | 2.8    |
| TNFAIP8L2   | 2.3  | 6.6  | 6.5  | 2.8      | 2.8    |
| TNFRSF11A   | 0.2  | 0.7  | 0.6  | 4.1      | 3.6    |
| TNFRSF19    | 10.6 | 4.6  | 3.6  | 0.4      | 0.3    |
| TNFRSF21    | 1.4  | 4.4  | 5.2  | 3.2      | 3.8    |
| TNFRSF25    | 0.4  | 2.3  | 2.3  | 5.2      | 5.1    |
| TNFRSF8     | 0.1  | 1.1  | 1.2  | 14.3     | 15.5   |
| TNFSF13B    | 0.9  | 4.6  | 4.0  | 5.1      | 4.4    |
| TNNI3       | 1.8  | 5.4  | 5.1  | 3.0      | 2.8    |
| TNNT1       | 0.3  | 1.1  | 1.9  | 3.9      | 6.5    |
| TOP1P1      | 0.1  | 0.2  | 0.3  | 2.5      | 4.2    |
| TP53AIP1    | 0.0  | 0.2  | 0.1  | Inf      | Inf    |
| TP53I11     | 0.4  | 5.8  | 6.5  | 14.1     | 15.7   |
| TP53TG5     | 0.3  | 0.1  | 0.0  | 0.4      | #NAME? |
| TP73        | 0.3  | 0.1  | 0.0  | 0.4      | 0.1    |
| TPD52       | 1.9  | 6.7  | 5.8  | 3.6      | 3.1    |
| TPH1        | 0.1  | 0.4  | 0.2  | 4.1      | 2.1    |
| TPM2        | 0.6  | 1.5  | 2.0  | 2.4      | 3.3    |
| TPM4        | 29.2 | 78.8 | 68.1 | 2.7      | 2.3    |
| TPR         | 9.8  | 28.3 | 27.8 | 2.9      | 2.8    |
| TPST1       | 0.2  | 0.5  | 0.4  | 3.2      | 2.3    |
| TPTE2P6     | 0.1  | 0.4  | 0.4  | 3.5      | 3.3    |
| TPTE2       | 0.0  | 0.1  | 0.2  | 3.6      | 8.8    |

|             |      |      |      |      |      |
|-------------|------|------|------|------|------|
| TRABD2A     | 0.1  | 0.0  | 0.0  | 0.2  | 0.1  |
| TRAF3IP3    | 1.2  | 3.0  | 2.8  | 2.5  | 2.4  |
| TRAK2       | 32.5 | 12.0 | 11.3 | 0.4  | 0.3  |
| TREML2      | 1.5  | 4.4  | 4.3  | 2.9  | 2.9  |
| TREML3P     | 0.1  | 0.6  | 0.4  | 9.8  | 7.2  |
| TRERF1      | 0.3  | 1.7  | 1.7  | 5.1  | 5.1  |
| TRHR        | 0.0  | 0.2  | 0.1  | Inf  | Inf  |
| TRIB3       | 21.6 | 3.2  | 2.8  | 0.1  | 0.1  |
| TRIM10      | 14.7 | 3.2  | 3.7  | 0.2  | 0.2  |
| TRIM16L     | 1.1  | 3.4  | 3.0  | 3.0  | 2.6  |
| TRIM16      | 1.1  | 3.1  | 3.1  | 3.0  | 3.0  |
| TRIM17      | 1.5  | 3.2  | 3.2  | 2.1  | 2.1  |
| TRIM2       | 0.0  | 0.1  | 0.2  | 8.1  | 12.7 |
| TRIM46      | 0.2  | 1.8  | 1.6  | 9.0  | 7.9  |
| TRIM63      | 0.1  | 0.4  | 0.3  | 3.0  | 2.2  |
| TRIM9       | 0.0  | 0.1  | 0.1  | 2.6  | 3.7  |
| TRIO        | 0.9  | 2.1  | 2.1  | 2.3  | 2.3  |
| TRIP11      | 2.0  | 5.3  | 5.2  | 2.6  | 2.6  |
| TRO         | 0.1  | 0.6  | 0.4  | 10.0 | 6.9  |
| TRPC1       | 0.1  | 0.9  | 0.6  | 6.5  | 4.3  |
| TRPC2       | 0.2  | 0.6  | 0.7  | 3.5  | 4.0  |
| TRPV3       | 0.0  | 0.2  | 0.1  | 4.9  | 2.4  |
| TRPV5       | 0.2  | 0.0  | 0.1  | 0.2  | 0.3  |
| TSC22D1-AS1 | 0.2  | 0.7  | 0.7  | 3.6  | 3.6  |
| TSGA10      | 0.6  | 1.3  | 1.2  | 2.2  | 2.0  |
| TSPAN10     | 0.5  | 0.1  | 0.2  | 0.2  | 0.4  |
| TSPAN12     | 0.0  | 0.2  | 0.3  | 13.9 | 21.0 |
| TSPAN2      | 0.1  | 0.3  | 0.3  | 5.8  | 4.9  |
| TSPAN33     | 1.7  | 3.7  | 4.5  | 2.2  | 2.7  |
| TSPAN9      | 0.7  | 1.5  | 2.0  | 2.2  | 2.8  |
| TSPO2       | 16.1 | 2.8  | 1.8  | 0.2  | 0.1  |
| TSPYL5      | 0.1  | 0.7  | 0.7  | 4.9  | 4.9  |
| TSSK2       | 0.3  | 0.6  | 0.8  | 2.2  | 2.9  |
| TTC29       | 1.1  | 0.4  | 0.4  | 0.4  | 0.4  |
| TTC39A      | 0.3  | 0.1  | 0.1  | 0.4  | 0.2  |
| TTC39C      | 0.9  | 3.7  | 3.7  | 4.3  | 4.2  |
| TTC3P1      | 0.0  | 0.1  | 0.1  | 4.2  | 9.4  |
| TTLL7       | 0.3  | 1.3  | 0.7  | 3.6  | 2.0  |
| TTY10       | 0.0  | 0.1  | 0.2  | 3.1  | 5.7  |
| TTYH3       | 2.7  | 7.0  | 7.9  | 2.6  | 3.0  |
| TUBA1A      | 14.1 | 67.7 | 60.6 | 4.8  | 4.3  |
| TUBB2B      | 1.5  | 5.4  | 5.8  | 3.5  | 3.8  |
| TUBB4A      | 0.2  | 0.9  | 1.1  | 5.2  | 6.3  |
| TUBG1       | 68.6 | 31.0 | 30.6 | 0.5  | 0.4  |
| TUBG2       | 14.7 | 5.7  | 5.4  | 0.4  | 0.4  |
| TVP23B      | 4.1  | 9.4  | 8.5  | 2.3  | 2.1  |
| TXK         | 0.4  | 1.1  | 1.1  | 2.7  | 2.8  |

|            |       |      |      |      |      |
|------------|-------|------|------|------|------|
| TXLNB      | 0.0   | 0.2  | 0.1  | 27.2 | 20.0 |
| TXNDC2     | 0.0   | 0.3  | 0.2  | 9.0  | 5.2  |
| TYROBP     | 1.9   | 6.6  | 6.5  | 3.5  | 3.5  |
| UACA       | 0.1   | 0.5  | 0.5  | 4.6  | 4.0  |
| UBAC1      | 204.7 | 85.6 | 89.7 | 0.4  | 0.4  |
| UBASH3B    | 2.8   | 7.3  | 6.4  | 2.6  | 2.3  |
| UBE2F-SCLY | 1.1   | 0.2  | 0.4  | 0.2  | 0.3  |
| UBE2MP1    | 0.4   | 1.3  | 1.2  | 3.0  | 2.8  |
| UCHL1      | 0.1   | 0.8  | 0.5  | 12.5 | 8.7  |
| UCN2       | 0.0   | 0.3  | 0.2  | 14.3 | 9.3  |
| UGDH-AS1   | 9.2   | 24.0 | 21.7 | 2.6  | 2.4  |
| UGT2B28    | 0.0   | 0.2  | 0.1  | 10.2 | 3.1  |
| ULK4P3     | 0.0   | 0.2  | 0.3  | 6.8  | 10.3 |
| UMODL1     | 0.0   | 0.7  | 0.5  | 23.8 | 15.0 |
| UNC119     | 2.0   | 4.6  | 5.3  | 2.3  | 2.6  |
| UPK1A-AS1  | 1.0   | 2.3  | 2.6  | 2.3  | 2.5  |
| UPK1A      | 0.1   | 0.1  | 0.5  | 2.0  | 9.3  |
| UPP1       | 0.1   | 0.1  | 0.1  | 2.1  | 2.1  |
| USP27X     | 0.6   | 1.6  | 1.2  | 2.6  | 2.0  |
| USP2       | 0.0   | 0.1  | 0.1  | 2.4  | 5.9  |
| USP51      | 0.4   | 1.0  | 0.9  | 2.3  | 2.1  |
| USP53      | 0.7   | 1.4  | 1.4  | 2.0  | 2.1  |
| USP9Y      | 0.2   | 0.6  | 0.5  | 2.7  | 2.4  |
| UTRN       | 0.5   | 2.3  | 2.2  | 4.8  | 4.5  |
| UTS2       | 0.2   | 1.3  | 1.3  | 5.7  | 5.9  |
| VANGL2     | 0.3   | 0.7  | 0.8  | 2.3  | 2.4  |
| VASN       | 0.2   | 0.6  | 0.5  | 2.9  | 2.2  |
| VAV2       | 1.4   | 4.2  | 4.9  | 2.9  | 3.4  |
| VAV3       | 2.5   | 6.8  | 5.5  | 2.7  | 2.2  |
| VEGFC      | 0.1   | 0.6  | 0.3  | 4.7  | 2.6  |
| VEPH1      | 0.0   | 0.2  | 0.1  | 15.7 | 5.3  |
| VIP        | 0.0   | 0.1  | 0.0  | Inf  | Inf  |
| VNN1       | 0.0   | 0.2  | 0.1  | 11.1 | 5.3  |
| VNN2       | 0.4   | 1.0  | 0.8  | 2.5  | 2.0  |
| VPS13A     | 5.3   | 14.7 | 15.4 | 2.8  | 2.9  |
| VPS13C     | 2.8   | 7.3  | 7.2  | 2.6  | 2.6  |
| VSIG10L    | 0.5   | 1.0  | 1.2  | 2.2  | 2.6  |
| VSIG10     | 0.1   | 0.4  | 0.4  | 2.9  | 3.1  |
| VSIG2      | 0.1   | 0.2  | 0.5  | 2.3  | 5.5  |
| VSIG4      | 0.0   | 0.1  | 0.0  | Inf  | Inf  |
| VTN        | 0.1   | 0.1  | 0.1  | 2.1  | 2.4  |
| VWA2       | 0.1   | 0.2  | 0.2  | 4.1  | 3.9  |
| VWA7       | 0.3   | 0.9  | 1.2  | 3.5  | 4.2  |
| VWDE       | 0.6   | 1.5  | 1.4  | 2.3  | 2.1  |
| VWF        | 0.8   | 2.5  | 2.8  | 3.2  | 3.6  |
| WASF3      | 0.2   | 0.6  | 0.4  | 3.8  | 2.7  |
| WAS        | 4.1   | 10.5 | 12.7 | 2.5  | 3.1  |

|         |      |      |      |        |        |
|---------|------|------|------|--------|--------|
| WBP5    | 11.6 | 36.6 | 28.0 | 3.2    | 2.4    |
| WDFY4   | 0.0  | 0.1  | 0.1  | 6.9    | 5.3    |
| WDR54   | 1.2  | 8.3  | 6.3  | 7.0    | 5.3    |
| WFDC1   | 0.4  | 1.3  | 1.2  | 3.5    | 3.2    |
| WIPF1   | 4.1  | 13.3 | 13.0 | 3.2    | 3.2    |
| WNK2    | 0.0  | 0.1  | 0.1  | 5.5    | 6.8    |
| WNK3    | 0.1  | 0.0  | 0.0  | 0.3    | 0.2    |
| WWTR1   | 0.1  | 0.2  | 0.2  | 2.4    | 2.9    |
| XIRP1   | 0.3  | 2.2  | 3.1  | 8.7    | 12.2   |
| XIRP2   | 0.0  | 0.2  | 0.2  | 6.0    | 4.9    |
| XKR9    | 0.2  | 0.7  | 0.6  | 3.3    | 2.6    |
| XYLT1   | 0.1  | 0.7  | 0.6  | 8.0    | 7.4    |
| ZBTB41  | 0.4  | 1.6  | 1.3  | 4.3    | 3.6    |
| ZBTB46  | 0.2  | 0.6  | 0.5  | 2.6    | 2.0    |
| ZBTB47  | 0.0  | 0.2  | 0.2  | 12.1   | 14.8   |
| ZC3H12C | 0.2  | 1.3  | 0.9  | 5.4    | 3.5    |
| ZDHHC15 | 0.0  | 0.4  | 0.7  | 7.2    | 13.4   |
| ZDHHC19 | 0.1  | 0.2  | 0.2  | 2.0    | 3.1    |
| ZDHHC21 | 1.4  | 3.6  | 3.3  | 2.5    | 2.3    |
| ZDHHC23 | 0.5  | 2.1  | 2.1  | 4.1    | 4.3    |
| ZFC3H1  | 5.8  | 11.9 | 12.5 | 2.0    | 2.1    |
| ZFHX2   | 0.0  | 0.1  | 0.1  | 2.9    | 5.6    |
| ZFP28   | 0.2  | 0.5  | 0.7  | 2.6    | 4.0    |
| ZFP36   | 40.9 | 14.7 | 15.6 | 0.4    | 0.4    |
| ZFPM2   | 0.0  | 0.2  | 0.3  | 6.0    | 8.9    |
| ZFX-AS1 | 0.1  | 0.0  | 0.0  | #NAME? | #NAME? |
| ZG16B   | 0.2  | 0.7  | 0.5  | 3.1    | 2.2    |
| ZMAT1   | 0.3  | 2.0  | 1.4  | 7.8    | 5.5    |
| ZNF100  | 1.8  | 4.2  | 4.4  | 2.3    | 2.4    |
| ZNF107  | 1.5  | 3.8  | 3.9  | 2.6    | 2.6    |
| ZNF117  | 0.7  | 4.2  | 3.4  | 5.9    | 4.8    |
| ZNF135  | 0.0  | 0.2  | 0.2  | 8.1    | 8.3    |
| ZNF177  | 0.1  | 0.6  | 0.7  | 5.2    | 6.1    |
| ZNF214  | 0.1  | 0.2  | 0.2  | 2.7    | 2.2    |
| ZNF260  | 2.0  | 4.4  | 4.2  | 2.2    | 2.1    |
| ZNF286A | 0.5  | 1.1  | 1.4  | 2.3    | 2.7    |
| ZNF287  | 0.1  | 0.4  | 0.5  | 2.6    | 3.4    |
| ZNF28   | 1.5  | 3.3  | 3.1  | 2.1    | 2.1    |
| ZNF292  | 2.1  | 6.1  | 6.0  | 2.8    | 2.8    |
| ZNF32   | 1.5  | 4.9  | 3.5  | 3.2    | 2.3    |
| ZNF334  | 0.2  | 0.7  | 0.7  | 3.3    | 3.3    |
| ZNF33A  | 3.6  | 9.3  | 8.8  | 2.6    | 2.5    |
| ZNF33B  | 2.5  | 5.8  | 5.7  | 2.3    | 2.2    |
| ZNF354C | 0.2  | 0.5  | 0.5  | 3.1    | 3.1    |
| ZNF37A  | 2.5  | 5.3  | 5.0  | 2.1    | 2.0    |
| ZNF385A | 2.6  | 7.3  | 8.7  | 2.8    | 3.3    |
| ZNF439  | 1.1  | 2.7  | 2.7  | 2.5    | 2.5    |

|             |     |     |     |      |      |
|-------------|-----|-----|-----|------|------|
| ZNF43       | 0.7 | 1.8 | 1.9 | 2.7  | 2.9  |
| ZNF462      | 0.0 | 0.5 | 0.7 | 13.7 | 17.4 |
| ZNF467      | 0.1 | 0.2 | 0.2 | 2.5  | 3.1  |
| ZNF469      | 0.0 | 0.1 | 0.1 | 6.9  | 6.8  |
| ZNF470      | 0.2 | 0.8 | 0.7 | 3.5  | 3.2  |
| ZNF471      | 0.3 | 0.7 | 0.8 | 2.6  | 2.9  |
| ZNF480      | 2.5 | 6.4 | 6.9 | 2.5  | 2.8  |
| ZNF485      | 0.4 | 0.8 | 0.8 | 2.0  | 2.1  |
| ZNF518A     | 2.3 | 5.5 | 4.8 | 2.4  | 2.1  |
| ZNF528      | 1.2 | 2.4 | 2.4 | 2.1  | 2.0  |
| ZNF546      | 0.4 | 0.9 | 0.9 | 2.1  | 2.3  |
| ZNF596      | 0.4 | 1.0 | 1.0 | 2.3  | 2.5  |
| ZNF606      | 0.7 | 1.4 | 1.6 | 2.1  | 2.3  |
| ZNF625-ZNF2 | 0.2 | 0.3 | 0.4 | 2.0  | 2.6  |
| ZNF658      | 0.1 | 0.2 | 0.2 | 2.2  | 3.0  |
| ZNF667      | 0.5 | 1.5 | 1.5 | 3.3  | 3.2  |
| ZNF677      | 0.3 | 0.6 | 0.7 | 2.1  | 2.3  |
| ZNF678      | 0.9 | 2.2 | 2.1 | 2.3  | 2.3  |
| ZNF681      | 0.1 | 0.5 | 0.3 | 4.5  | 2.5  |
| ZNF682      | 0.0 | 0.3 | 0.2 | 7.8  | 4.5  |
| ZNF711      | 2.3 | 8.3 | 7.2 | 3.6  | 3.1  |
| ZNF721      | 2.4 | 6.2 | 5.3 | 2.6  | 2.2  |
| ZNF804A     | 0.2 | 2.2 | 1.5 | 13.9 | 9.7  |
| ZNF804B     | 0.0 | 0.0 | 0.1 | 6.3  | 17.9 |
| ZNF876P     | 0.1 | 0.5 | 0.5 | 3.7  | 3.6  |
| ZNF880      | 1.4 | 3.7 | 3.8 | 2.6  | 2.7  |
| ZNF91       | 0.5 | 1.6 | 1.7 | 3.2  | 3.5  |
| ZNRF2P2     | 0.1 | 0.0 | 0.0 | 0.3  | 0.3  |
| ZRANB2-AS1  | 0.5 | 1.2 | 1.3 | 2.6  | 2.9  |
